# Supplementary material for: Comparison of seven popular structured dietary programmes and risk of mortality and major cardiovascular events in patients at increased cardiovascular risk: systematic review and network meta-analysis
Source: PubMed Central journal article supplement — BMJ. 2023 Mar 29;380:e072003. doi: 10.1136/bmj-2022-072003 (PMC10053756; doi:10.1136/bmj-2022-072003), 2023-03-29
Supplement: karg072003.ww.pdf [file karg072003.ww.pdf]

## Supplementary Appendix 1

Karam G. *et al.*, Comparison of seven popular structured dietary programmes and the risk of mortality and major cardiovascular events in patients at increased cardiovascular risk: A systematic review and network meta-analysis. *BMJ* 2023

Text S1. Further description of GRADE approach.

Text S2. Original search strategy (November 23, 2016).

Text S3. Search update (April 18, 2020).

Text S4. Search update (September 4, 2021).

Table S1. Characteristics of included studies.

Table S2. Excluded articles with reasons for exclusion.

Table S3. Network meta-analysis results comparing the effects of named dietary programmes for all-cause mortality at 12 ( $\pm$ 3) months of follow-up (N = 13 RCTs) including odds ratios (OR) and 95% CIs.

Table S4. Network meta-analysis results comparing the effects of named dietary programmes for all-cause mortality at 12 ( $\pm$ 3) months of follow-up (N = 12 RCTs) including odds ratios (OR) and 95% CIs. Sensitivity analysis excluding Singh 2017.

Table S5. Network meta-analysis results comparing the effects of named dietary programmes for all-cause mortality at last follow-up (N = 37 RCTs) including odds ratios (OR) and 95% CIs.

Table S6. Network meta-analysis results comparing the effects of named dietary programmes for all-cause mortality at last follow-up (N = 35 RCTs) including odds ratios (OR) and 95% CIs. Sensitivity analysis excluding Singh 2002 & 2017.

Table S7. Network meta-analysis results comparing the effects of named dietary programmes for all-cause mortality at last follow-up including odds ratios (OR) and 95% CIs. Sensitivity analysis excluding trials with smoking or drug therapy interventions.

Table S8. Network meta-analysis results comparing the effects of named dietary programmes for cardiovascular mortality (N = 32 RCTs) including odds ratios (OR) and 95% CIs.

Table S9. Network meta-analysis results comparing the effects of named dietary programmes for cardiovascular mortality (N = 30 RCTs) including odds ratios (OR) and 95% CIs. Sensitivity analysis excluding Singh 2002 and 2017.

Table S10. Network meta-analysis results comparing the effects of named dietary programmes for cardiovascular mortality at last follow-up including odds ratios (OR) and 95% CIs. Sensitivity analysis excluding trials with smoking or drug therapy interventions.

Table S11. Network meta-analysis results comparing the effects of named dietary programmes for stroke (N = 20 RCTs) including odds ratios (OR) and 95% CIs.

Table S12. Network meta-analysis results comparing the effects of named dietary programmes for stroke (N = 19 RCTs) including odds ratios (OR) and 95% CIs. Sensitivity analysis excluding Singh 2002.

Table S13. Network meta-analysis results comparing the effects of named dietary programmes for stroke including odds ratios (OR) and 95% CIs. Sensitivity analysis excluding trials with smoking or drug therapy interventions.

Table S14. Network meta-analysis results comparing the effects of named dietary programmes for non-fatal MI (N = 27 RCTs) including odds ratios (OR) and 95% CIs.

Table S15. Network meta-analysis results comparing the effects of named dietary programmes for non-fatal MI (N = 22 RCTs) including odds ratios (OR) and 95% CIs. Sensitivity analysis excluding Singh 2002, Singh 2017, Lehmann 2011, Shea 2011, and Research Committee 1965.

Table S16. Network meta-analysis results comparing the effects of named dietary programmes for non-fatal MI including odds ratios (OR) and 95% CIs. Sensitivity analysis excluding trials with smoking or drug therapy interventions.

Table S17. Network meta-analysis results comparing the effects of named dietary programmes for unplanned cardiovascular interventions (N = 18 RCTs) including odds ratios (OR) and 95% CIs.

Table S18. Network meta-analysis results comparing the effects of named dietary programmes for unplanned cardiovascular interventions (N = 17 RCTs) including odds ratios (OR) and 95% CIs. Sensitivity analysis excluding Singh 2002.

Table S19. Network meta-analysis results comparing the effects of named dietary programmes for unplanned cardiovascular interventions including odds ratios (OR) and 95% CIs. Sensitivity analysis excluding trials with smoking or drug therapy interventions.

Table S20. Network meta-regression results adjusting for exercise co-interventions for all-cause mortality at last follow-up.

Table S21. Network meta-regression results adjusting for drug therapy co-interventions for all-cause mortality at last follow-up.

Table S22. Network meta-regression results adjusting for smoking cessation co-interventions for all-cause mortality at last follow-up.

Table S23. Network meta-regression results adjusting for psychosocial support co-interventions for all-cause mortality at last follow-up.

Table S24. Network meta-regression results adjusting for exercise co-interventions for cardiovascular mortality at last follow-up.

Table S25. Network meta-regression results adjusting for drug therapy co-interventions for cardiovascular mortality at last follow-up.

Table S26. Network meta-regression results adjusting for smoking cessation co-interventions for cardiovascular mortality at last follow-up.

Table S27. Network meta-regression results adjusting for psychosocial support co-interventions for cardiovascular mortality at last follow-up.

Table S28. Network meta-regression results adjusting for exercise co-interventions for stroke at last follow-up.

Table S29. Network meta-regression results adjusting for drug therapy co-interventions for stroke at last follow-up.

Table S30. Network meta-regression results adjusting for smoking cessation co-interventions for stroke at last follow-up.

Table S31. Network meta-regression results adjusting for psychosocial support co-interventions for stroke at last follow-up.

Table S32. Network meta-regression results adjusting for exercise co-interventions for non-fatal myocardial infarction at last follow-up.

Table S33. Network meta-regression results adjusting for drug therapy co-interventions for non-fatal myocardial infarction at last follow-up.

Table S34. Network meta-regression results adjusting for smoking cessation co-interventions for non-fatal myocardial infarction at last follow-up.

Table S35. Network meta-regression results adjusting for psychosocial support co-interventions for non-fatal myocardial infarction at last follow-up.

Table S36. Network meta-regression results adjusting for exercise co-interventions for unplanned cardiovascular interventions at last follow-up.

Table S37. Network meta-regression results adjusting for drug therapy co-interventions for unplanned cardiovascular interventions at last follow-up.

Table S38. Network meta-regression results adjusting for smoking cessation co-interventions for unplanned cardiovascular interventions at last follow-up.

Table S39. Network meta-regression results adjusting for psychosocial support co-interventions for unplanned cardiovascular interventions at last follow-up.

Table S40. Network meta-regression results adjusting for follow-up duration (in increments of 1 month) for all-cause mortality.

Table S41. Network meta-regression results showing the subgroup effect for population type on all-cause mortality.

Table S42. Network meta-regression results adjusting for intervention duration (in increments of 1 month) for all-cause mortality.

Table S43. Network meta-regression results showing the subgroup effect for intervention intensity on all-cause mortality.

Table S44. Network meta-regression results adjusting for follow-up duration (in increments of 1 month) for cardiovascular mortality.

Table S45. Network meta-regression results showing the subgroup effect for population type on cardiovascular mortality.

Table S46. Network meta-regression results adjusting for intervention duration (in increments of 1 month) for cardiovascular mortality.

Table S47. Network meta-regression results showing the subgroup effect for intervention intensity on cardiovascular mortality.

Table S48. Network meta-regression results adjusting for follow-up duration (in increments of 1 month) for stroke.

Table S49. Network meta-regression results showing the subgroup effect for population type on stroke.

Table S50. Network meta-regression results adjusting for intervention duration (in increments of 1 month) for stroke.

Table S51. Network meta-regression results showing the subgroup effect for intervention intensity on stroke.

Table S52. Network meta-regression results adjusting for follow-up duration (in increments of 1 month) for non-fatal myocardial infarction.

Table S53. Network meta-regression results showing the subgroup effect for population type on non-fatal myocardial infarction.

Table S54. Network meta-regression results adjusting for intervention duration (in increments of 1 month) for non-fatal myocardial infarction.

Table S55. Network meta-regression results showing the subgroup effect for intervention intensity on non-fatal myocardial infarction.

Table S56. Network meta-regression results adjusting for follow-up duration (in increments of 1 month) for unplanned cardiovascular interventions.

Table S57. Network meta-regression results showing the subgroup effect for population type on unplanned cardiovascular interventions.

Table S58. Network meta-regression results adjusting for intervention duration (in increments of 1 month) for unplanned cardiovascular interventions.

Table S59. Network meta-regression results showing the subgroup effect for intervention intensity on unplanned cardiovascular interventions.

Table S60. Absolute estimates for all-cause mortality prevention at 12 ( $\pm 3$ ) months (intermediate baseline risk). Named dietary programmes network meta-analysis results as risk differences (RD) per 1000 with 95% confidence interval (CI) and corresponding GRADE certainty of evidence (N = 13 RCTs).

Table S61. Absolute estimates for all-cause mortality prevention at 12 ( $\pm 3$ ) months (high baseline risk). Named dietary programmes network meta-analysis results as risk differences (RD) per 1000 with 95% confidence interval (CI) and corresponding GRADE certainty of evidence (N = 13 RCTs).

Table S62. Absolute estimates for all-cause mortality prevention at last follow-up (intermediate baseline risk). Named dietary programmes network meta-analysis results as risk differences (RD) per 1000 over 5 years with 95% confidence interval (CI) and corresponding GRADE certainty of evidence (N = 37 RCTs).

Table S63. Absolute estimates for all-cause mortality prevention at last follow-up (high baseline risk). Named dietary programmes network meta-analysis results as risk differences (RD) per 1000 over 5 years with 95% confidence interval (CI) and corresponding GRADE certainty of evidence (N = 37 RCTs).

Table S64. Absolute estimates for cardiovascular mortality prevention at last follow-up (intermediate baseline risk). Named dietary programmes network meta-analysis results as risk differences (RD) per 1000 over 5 years with 95% confidence interval (CI) and corresponding GRADE certainty of evidence (N = 22 RCTs).

Table S65. Absolute estimates for cardiovascular mortality prevention at last follow-up (high baseline risk). Named dietary programmes network meta-analysis results as risk differences (RD) per 1000 over 5 years with 95% confidence interval (CI) and corresponding GRADE certainty of evidence (N = 22 RCTs).

Table S66. Absolute estimates for stroke prevention at last follow-up (intermediate baseline risk). Named dietary programmes network meta-analysis results as risk differences (RD) per 1000 over 5 years with 95% confidence interval (CI) and corresponding GRADE certainty of evidence (N = 20 RCTs).

Table S67. Absolute estimates for stroke prevention at last follow-up (high baseline risk). Named dietary programmes network meta-analysis results as risk differences (RD) per 1000 over 5 years with 95% confidence interval (CI) and corresponding GRADE certainty of evidence (N = 20 RCTs).

Table S68. Absolute estimates for non-fatal myocardial infarction (MI) prevention at last follow-up (intermediate baseline risk). Named dietary programmes network meta-analysis results as risk differences (RD) per 1000 over 5 years with 95% confidence interval (CI) and corresponding GRADE certainty of evidence (N = 27 RCTs).

Table S69. Absolute estimates for non-fatal myocardial infarction (MI) prevention at last follow-up (high baseline risk). Named dietary programmes network meta-analysis results as risk differences (RD) per 1000 over 5 years with 95% confidence interval (CI) and corresponding GRADE certainty of evidence (N = 27 RCTs).

Table S70. Absolute estimates for unplanned cardiovascular intervention prevention at last follow-up (intermediate baseline risk). Named dietary programmes network meta-analysis results as risk differences (RD) per 1000 over 5 years with 95% confidence interval (CI) and corresponding GRADE certainty of evidence (N = 18 RCTs).

Table S71. Absolute estimates for unplanned cardiovascular intervention prevention at last follow-up (high baseline risk). Named dietary programmes network meta-analysis results as risk differences (RD) per 1000 over 5 years with 95% confidence interval (CI) and corresponding GRADE certainty of evidence (N = 18 RCTs).

Table S72. GRADE assessment for all-cause mortality (at 12 months of follow-up) in named dietary programme network.

Table S73. GRADE assessment for all-cause mortality (at last follow-up) in named dietary programme network.

Table S74. GRADE assessment for cardiovascular mortality (at last follow-up) in named dietary programme network.

Table S75. GRADE assessment for stroke (at last follow-up) in named dietary programme network.

Table S76. GRADE assessment for non-fatal myocardial infarction (at last follow-up) in named dietary programme network.

Table S77. GRADE assessment for unplanned cardiovascular interventions (at last follow-up) in named dietary programme network.

References.

## Text S1. Further description of GRADE approach.

### *Baseline risks*

We estimated baseline risks from a 2012 meta-analysis of statin trials by the Cholesterol Treatment Trialists' (CTT) Collaboration.[1] We chose this as it reported risks on all our outcomes stratified by baseline predicted 5-year cardiovascular event risk (five categories: <5%, ≥5% to <10%, ≥10% to <20%, ≥20% to <30%, ≥30%). For the intermediate risk group, we chose data from the ≥5% to <10% group. This matches the observed 5-year cardiovascular event risks seen in the large primary prevention trials included in our systematic review and also fits with what is considered intermediate risk in primary prevention guidelines.[2] For the high risk group, we used data from the ≥20% to <30% group, as it came closest to matching the 5-year coronary event rate of the CALIBER cohort of stable coronary patients ( $n = 102\ 023$ ), 44.7% of which had stable angina, 33.8% of which had acute coronary syndrome, and 21.5% of which other coronary heart disease.[3] For our 12 month follow-up outcomes, the control group per annum risk reported in the CTT meta-analysis was used. For our last follow-up outcomes, a 5-year event risk was estimated based on the per annum risk.

| <b>Risk stratum</b>                     | <b>5-year control group event risk (baseline risk estimate)</b> |                                |                                |                                |                                 |
|-----------------------------------------|-----------------------------------------------------------------|--------------------------------|--------------------------------|--------------------------------|---------------------------------|
|                                         | <i>All-cause Mortality</i>                                      | <i>CV Mortality</i>            | <i>Non-fatal MI</i>            | <i>Stroke</i>                  | <i>CV Intervention</i>          |
| Intermediate (5-10% 5-yr CV event risk) | 62 per 1000<br>1.27% per annum                                  | 29 per 1000<br>0.59% per annum | 33 per 1000<br>0.67% per annum | 21 per 1000<br>0.43% per annum | 31 per 1000<br>0.62% per annum  |
| High (20-30% 5-yr CV event risk)        | 143 per 1000<br>3.04% per annum                                 | 92 per 1000<br>1.92% per annum | 85 per 1000<br>1.77% per annum | 48 per 1000<br>0.97% per annum | 145 per 1000<br>3.08% per annum |

### *Description of GRADE approach*

First, effect estimates for all direct comparisons were rated. All effect estimates, being from RCTs, began with high certainty of evidence but could be rated down one or two levels for each of risk of bias, inconsistency, indirectness, or publication bias.

To evaluate risk of bias, we assigned all studies an overall risk of bias. A low overall risk rating was given to studies determined to be at low risk of bias in each of the three following domains: random sequence generation, allocation concealment, and missing participant outcome data. Use of these three domains is consistent with past systematic reviews and with meta-epidemiological research.[4,5] Comparisons where the effect estimate would be substantially changed by only including low overall risk of bias studies were rated down for risk of bias. This was assessed first by visual inspection. If visual inspection was inconclusive, a subgroup analysis by risk of bias status with test of interaction was performed.

Direct comparisons were rated down for inconsistency if evidence of substantial heterogeneity between trials was noted. To determine this, we considered  $I^2$  values and visually inspected forest plots for signs of inconsistent results.

Indirectness was assessed by comparing the populations and interventions of studied dietary programmes to the populations and interventions defined in our protocol.

Publication bias was assessed by visual inspection of funnel plots and calculating Harbord's small study test.[6] Comparisons were rated down if evidence of publication bias was present.

For indirect effect estimates, the starting certainty was the lowest certainty of the direct comparisons of which it was composed in the dominant lowest order loop. Indirect comparisons could be further rated down if evidence of intransitivity were present. We rated down if the population in one direct comparison varied from the population in the other comparison in such a

way that made differences in effect modification likely (e.g., imbalance in an effect modifier identified by network meta-regression, or if the minimal intervention group in two trials followed very different diets).

The baseline certainty of the network estimate was the certainty of the estimate (direct or indirect) which contributed most to the network estimate. Rating down of this certainty could occur due to incoherence (disagreement between direct and indirect estimates) or due to imprecision.

For imprecision, the first step was to decide whether we were rating our certainty in the presence of an effect, or in the presence of little or no effect. We rated for the latter only in the following case: the result was not statistically significant and the point estimate suggested no or trivial benefit. In all other cases, we rated for certainty in the presence of an effect.

No statistically significant estimate was rated down (because we used a null decision threshold). If a finding was not statistically significant and its point estimate and 95% CI were only compatible with a trivial benefit and a trivial harm, we rated for the presence of little or no effect, and accordingly did not rate down because the 95% CI excluded non-trivial benefit/harm.

If a finding was not statistically significant but the point estimate indicated benefit, it was rated down one level as long as its 95% CI was only compatible with a trivial harm. It was rated down two levels if compatible with non-trivial harm.

If a finding was not statistically significant, its point estimate indicated harm, and the 95% CI was compatible only with a trivial benefit, it was not rated down if the comparator was minimal intervention, because this would not change the decision to not use the dietary program. If the comparator was another dietary program, it was rated down one level (because this could change the decision to use the dietary program over the reference). If the point estimate indicated harm



but the 95% CI was compatible with a non-trivial benefit, it was rated down one level if the comparator was minimal intervention, and two levels if the comparator was another dietary program.

If a finding was not statistically significant and its point estimate was close to the null, but its 95% CI was compatible with a non-trivial benefit or a non-trivial harm, it was rated down one level. The exception is if the comparator was minimal intervention and the 95% CI was only compatible with a non-trivial harm (we did not rate down as this would not change the decision to not use the dietary program). If the point estimate was close to the null and its 95% CI was compatible with both a non-trivial benefit and a non-trivial harm, it was rated down one level if the comparator was minimal intervention, and two levels if the comparator was another dietary program.

To establish trivial benefit and trivial harm, we used thresholds from a previous dietary guideline, which were based on consultation with a guideline panel that included members of the public.[7] For fatal outcomes, <10 events per 1000 were considered to be trivial. For non-fatal outcomes, <20 per 1000 were considered trivial. For mixed fatal and non-fatal outcomes, <15 per 1000 were considered trivial.

#### *Interpreting league tables*

An odds ratio (OR) < 1, or a risk difference (RD) < 0, signifies that the dietary program in the bottom-right is superior (i.e., an OR > 1 or RD > 0 favors the diet in the column).

Text S2. Original search strategy (November 23, 2016).

The MEDLINE search strategy is shown below. Search strategies for other databases were similar and are available upon request.

**OVID MEDLINE**

| #  | Searches                                                                                                                                                                    | Results |
|----|-----------------------------------------------------------------------------------------------------------------------------------------------------------------------------|---------|
| 1  | (atkins and (diet* or weight* or obes*)).mp.                                                                                                                                | 315     |
| 2  | (ediet* and (diet* or weight* or obes*)).mp.                                                                                                                                | 4       |
| 3  | (dukan and (diet* or weight* or obes*)).mp.                                                                                                                                 | 4       |
| 4  | (mediterranean and (diet* or weight* or obes*)).mp.                                                                                                                         | 6408    |
| 5  | ((paleolithic or paleo) and (diet* or weight* or obes*)).mp.                                                                                                                | 244     |
| 6  | (zone adj3 (diet* or weight* or obes*)).mp.                                                                                                                                 | 227     |
| 7  | (south beach and (diet* or weight* or obes*)).mp.                                                                                                                           | 23      |
| 8  | (ornish and (diet* or weight* or obes*)).mp.                                                                                                                                | 38      |
| 9  | (volumetrics and (diet* or weight* or obes*)).mp.                                                                                                                           | 38      |
| 10 | ("protein power" and (diet* or weight* or obes*)).mp.                                                                                                                       | 4       |
| 11 | (nutrisystem and (diet* or weight* or obes*)).mp.                                                                                                                           | 7       |
| 12 | ((("weight watcher" or weightwatcher*) and (diet* or weight* or obes*)).mp.                                                                                                 | 124     |
| 13 | ((("jenny craig" or jennycraig*) and (diet* or weight* or obes*)).mp.                                                                                                       | 11      |
| 14 | ((("rosemary conley" or "eat yourself thin") and (diet* or weight* or obes*)).mp.                                                                                           | 6       |
| 15 | ("slimming world" and (diet* or weight* or obes*)).mp.                                                                                                                      | 21      |
| 16 | ("biggest loser" and (diet* or weight* or obes*)).mp.                                                                                                                       | 21      |
| 17 | ((dash or "dietary approach* to stop* hypertension") and (diet* or weight* or obes*)).mp.                                                                                   | 938     |
| 18 | ("Lifestyle, Exercise, Attitudes, Relationships, and Nutrition" and (diet* or weight* or obes*)).mp.                                                                        | 6       |
| 19 | (learn diet* or learn program*).mp.                                                                                                                                         | 17      |
| 20 | Diet, Carbohydrate-Restricted/                                                                                                                                              | 1249    |
| 21 | ((low carb* or carb* restrict* or restrict* carb*) and diet*).mp.                                                                                                           | 3166    |
| 22 | Diet, Sodium-Restricted/                                                                                                                                                    | 6476    |
| 23 | ((low sodium or low salt or salt restrict* or salt free or saltless or sodium free or sodium restrict* or reduc* salt or reduc* sodium or natrium restrict*) and diet*).mp. | 10631   |
| 24 | Diet, Mediterranean/                                                                                                                                                        | 2328    |
| 25 | Diet, Fat-Restricted/                                                                                                                                                       | 3657    |
| 26 | ((low fat or fat free or fat restrict* or restrict* fat or lipid restrict* or restrict* lipid or low lipid) and diet*).mp.                                                  | 13907   |
| 27 | Diet Fads/                                                                                                                                                                  | 736     |
| 28 | ((fad or fads) adj3 (diet* or food or foods)).mp.                                                                                                                           | 846     |
| 29 | or/1-28                                                                                                                                                                     | 34655   |
| 30 | (randomized controlled trial or pragmatic clinical trial).pt.                                                                                                               | 469880  |
| 31 | controlled clinical trial.pt.                                                                                                                                               | 95071   |
| 32 | randomized.ab.                                                                                                                                                              | 404284  |
| 33 | placebo.ab.                                                                                                                                                                 | 191971  |

|    |                                                                                                     |         |
|----|-----------------------------------------------------------------------------------------------------|---------|
| 34 | clinical trials as topic.sh.                                                                        | 189498  |
| 35 | randomly.ab.                                                                                        | 285346  |
| 36 | trial.ti.                                                                                           | 178876  |
| 37 | or/30-36                                                                                            | 1151564 |
| 38 | exp animals/ not humans.sh.                                                                         | 4669151 |
| 39 | 37 not 38                                                                                           | 1061936 |
| 40 | 29 and 39                                                                                           | 5836    |
| 41 | limit 40 to english language                                                                        | 5665    |
| 42 | mortality/                                                                                          | 40706   |
| 43 | ("case fatality rate" or "case fatality rates" or "death rate*" or mortalities or mortality).tw,kf. | 648624  |
| 44 | 41 and (42 or 43) [diets, RCTs, Mortality]                                                          | 257     |
| 45 | cardiovascular diseases/ or exp heart diseases/ or exp vascular diseases/                           | 2216925 |
| 46 | (coronar* adj5 (bypas* or graft* or disease* or event*)).mp.                                        | 295834  |
| 47 | (cerebrovasc* or cardiovasc* or mortal* or angina* or stroke or strokes).mp.                        | 1422349 |
| 48 | (myocard* adj5 (infarct* or revascular* or ischaemi* or ischemi*)).mp.                              | 288889  |
| 49 | (morbid* adj5 (heart* or coronar* or ischaem* or ischem* or myocard*)).mp.                          | 5807    |
| 50 | (vascular* adj5 (peripheral* or disease* or complication*)).mp.                                     | 116453  |
| 51 | (heart* adj5 (disease* or attack* or bypass*)).mp.                                                  | 275281  |
| 52 | or/45-51                                                                                            | 3106081 |
| 53 | 41 and 52 [diets, RCTs, MI or stroke]                                                               | 2298    |
| 54 | 44 or 53                                                                                            | 2299    |
| 55 | remove duplicates from 54                                                                           | 1983    |

Text S3. Search update (April 18, 2020).

**Ovid MEDLINE**

| #  | Searches                                                                          | Results |
|----|-----------------------------------------------------------------------------------|---------|
| 1  | (atkins and (diet* or weight* or obes*)).mp.                                      | 374     |
| 2  | (ediet* and (diet* or weight* or obes*)).mp.                                      | 4       |
| 3  | (dukan and (diet* or weight* or obes*)).mp.                                       | 4       |
| 4  | (mediterranean and (diet* or weight* or obes*)).mp.                               | 8830    |
| 5  | ((paleolithic or paleo) and (diet* or weight* or obes*)).mp.                      | 382     |
| 6  | (zone adj3 (diet* or weight* or obes*)).mp.                                       | 257     |
| 7  | (south beach and (diet* or weight* or obes*)).mp.                                 | 21      |
| 8  | (ornish and (diet* or weight* or obes*)).mp.                                      | 32      |
| 9  | (volumetrics and (diet* or weight* or obes*)).mp.                                 | 50      |
| 10 | ("protein power" and (diet* or weight* or obes*)).mp.                             | 4       |
| 11 | (nutrisystem and (diet* or weight* or obes*)).mp.                                 | 6       |
| 12 | ((("weight watcher" or weightwatcher*) and (diet* or weight* or obes*)).mp.       | 130     |
| 13 | ((("jenny craig" or jennycraig*) and (diet* or weight* or obes*)).mp.             | 10      |
| 14 | ((("rosemary conley" or "eat yourself thin") and (diet* or weight* or obes*)).mp. | 4       |

|    |                                                                                                                                                                             |         |
|----|-----------------------------------------------------------------------------------------------------------------------------------------------------------------------------|---------|
| 15 | ("slimming world" and (diet* or weight* or obes*)).mp.                                                                                                                      | 21      |
| 16 | ("biggest loser" and (diet* or weight* or obes*)).mp.                                                                                                                       | 24      |
| 17 | ((dash or "dietary approach* to stop* hypertension") and (diet* or weight* or obes*)).mp.                                                                                   | 1260    |
| 18 | ("Lifestyle, Exercise, Attitudes, Relationships, and Nutrition" and (diet* or weight* or obes*)).mp.                                                                        | 4       |
| 19 | (learn diet* or learn program*).mp.                                                                                                                                         | 20      |
| 20 | diet, carbohydrate-restricted/ or diet, high-protein low-carbohydrate/ or diet, ketogenic/                                                                                  | 2674    |
| 21 | ((low carb* or carb* restrict* or restrict* carb*) and diet*).mp.                                                                                                           | 3923    |
| 22 | Diet, Sodium-Restricted/                                                                                                                                                    | 6235    |
| 23 | ((low sodium or low salt or salt restrict* or salt free or saltless or sodium free or sodium restrict* or reduc* salt or reduc* sodium or natrium restrict*) and diet*).mp. | 10382   |
| 24 | Diet, Mediterranean/                                                                                                                                                        | 3316    |
| 25 | Diet, Fat-Restricted/                                                                                                                                                       | 3638    |
| 26 | ((low fat or fat free or fat restrict* or restrict* fat or lipid restrict* or restrict* lipid or low lipid) and diet*).mp.                                                  | 14688   |
| 27 | Diet Fads/                                                                                                                                                                  | 703     |
| 28 | ((fad or fads) adj3 (diet* or food or foods)).mp.                                                                                                                           | 833     |
| 29 | or/1-28                                                                                                                                                                     | 39424   |
| 30 | (randomized controlled trial or pragmatic clinical trial).pt.                                                                                                               | 504611  |
| 31 | controlled clinical trial.pt.                                                                                                                                               | 93621   |
| 32 | randomized.ab.                                                                                                                                                              | 476153  |
| 33 | placebo.ab.                                                                                                                                                                 | 206861  |
| 34 | clinical trials as topic.sh.                                                                                                                                                | 190790  |
| 35 | randomly.ab.                                                                                                                                                                | 331201  |
| 36 | trial.ti.                                                                                                                                                                   | 216564  |
| 37 | or/30-36                                                                                                                                                                    | 1281904 |
| 38 | exp animals/ not humans.sh.                                                                                                                                                 | 4690983 |
| 39 | 37 not 38                                                                                                                                                                   | 1179387 |
| 40 | 29 and 39                                                                                                                                                                   | 6418    |
| 41 | limit 40 to english language                                                                                                                                                | 6223    |
| 42 | mortality/                                                                                                                                                                  | 43514   |
| 43 | ("case fatality rate" or "case fatality rates" or "death rate*" or mortalities or mortality).tw,kf.                                                                         | 768922  |
| 44 | 41 and (42 or 43) [diets, RCTs, Mortality]                                                                                                                                  | 314     |
| 45 | cardiovascular diseases/ or exp heart diseases/ or exp vascular diseases/                                                                                                   | 2348798 |
| 46 | (coronar* adj5 (bypas* or graft* or disease* or event*)).mp.                                                                                                                | 312391  |
| 47 | (cerebrovasc* or cardiovasc* or mortal* or angina* or stroke or strokes).mp.                                                                                                | 1939800 |
| 48 | (myocardi* adj5 (infarct* or revascular* or ischaemi* or ischemi*)).mp.                                                                                                     | 307551  |
| 49 | (morbid* adj5 (heart* or coronar* or ischaem* or ischem* or myocard*)).mp.                                                                                                  | 6459    |
| 50 | (vascular* adj5 (peripheral* or disease* or complication*)).mp.                                                                                                             | 123493  |
| 51 | (heart* adj5 (disease* or attack* or bypass*)).mp.                                                                                                                          | 293874  |
| 52 | or/45-51                                                                                                                                                                    | 3654195 |
| 53 | 41 and 52 [diets, RCTs, MI or stroke]                                                                                                                                       | 2447    |

|    |                                                                                                                                                                                                                                                              |         |
|----|--------------------------------------------------------------------------------------------------------------------------------------------------------------------------------------------------------------------------------------------------------------|---------|
| 54 | diabetes mellitus/ or diabetes mellitus, type 1/ or diabetes mellitus, type 2/ or diabetes, gestational/ or prediabetic state/                                                                                                                               | 311535  |
| 55 | (diabetes or diabetic* or "dm 1" or "dm 2" or "glucose tolerance impairment" or "iddm" or "impaired glucose tolerance" or "mckusick 22210" or "mody" or "niddm" or prediabetes or "prediabetic stage" or "prediabetic state" or "prediabetic states").tw,kf. | 629363  |
| 56 | 54 or 55                                                                                                                                                                                                                                                     | 667119  |
| 57 | 41 and 56 [diets, RCTs, diabetes]                                                                                                                                                                                                                            | 932     |
| 58 | 44 or 53 or 57                                                                                                                                                                                                                                               | 2961    |
| 59 | limit 58 to ed=20160716-20200418                                                                                                                                                                                                                             | 589     |
| 60 | ("20160718" or "20160719" or "20160720" or "20160721" or "20160722" or "20160723" or "20160724" or "20160725" or "20160726" or "20160727" or "20160728" or "20160729" or "20160730" or "20160731").dt.                                                       | 48171   |
| 61 | ("201608*" or "201609*" or "201610*" or "201611*" or "201612*" or "2017*" or "2018*" or "2019*" or "2020*").dt.                                                                                                                                              | 4386206 |
| 62 | 60 or 61                                                                                                                                                                                                                                                     | 4434377 |
| 63 | 58 and 62                                                                                                                                                                                                                                                    | 560     |
| 64 | 59 or 63                                                                                                                                                                                                                                                     | 723     |

#### Text S4. Search update (September 4, 2021).

The same search strategy used in the original search was used, along with the same limitation strategy used in the first update, but with the new date range being from April 18, 2020 to September 4, 2021.

Table S1. Characteristics of included studies.

| <b>Study</b>            | <b>Country</b> | <b>Network comparisons</b>                                                    | <b>Non-dietary components of intervention</b>                                  | <b>Population description</b>                                                                | <b>Number of patients</b> | <b>Follow-up, yr</b> | <b>Overall risk of bias</b> |
|-------------------------|----------------|-------------------------------------------------------------------------------|--------------------------------------------------------------------------------|----------------------------------------------------------------------------------------------|---------------------------|----------------------|-----------------------------|
| Shea (TONE) 2011[8,9]   | USA            | Low fat vs. Combined low fat-low sodium vs. minimal (non-dietary programming) | —                                                                              | Hypertension and obesity (primary prevention)                                                | 585                       | 12.7                 | Low                         |
| Zwisler 2005[10,11]     | Denmark        | Low fat vs. minimal (usual care)                                              | Exercise, drug therapy, smoking cessation                                      | CHF, IHD, or high risk of IHD (secondary prevention)                                         | 770                       | 1.0                  | Low                         |
| Look AHEAD 2013[12,13]  | USA            | Low fat vs. minimal (non-dietary programming)                                 | Exercise, psychosocial support                                                 | Type 2 diabetes mellitus and overweight or obese (primary prevention)                        | 5145                      | 9.6                  | Low                         |
| Burr (DART) 1989[14–16] | England        | Low fat vs. minimal (no advice)                                               | —                                                                              | Post-MI (secondary prevention)                                                               | 2033                      | 2.0                  | High                        |
| Watts (STARS) 1992[17]  | UK             | Low fat vs. minimal (no advice)                                               | Half of low fat group also randomly allocated to cholestyramine (drug therapy) | Referred for coronary angiography to investigate CHD (secondary prevention)                  | 74                        | 3.0                  | High                        |
| Gaede 2003[18,19]       | Denmark        | Low fat vs. minimal (usual care)                                              | Exercise, drug therapy, smoking cessation                                      | Type 2 diabetes mellitus with microalbuminuria (primary prevention)                          | 160                       | 7.8                  | Low                         |
| Lisspers 1999[20–22]    | Sweden         | Low fat vs. minimal (usual care)                                              | Exercise, smoking cessation, psychosocial support                              | Recent PTCA for angina (secondary prevention)                                                | 87                        | 6.5                  | Low                         |
| Vestfold 2003[23]       | Norway         | Low fat vs. minimal (usual care)                                              | Exercise, smoking cessation, psychosocial support                              | Patients admitted for acute MI, unstable angina, or after CABG or PCI (secondary prevention) | 197                       | 2.0                  | High                        |

|                                   |                     |                                                            |                                              |                                                                                                                |      |      |      |
|-----------------------------------|---------------------|------------------------------------------------------------|----------------------------------------------|----------------------------------------------------------------------------------------------------------------|------|------|------|
| Cupples<br>1994[24,25]            | Northern<br>Ireland | Low fat vs.<br>minimal (no<br>advice)                      | Exercise, smoking<br>cessation               | Angina (secondary<br>prevention)                                                                               | 688  | 2.0  | Low  |
| Greaves<br>2015[26]               | UK                  | Low fat vs.<br>minimal<br>(minimal<br>dietary advice)      | Exercise                                     | BMI > 28 with other CV<br>risk factors (primary<br>prevention)                                                 | 108  | 1.0  | Low  |
| Hjermann<br>1981[27,28]           | Norway              | Low fat vs.<br>minimal (no<br>advice)                      | Smoking cessation                            | Cholesterol 7.5 – 9.8<br>mmol/l (290 – 379 mg/dl)<br>with elevated coronary risk<br>score (primary prevention) | 1232 | 8.5  | High |
| Murchie<br>2003[29–31]            | Scotland            | Low fat vs.<br>minimal (usual<br>care)                     | Exercise, drug therapy,<br>smoking cessation | CHD (secondary<br>prevention)                                                                                  | 1343 | 10.2 | High |
| Haskell<br>1994[32]               | USA                 | Very low fat<br>vs. minimal<br>(usual care)                | Exercise, drug therapy,<br>smoking cessation | Receiving coronary<br>arteriography (secondary<br>prevention)                                                  | 300  | 4.0  | High |
| Howard 2006<br>(WHI)[33–36]       | USA                 | Very low fat<br>vs. minimal<br>(minimal<br>dietary advice) | —                                            | Prior CV disease<br>(secondary prevention)                                                                     | 1656 | 17.0 | Low  |
| Research<br>Committee<br>1965[37] | England             | Very low fat<br>vs. minimal<br>(no advice)                 | —                                            | First MI in past 3 months<br>(secondary prevention)                                                            | 252  | 3.0  | High |
| Wallner<br>1999[38]               | Austria             | Very low fat<br>vs. minimal<br>(minimal<br>dietary advice) | —                                            | CAD (secondary<br>prevention)                                                                                  | 60   | 2.2  | High |
| Moy 2001[39]                      | USA                 | Very low fat<br>vs. minimal<br>(minimal<br>dietary advice) | —                                            | Siblings of premature CHD<br>patients, with another risk<br>factor (primary prevention)                        | 235  | 2.0  | High |

|                          |           |                                                                  |                                           |                                                                                    |      |      |      |
|--------------------------|-----------|------------------------------------------------------------------|-------------------------------------------|------------------------------------------------------------------------------------|------|------|------|
| Schuler 1992[40,41]      | Germany   | Very low fat vs. minimal (minimal dietary advice)                | Exercise, psychosocial support            | Coronary angiography for angina (secondary prevention)                             | 113  | 6.0  | High |
| Weber 2019[42,43]        | Brazil    | Combined low fat-low sodium vs. minimal (minimal dietary advice) | —                                         | Prior CV disease (secondary prevention)                                            | 2521 | 3.5  | Low  |
| Ueki 2017[44]            | Japan     | Combined low fat-low sodium vs. minimal (usual care)             | Exercise, drug therapy, smoking cessation | Type 2 diabetes, with either hypertension and/or dyslipidemia (primary prevention) | 2540 | 8.5  | Low  |
| Woodhill 1978[45,46]     | Australia | Modified fat vs. minimal (no advice)                             | —                                         | Coronary disease (secondary prevention)                                            | 458  | 3.3  | Low  |
| MRC Soybean Oil 1968[47] | UK        | Modified fat vs. minimal (no advice)                             | —                                         | Discharged after admission for first MI (secondary prevention)                     | 393  | 4.0  | High |
| Leren 1970[48,49]        | Norway    | Modified fat vs. minimal (no advice)                             | —                                         | 1-2 years after first MI (secondary prevention)                                    | 412  | 11.0 | High |
| Rose 1965[50]            | UK        | Modified fat vs. minimal (no advice)                             | —                                         | MI or angina (secondary prevention)                                                | 80   | 2.0  | High |
| Tuttle 2008[51]          | USA       | Mediterranean vs. low fat                                        | —                                         | First MI in past 6 weeks (secondary prevention)                                    | 101  | 3.8  | High |
| PREDIMED[52–56]          | Spain     | Mediterranean vs. low fat                                        | —                                         | Type 2 diabetes mellitus or multiple risk factors (primary prevention)             | 7447 | 4.8  | High |
| Lehmann 2011[57–59]      | Germany   | Mediterranean vs. minimal (usual dietary advice)                 | Psychosocial support                      | CAD (secondary prevention)                                                         | 104  | 3.0  | Low  |



|                                 |         |                                                    |                                                                 |                                                                                |      |     |      |
|---------------------------------|---------|----------------------------------------------------|-----------------------------------------------------------------|--------------------------------------------------------------------------------|------|-----|------|
| de Lorgeril 1994[60–66]         | France  | Mediterranean vs. minimal (no advice)              | —                                                               | First MI in past 6 months (secondary prevention)                               | 605  | 3.8 | High |
| Gianuzzi 2008[67]               | Italy   | Mediterranean vs. minimal (usual care)             | Exercise, smoking cessation, psychosocial support               | MI in past 3 months (secondary prevention)                                     | 3241 | 3.0 | Low  |
| Lapetra 2017[68]                | Spain   | Mediterranean vs. low fat                          | —                                                               | Hypertension and one other CV risk factor (primary prevention)                 | 180  | 2.1 | High |
| Marcos-Forniol 2018[69]         | Spain   | Mediterranean vs. minimal (usual care)             | Exercise, drug therapy, psychosocial support                    | Acute coronary syndrome (secondary prevention)                                 | 106  | 3.0 | High |
| Matz 2015[70]                   | Austria | Mediterranean vs. minimal (usual care)             | Exercise, drug therapy, smoking cessation, psychosocial support | Stroke in past 3 months (secondary prevention)                                 | 190  | 2.0 | High |
| Munoz 2007[71]                  | Spain   | Mediterranean vs. minimal (usual care)             | Exercise, drug therapy, smoking cessation                       | MI or angina in past 6 years (secondary prevention)                            | 983* | 3.0 | High |
| Singh 1992 (Singh 2017) [72,73] | India   | Mediterranean vs. low fat                          | —                                                               | MI in past 24 hours (secondary prevention)                                     | 406  | 2.0 | High |
| Singh 2002[74]                  | India   | Mediterranean vs. low fat                          | —                                                               | At least one risk factor for CAD, or angina or prior MI (secondary prevention) | 1000 | 2.0 | High |
| Søndergaard 2003[75]            | Denmark | Mediterranean vs. minimal (minimal dietary advice) | —                                                               | IHD and elevated cholesterol (secondary prevention)                            | 131  | 1.0 | High |
| Toobert 2000[76,77]             | USA     | Ornish vs. minimal (usual care)                    | Exercise, smoking cessation, psychosocial support               | CHD (secondary prevention)                                                     | 25   | 2.0 | High |
| Ornish 1990[78–80]              | USA     | Ornish vs. minimal (usual care)                    | Exercise, smoking cessation, psychosocial support               | Coronary atherosclerosis (secondary prevention)                                | 35   | 5.0 | High |

|                       |             |                                       |                      |                                                                             |     |      |      |
|-----------------------|-------------|---------------------------------------|----------------------|-----------------------------------------------------------------------------|-----|------|------|
| Sebregts<br>2003[81]  | Netherlands | Ornish vs.<br>minimal (usual<br>care) | Psychosocial support | Admitted to hospital with<br>acute MI or for CABG<br>(secondary prevention) | 171 | 0.75 | High |
| Hutchison<br>1983[82] | Canada      | Pritikin vs. low<br>fat               | —                    | Peripheral artery disease<br>(secondary prevention)                         | 45  | 1.0  | High |

\*Cluster-randomized trial. Effective sample size estimated to be 319.

BMI, body-mass index. CABG, coronary artery bypass graft. CAD, coronary artery disease. CHD, coronary heart disease. CHF, congestive heart failure. CV, cardiovascular. IHD, ischemic heart disease. MI, myocardial infarction. PCI, percutaneous coronary intervention. PTCA, percutaneous transluminal coronary angioplasty

Table S2. Excluded articles with reasons for exclusion.

| <b>Article</b>                | <b>Reason</b>               |
|-------------------------------|-----------------------------|
| NCT01954472 (EDP8)[83]        | Combined with another study |
| NCT00924937 (CORDIOPREV)[84]  | Ongoing                     |
| NCT02481466 (PortfolioEx)[85] | Ongoing                     |
| NCT02960711 (MeMeMe)[86]      | Ongoing                     |
| NCT03053843 (PREDIMAR)[87]    | Ongoing                     |
| NCT04011800 (PRAGUE-25)[88]   | Ongoing                     |
| NCT04873167[89]               | Ongoing                     |
| Estruch 2013[90]              | Retracted                   |
| Wood 2008[91]                 | Unavailable data            |
| Abshire 2015[92]              | Wrong design                |
| Aldana 2003[93]               | Wrong design                |
| Al-Ghamdi 2018[94]            | Wrong design                |
| Alpert 2011[95]               | Wrong design                |
| Anonymous 2003[96]            | Wrong design                |
| Anonymous 2016[97]            | Wrong design                |
| Anonymous 2018[98]            | Wrong design                |
| Anonymous 2018[99]            | Wrong design                |
| Antony 2011[100]              | Wrong design                |
| Baker 2011[101]               | Wrong design                |
| Battino 2019[102]             | Wrong design                |
| Becerra-Tomas 2020[103]       | Wrong design                |
| Bemelmans 2002[104]           | Wrong design                |
| Bloomfield 2015[105]          | Wrong design                |
| Bulpitt 2005[106]             | Wrong design                |
| Chair 2003[107]               | Wrong design                |
| Chiavaroli 2019[108]          | Wrong design                |
| Chlebowski 2002[109]          | Wrong design                |
| Corella 2013[110]             | Wrong design                |
| d'Almeida 2018[111]           | Wrong design                |
| Dattilo 1994[112]             | Wrong design                |
| de Lorgeril 2011[113]         | Wrong design                |
| Dinu 2017[114]                | Wrong design                |
| Domenech 2010[115]            | Wrong design                |
| Douglas 1999[116]             | Wrong design                |
| Drouin-Chartier 2016[117]     | Wrong design                |
| Fontecha 2019[118]            | Wrong design                |
| Georgousopoulou 2017[119]     | Wrong design                |
| Goetz-Perry 2006[120]         | Wrong design                |
| Grosso 2017[121]              | Wrong design                |

|                                     |              |
|-------------------------------------|--------------|
| Guasch-Ferre 2013[122]              | Wrong design |
| Guasch-Ferre 2014[123]              | Wrong design |
| Henríquez-Sánchez 2016[124]         | Wrong design |
| Hiser 1995[125]                     | Wrong design |
| Holme 2016[126]                     | Wrong design |
| Howard 2006 (abstract summary)[127] | Wrong design |
| Kerley 2019[128]                    | Wrong design |
| Khan 2019[129]                      | Wrong design |
| Kontogianni 2014[130]               | Wrong design |
| Lagiou 2006[131]                    | Wrong design |
| Liyanage 2016[132]                  | Wrong design |
| Lopaschuk 2006[133]                 | Wrong design |
| Ma 2017[134]                        | Wrong design |
| Martinez-Gonzalez 2015[135]         | Wrong design |
| Martínez-González 2015[136]         | Wrong design |
| Martinez-Gonzalez 2018[137]         | Wrong design |
| Martinez-Gonzalez 2019[138]         | Wrong design |
| Mirzaee 2017[139]                   | Wrong design |
| Mirzaee 2017[140]                   | Wrong design |
| Mokhtari 2015[141]                  | Wrong design |
| Morgan 1979[142]                    | Wrong design |
| Nakamura 2014[143]                  | Wrong design |
| Newberry 2018[144]                  | Wrong design |
| Niebauer 1995[145]                  | Wrong design |
| Paisey 1995[146]                    | Wrong design |
| Panagiotakos 2007[147]              | Wrong design |
| Panagiotakos 2008[148]              | Wrong design |
| Panagiotakos 2014[149]              | Wrong design |
| Paradis 1999[150]                   | Wrong design |
| Parrinello 2009[151]                | Wrong design |
| Rees 2013[152]                      | Wrong design |
| Ross 2013[153]                      | Wrong design |
| Sánchez-Sánchez 2020[154]           | Wrong design |
| Schröder 2014[155]                  | Wrong design |
| Shvetsov 2016[156]                  | Wrong design |
| Soman 2005[157]                     | Wrong design |
| Stranges 2019[158]                  | Wrong design |
| Tops 2006[159]                      | Wrong design |
| Torres 2010[160]                    | Wrong design |
| Trichopoulos 2004[161]              | Wrong design |
| Turgeon 2012[162]                   | Wrong design |
| Vrentzos 2004[163]                  | Wrong design |
| Wright 2017[164]                    | Wrong design |

|                                      |                    |
|--------------------------------------|--------------------|
| Yancy 2003[165]                      | Wrong design       |
| Barzi 2020[166]                      | Wrong intervention |
| Burr 2003[167]                       | Wrong intervention |
| Chang 2006[168]                      | Wrong intervention |
| CSSS 2007[169]                       | Wrong intervention |
| Edelman 2006[170]                    | Wrong intervention |
| Gialluria 2009[171]                  | Wrong intervention |
| Hamalainen 1995[172]                 | Wrong intervention |
| Heller 1988[173]                     | Wrong intervention |
| Horie 2016[174]                      | Wrong intervention |
| Lear 2006[175]                       | Wrong intervention |
| Licata 2003[176]                     | Wrong intervention |
| Manchanda 2000[177]                  | Wrong intervention |
| Morgan 1978[178]                     | Wrong intervention |
| Oldenburg 1995[179]                  | Wrong intervention |
| Paterna 2011[180]                    | Wrong intervention |
| Philipson 2010[181]                  | Wrong intervention |
| Philipson 2013[182]                  | Wrong intervention |
| PRECOR 1991[183]                     | Wrong intervention |
| Redfern 2009[184]                    | Wrong intervention |
| RIS 1998[185]                        | Wrong intervention |
| Salminen 2006[186]                   | Wrong intervention |
| Smeulders 2009[187]                  | Wrong intervention |
| Sundin 2003[188]                     | Wrong intervention |
| TOHP II 1997[189]                    | Wrong intervention |
| Wister 2007[190]                     | Wrong intervention |
| Bennett 2012[191]                    | Wrong intervention |
| Boesch 2005[192]                     | Wrong intervention |
| Brensike 1984[193]                   | Wrong intervention |
| Cook 2016[194]                       | Wrong intervention |
| Ericsson 1997[195]                   | Wrong intervention |
| GISSI 2000[196]                      | Wrong intervention |
| Kato 2016[197]                       | Wrong intervention |
| Levy 1987[198]                       | Wrong intervention |
| Mueller 2007[199]                    | Wrong intervention |
| Müller 2009[200]                     | Wrong intervention |
| NCT00127452 (Alpha Omega Trial)[201] | Wrong intervention |
| NCT00212017[202]                     | Wrong intervention |
| NCT00410020[203]                     | Wrong intervention |
| NCT00781950 (FLAXPAD)[204]           | Wrong intervention |
| NCT00973258 (FIT)[205]               | Wrong intervention |
| NCT01245686 (Heart to Health)[206]   | Wrong intervention |
| NCT02251834 (HISSPI)[207]            | Wrong intervention |

|                               |                    |
|-------------------------------|--------------------|
| NCT02323802[208]              | Wrong intervention |
| NCT02591394 (STEPS)[209]      | Wrong intervention |
| NCT03789409[210]              | Wrong intervention |
| NCT03835923 (LeIKD)[211]      | Wrong intervention |
| NCT04052672 (DEFINIT-P)[212]  | Wrong intervention |
| NCT04291690 (TARGET-EFT)[213] | Wrong intervention |
| NCT04409210 (DEMO-CoCo)[214]  | Wrong intervention |
| Swinburn 2005[215]            | Wrong intervention |
| Whitney 2005[216]             | Wrong intervention |
| Abed 2013[217]                | Wrong intervention |
| Zahedi 2021[218]              | Wrong intervention |
| Wycherley 2016[219]           | Wrong outcomes     |
| Kwok 2012[220]                | Wrong outcomes     |
| Anderson 1990[221]            | Wrong outcomes     |
| Azadbakht 2007[222]           | Wrong outcomes     |
| Brügemann 2007[223]           | Wrong outcomes     |
| Cooper 2003[224]              | Wrong outcomes     |
| Elhayany 2009[225]            | Wrong outcomes     |
| Esposito 2009[226]            | Wrong outcomes     |
| Fitó 2014[227]                | Wrong outcomes     |
| Higgins 2001[228]             | Wrong outcomes     |
| Ko 2007[229]                  | Wrong outcomes     |
| Lasa 2014[230]                | Wrong outcomes     |
| Lear 2001[231]                | Wrong outcomes     |
| McHugh 2001[232]              | Wrong outcomes     |
| Mildestvedt 2007[233]         | Wrong outcomes     |
| Murphy 2009[234]              | Wrong outcomes     |
| Nilsson 2001[235]             | Wrong outcomes     |
| Nordmann 2001[236]            | Wrong outcomes     |
| O'Neil 2016[237]              | Wrong outcomes     |
| PREMIER 2003[238]             | Wrong outcomes     |
| Redfern 2008[239]             | Wrong outcomes     |
| Rivellese 1994[240]           | Wrong outcomes     |
| Sarkkinen 1995[241]           | Wrong outcomes     |
| Seppelt 1996[242]             | Wrong outcomes     |
| Shibayama 2007[243]           | Wrong outcomes     |
| Strychar 2009[244]            | Wrong outcomes     |
| Young 2005[245]               | Wrong outcomes     |
| Yu 2004[246]                  | Wrong outcomes     |
| Mildestvedt 2008[247]         | Wrong outcomes     |
| Marburger 1994[41]            | Wrong outcomes     |
| Niebauer 1996[248]            | Wrong outcomes     |
| Nikolaus 1991[249]            | Wrong outcomes     |

|                             |                  |
|-----------------------------|------------------|
| Appel 2001[250]             | Wrong outcomes   |
| Bemelmans 2000[251]         | Wrong outcomes   |
| Brehm 2009[252]             | Wrong outcomes   |
| Brinkworth 2004[253]        | Wrong outcomes   |
| Brinkworth 2004[254]        | Wrong outcomes   |
| Carey 2005[255]             | Wrong outcomes   |
| Ebbeling 2005[256]          | Wrong outcomes   |
| Eguaras 2015[257]           | Wrong outcomes   |
| Elhayany 2010[225]          | Wrong outcomes   |
| Elkoustaf 2017[258]         | Wrong outcomes   |
| Entwistle 2018[259]         | Wrong outcomes   |
| Esposito 2011[260]          | Wrong outcomes   |
| Esposito 2014[261]          | Wrong outcomes   |
| Gepner 2019[262]            | Wrong outcomes   |
| Gould 1995[263]             | Wrong outcomes   |
| Grave 2013[264]             | Wrong outcomes   |
| Guldbrand 2012[265]         | Wrong outcomes   |
| Heyden 1973[266]            | Wrong outcomes   |
| Jennings 2019[267]          | Wrong outcomes   |
| Harsha 1999[268]            | Wrong outcomes   |
| Langford 1985[269]          | Wrong outcomes   |
| Lim 2010[270]               | Wrong outcomes   |
| Maiorino 2016[271]          | Wrong outcomes   |
| Maiorino 2017[272]          | Wrong outcomes   |
| Murie-Fernandez 2011[273]   | Wrong outcomes   |
| O'Neil 2016[237]            | Wrong outcomes   |
| Oshakbayev 2015[274]        | Wrong outcomes   |
| Steinberg 2019[275]         | Wrong outcomes   |
| Tay 2015[276]               | Wrong outcomes   |
| Hu 2015[277]                | Wrong outcomes   |
| Toobert 2010[278]           | Wrong outcomes   |
| Wong 2016[279]              | Wrong outcomes   |
| Yancy 2020[280]             | Wrong outcomes   |
| Chen 2020[281]              | Wrong outcomes   |
| Unda Villafuerte 2020[282]  | Wrong outcomes   |
| Henzel 2020[283]            | Wrong outcomes   |
| Aldana 2007[284]            | Wrong outcomes   |
| Ard 2016[285]               | Wrong outcomes   |
| LA Veterans Study 1969[286] | Wrong population |
| Abbenhardt 2013[287]        | Wrong population |
| Ackermann 2015[288]         | Wrong population |
| Andrews 2011[289]           | Wrong population |
| Aveyard 2016[290]           | Wrong population |

|                        |                  |
|------------------------|------------------|
| beFIT 1997[291]        | Wrong population |
| BeWEL 2014[292]        | Wrong population |
| Bhopal 2014[293]       | Wrong population |
| Burke 2008[294]        | Wrong population |
| Daumit 2013[295]       | Wrong population |
| Davis TAIM 1993[296]   | Wrong population |
| de Vos 2014[297]       | Wrong population |
| de Waard 1993[298]     | Wrong population |
| DO IT 2006[299]        | Wrong population |
| DPP 2002[300]          | Wrong population |
| Dullaart 1992[301]     | Wrong population |
| Finnish DPS 2001[302]  | Wrong population |
| Finnish DPS 2009[303]  | Wrong population |
| Fitzgibbon 2010[304]   | Wrong population |
| Gabriel 2011[305]      | Wrong population |
| Goodwin 2014[306]      | Wrong population |
| Green 2015[307]        | Wrong population |
| Houtsmuller 1979[308]  | Wrong population |
| HPT 1990[309]          | Wrong population |
| Hunt FFIT 2014[310]    | Wrong population |
| Katula 2013[311]       | Wrong population |
| Laake 2015[312]        | Wrong population |
| Lear 2003[313]         | Wrong population |
| Lear 2002[314]         | Wrong population |
| Ley 2004[315]          | Wrong population |
| Logue 2005[316]        | Wrong population |
| Ma 2013[317]           | Wrong population |
| McAuley 2005[318]      | Wrong population |
| Mengham 1999[319]      | Wrong population |
| Messier 2013[320]      | Wrong population |
| Minnesota 1989[321]    | Wrong population |
| Oldroyd 2006[322]      | Wrong population |
| Patrick 2011[323]      | Wrong population |
| Penn 2009[324]         | Wrong population |
| Perri 2014[325]        | Wrong population |
| Rejeski CLIP 2011[326] | Wrong population |
| Rock 2015[327]         | Wrong population |
| Ross 2012[328]         | Wrong population |
| Sacks 2009[329]        | Wrong population |
| Shai 2008[330]         | Wrong population |
| Smith-Warner 2000[331] | Wrong population |
| TOHP I 1992[332]       | Wrong population |
| Uusitupa 1993[333]     | Wrong population |



|                             |                  |
|-----------------------------|------------------|
| Villareal 2011[334]         | Wrong population |
| Wadden 2011[335]            | Wrong population |
| Wing PRIDE 2010[336]        | Wrong population |
| Yardley 2014[337]           | Wrong population |
| Allison 2014[338]           | Wrong population |
| Al Wattar 2018[339]         | Wrong population |
| Chisholm 1992[340]          | Wrong population |
| de Luis 2015[341]           | Wrong population |
| de Luis 2015[342]           | Wrong population |
| Geleijnse 1994[343]         | Wrong population |
| Hebert 1995[344]            | Wrong population |
| Hollis 1995[345]            | Wrong population |
| Jenkins 2017[346]           | Wrong population |
| Mascioli 1990[347]          | Wrong population |
| Ortner Hadžiabdić 2016[348] | Wrong population |
| Primo 2019[349]             | Wrong population |
| Stradling 2017[350]         | Wrong population |
| Stradling 2018[351]         | Wrong population |
| Thomson 2014[352]           | Wrong population |
| Whelton 1997[353]           | Wrong population |
| Calvo-Malvar 2021[354]      | Wrong population |
| Chen 2020[355]              | Wrong population |

Figure S1. Network of named dietary programmes for all-cause mortality at 12 months of follow-up.

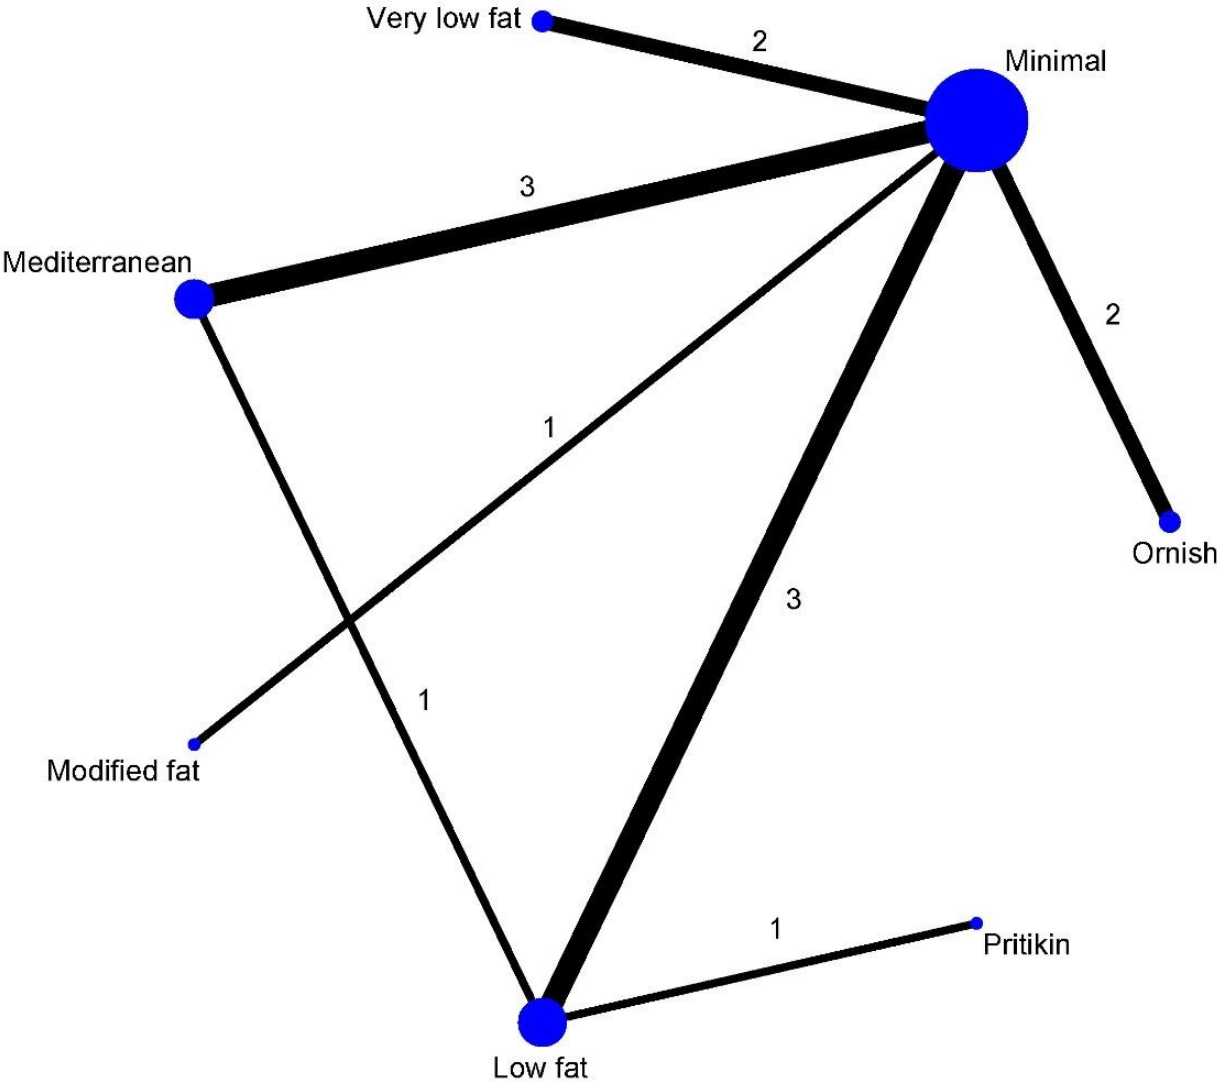

Figure S2. Network of named dietary programmes for all-cause mortality at last follow-up.

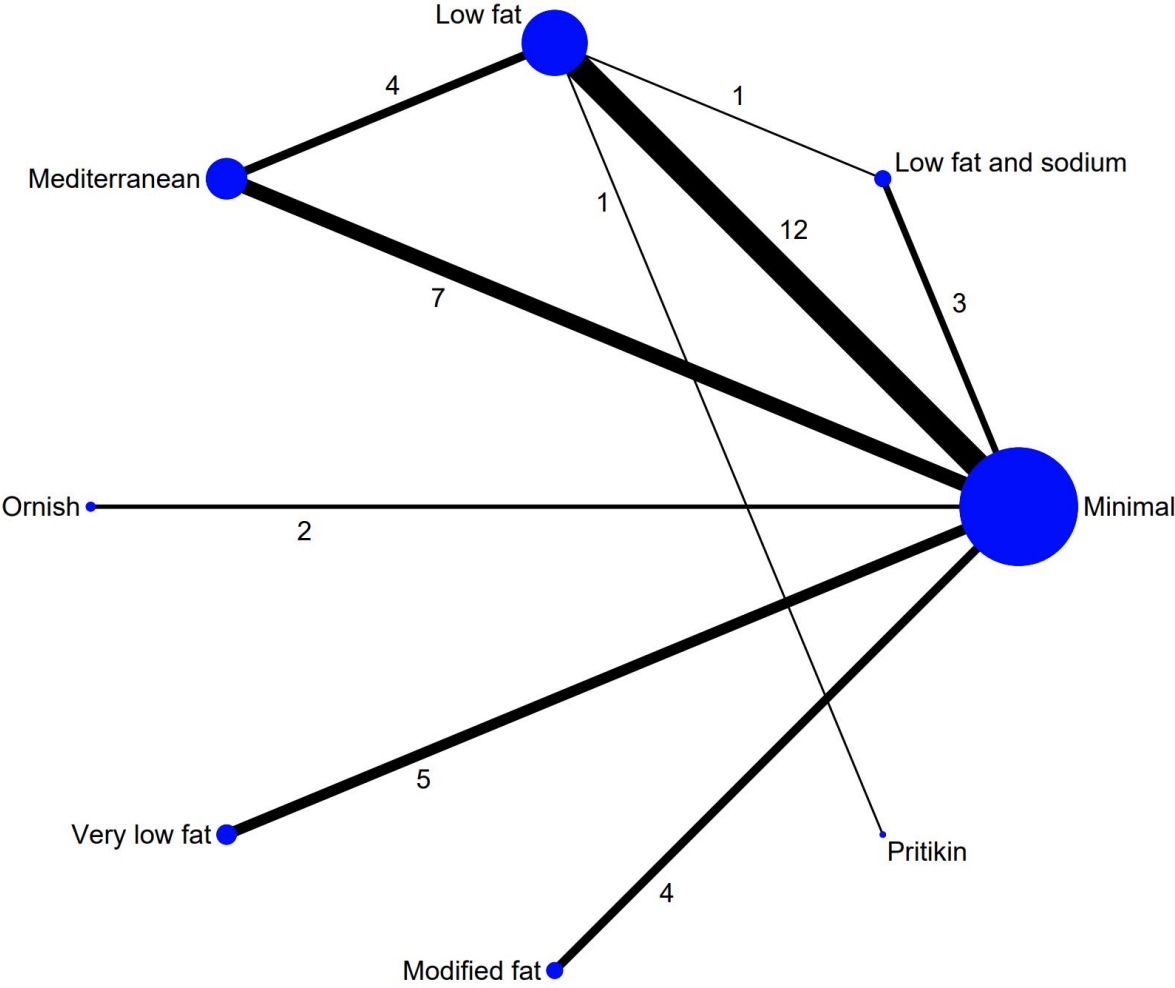

Figure S3. Network of named dietary programmes for cardiovascular mortality at last follow-up.

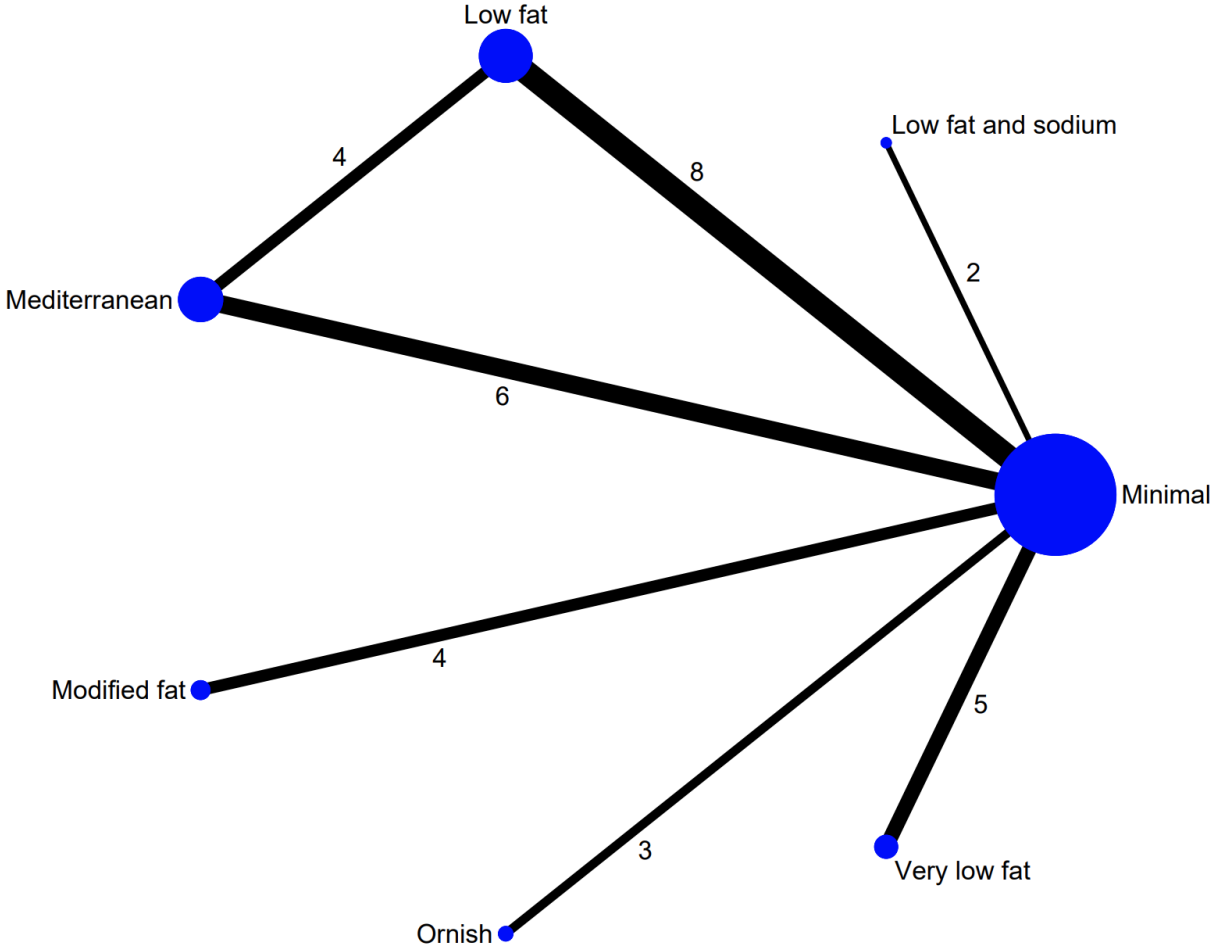

Figure S4. Network of named dietary programmes for stroke at last follow-up.

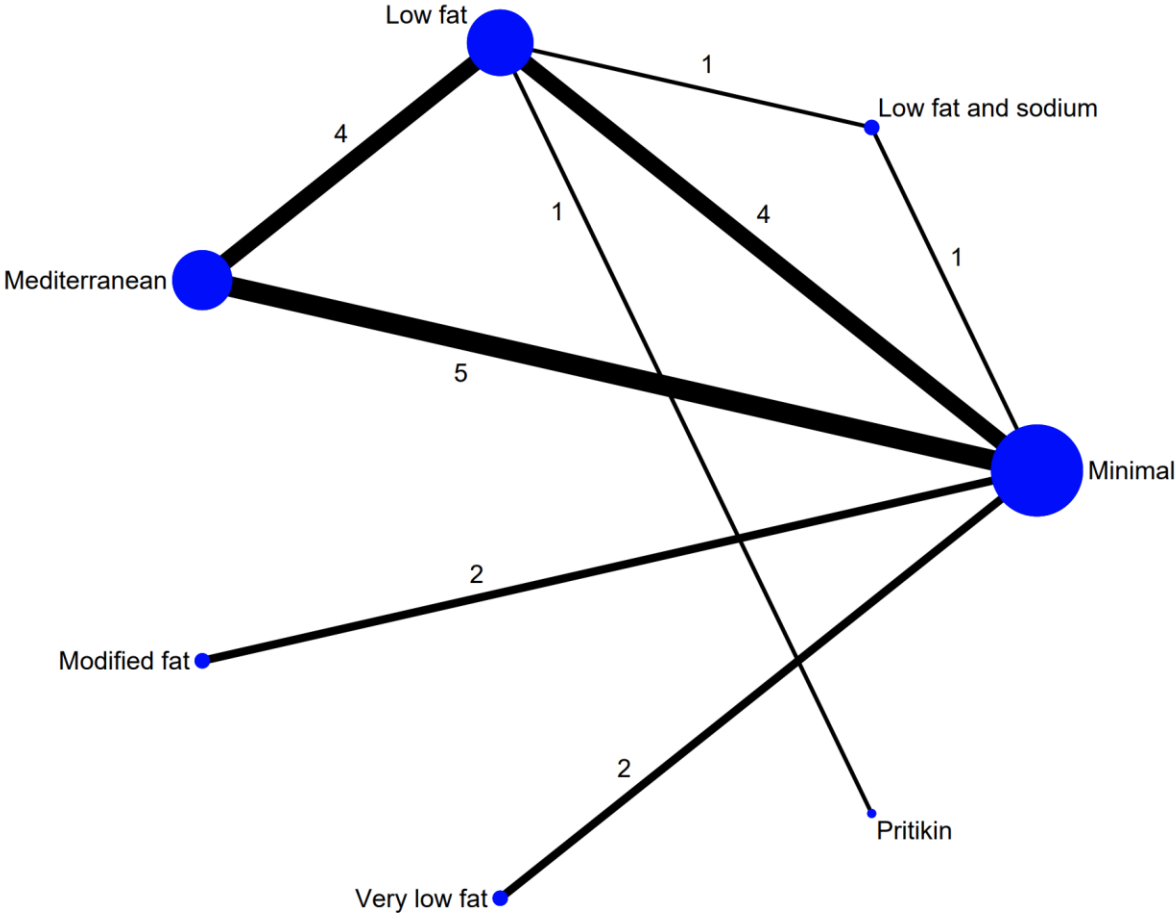

Figure S5. Network of named dietary programmes for non-fatal myocardial infarction at last follow-up.

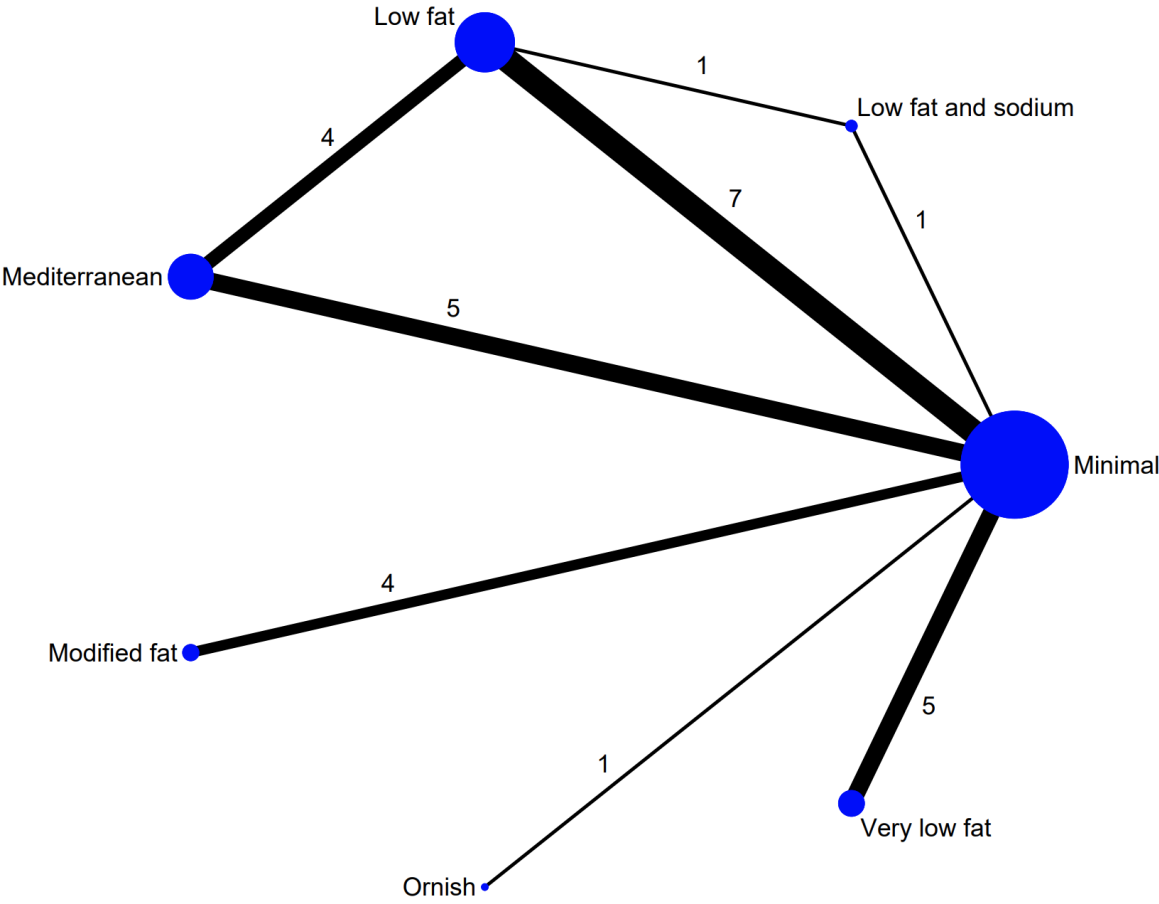

Figure S6. Network of named dietary programmes for unplanned cardiovascular interventions at last follow-up.

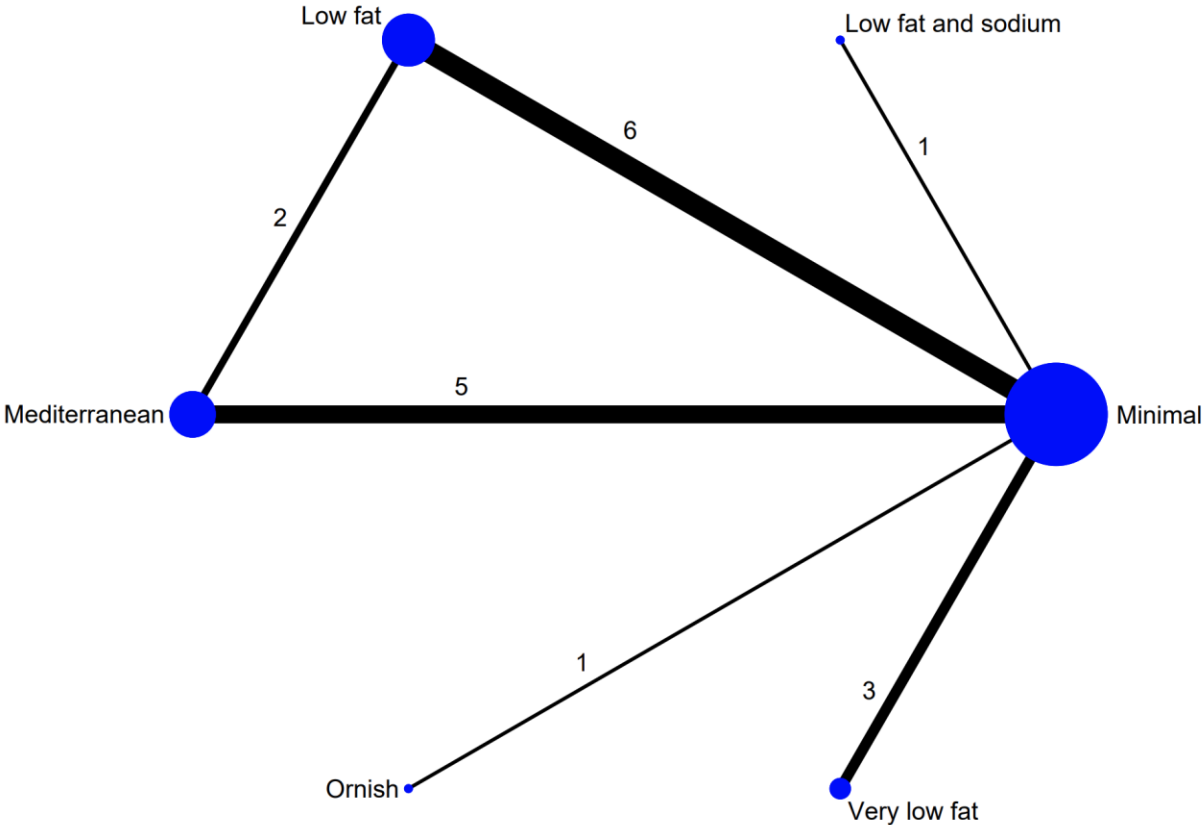

Table S3. Network meta-analysis results comparing the effects of named dietary programmes for all-cause mortality at 12 ( $\pm$ 3) months of follow-up (N = 13 RCTs) including odds ratios (OR) and 95% CIs.

|                       |                        |                       |                      |                      |                       |                       |
|-----------------------|------------------------|-----------------------|----------------------|----------------------|-----------------------|-----------------------|
| <b>Minimal</b>        | 1.89<br>(1.01,3.55)    | 1.02<br>(0.66,1.57)   | 0.41<br>(0.06,2.85)  | 0.14<br>(0.01,2.60)  | 0.41<br>(0.04,4.10)   | 4.01<br>(0.15,106.95) |
| 0.53<br>(0.28,0.99)   | <b>Mediterranean</b>   | 0.54<br>(0.32,0.92)   | 0.22<br>(0.03,1.66)  | 0.07<br>(0.00,1.47)  | 0.22<br>(0.02,2.36)   | 2.12<br>(0.08,57.38)  |
| 0.98<br>(0.64,1.50)   | 1.85<br>(1.09,3.13)    | <b>Low fat</b>        | 0.40<br>(0.06,2.92)  | 0.14<br>(0.01,2.62)  | 0.40<br>(0.04,4.17)   | 3.92<br>(0.15,101.63) |
| 2.44<br>(0.35,16.90)  | 4.61<br>(0.60,35.30)   | 2.49<br>(0.34,18.13)  | <b>Very low fat</b>  | 0.34<br>(0.01,11.36) | 1.00<br>(0.05,20.26)  | 9.78<br>(0.22,442.26) |
| 7.10<br>(0.38,131.06) | 13.42<br>(0.68,264.94) | 7.27<br>(0.38,138.38) | 2.91<br>(0.09,96.52) | <b>Modified fat</b>  | 2.93<br>(0.07,119.72) | 28.5<br>(0.35,2299.4) |
| 2.43<br>(0.24,24.17)  | 4.59<br>(0.42,49.71)   | 2.48<br>(0.24,25.73)  | 1.00<br>(0.05,20.12) | 0.34<br>(0.01,13.99) | <b>Ornish</b>         | 9.74<br>(0.18,535.82) |
| 0.25<br>(0.01,6.64)   | 0.47<br>(0.02,12.73)   | 0.25<br>(0.01,6.60)   | 0.10<br>(0.00,4.62)  | 0.04<br>(0.00,2.83)  | 0.10<br>(0.00,5.64)   | <b>Pritikin</b>       |



Table S4. Network meta-analysis results comparing the effects of named dietary programmes for all-cause mortality at 12 ( $\pm$ 3) months of follow-up (N = 12 RCTs) including odds ratios (OR) and 95% CIs. Sensitivity analysis excluding Singh 2017.

|                       |                       |                       |                      |                      |                       |                       |
|-----------------------|-----------------------|-----------------------|----------------------|----------------------|-----------------------|-----------------------|
| <b>Minimal</b>        | 1.25 (0.36,4.31)      | 1.08 (0.69,1.70)      | 0.41<br>(0.06,2.85)  | 0.14<br>(0.01,2.60)  | 0.41 (0.04,4.10)      | 4.24<br>(0.16,113.44) |
| 0.80 (0.23,2.77)      | <b>Mediterranean</b>  | 0.87 (0.23,3.25)      | 0.33<br>(0.03,3.28)  | 0.11<br>(0.00,2.68)  | 0.33 (0.02,4.50)      | 3.40<br>(0.10,114.06) |
| 0.92 (0.59,1.46)      | 1.15 (0.31,4.32)      | <b>Low fat</b>        | 0.38<br>(0.05,2.77)  | 0.13<br>(0.01,2.49)  | 0.38 (0.04,3.96)      | 3.92<br>(0.15,101.63) |
| 2.44<br>(0.35,16.90)  | 3.04 (0.30,30.31)     | 2.64<br>(0.36,19.27)  | <b>Very low fat</b>  | 0.34<br>(0.01,11.36) | 1.00 (0.05,20.26)     | 10.34<br>(0.23,468.8) |
| 7.10<br>(0.38,131.06) | 8.86<br>(0.37,210.46) | 7.68<br>(0.40,146.82) | 2.91<br>(0.09,96.52) | <b>Modified fat</b>  | 2.93<br>(0.07,119.72) | 30.1<br>(0.37,2436.8) |
| 2.43<br>(0.24,24.17)  | 3.03 (0.22,41.22)     | 2.63<br>(0.25,27.32)  | 1.00<br>(0.05,20.12) | 0.34<br>(0.01,13.99) | <b>Ornish</b>         | 10.30<br>(0.19,567.9) |
| 0.24 (0.01,6.30)      | 0.29 (0.01,9.85)      | 0.25 (0.01,6.60)      | 0.10<br>(0.00,4.39)  | 0.03<br>(0.00,2.68)  | 0.10 (0.00,5.35)      | <b>Pritikin</b>       |

Table S5. Network meta-analysis results comparing the effects of named dietary programmes for all-cause mortality at last follow-up (N = 37 RCTs) including odds ratios (OR) and 95% CIs.

|                      |                      |                      |                      |                      |                                    |                     |                        |
|----------------------|----------------------|----------------------|----------------------|----------------------|------------------------------------|---------------------|------------------------|
| <b>Minimal</b>       | 1.39 (1.08,1.80)     | 1.19<br>(1.05,1.35)  | 1.05<br>(0.85,1.30)  | 0.95<br>(0.72,1.26)  | 0.98<br>(0.79,1.23)                | 0.41<br>(0.04,4.10) | 4.67<br>(0.18,121.42)  |
| 0.72<br>(0.56,0.92)  | <b>Mediterranean</b> | 0.85<br>(0.69,1.06)  | 0.75<br>(0.55,1.02)  | 0.68<br>(0.46,1.01)  | 0.71<br>(0.51,0.98)                | 0.30<br>(0.03,2.98) | 3.35<br>(0.13,87.50)   |
| 0.84<br>(0.74,0.95)  | 1.17 (0.94,1.45)     | <b>Low fat</b>       | 0.88<br>(0.69,1.12)  | 0.80<br>(0.59,1.09)  | 0.83<br>(0.64,1.06)                | 0.35<br>(0.03,3.45) | 3.92<br>(0.15,101.71)  |
| 0.95<br>(0.77,1.18)  | 1.33 (0.98,1.80)     | 1.14<br>(0.89,1.45)  | <b>Very low fat</b>  | 0.91<br>(0.64,1.30)  | 0.94<br>(0.69,1.28)                | 0.39<br>(0.04,3.95) | 4.46<br>(0.17,116.58)  |
| 1.05<br>(0.80,1.38)  | 1.46 (0.99,2.16)     | 1.25<br>(0.92,1.70)  | 1.10<br>(0.77,1.57)  | <b>Modified fat</b>  | 1.03<br>(0.72,1.47)                | 0.43<br>(0.04,4.37) | 4.90<br>(0.19,128.87)  |
| 1.02<br>(0.82,1.27)  | 1.42 (1.02,1.98)     | 1.21<br>(0.95,1.55)  | 1.07<br>(0.78,1.45)  | 0.97<br>(0.68,1.38)  | <b>Combined low fat-low sodium</b> | 0.42<br>(0.04,4.22) | 4.75<br>(0.18,124.40)  |
| 2.43<br>(0.24,24.18) | 3.39<br>(0.34,34.18) | 2.89<br>(0.29,28.89) | 2.55<br>(0.25,25.60) | 2.32<br>(0.23,23.44) | 2.39<br>(0.24,24.02)               | <b>Ornish</b>       | 11.35<br>(0.21,611.31) |
| 0.21<br>(0.01,5.56)  | 0.30 (0.01,7.79)     | 0.25<br>(0.01,6.61)  | 0.22<br>(0.01,5.87)  | 0.20<br>(0.01,5.37)  | 0.21<br>(0.01,5.51)                | 0.09<br>(0.00,4.75) | <b>Pritikin</b>        |

Table S6. Network meta-analysis results comparing the effects of named dietary programmes for all-cause mortality at last follow-up (N = 35 RCTs) including odds ratios (OR) and 95% CIs. Sensitivity analysis excluding Singh 2002 & 2017.

|                   |                      |                   |                     |                     |                                    |                  |                     |
|-------------------|----------------------|-------------------|---------------------|---------------------|------------------------------------|------------------|---------------------|
| <b>Minimal</b>    | 1.25 (1.02,1.53)     | 1.21 (1.08,1.35)  | 1.05 (0.86,1.28)    | 0.96 (0.73,1.25)    | 0.98 (0.79,1.22)                   | 0.41 (0.04,4.10) | 4.73 (0.18,122.90)  |
| 0.80 (0.66,0.98)  | <b>Mediterranean</b> | 0.97 (0.80,1.17)  | 0.84 (0.63,1.11)    | 0.77 (0.55,1.07)    | 0.79 (0.59,1.06)                   | 0.33 (0.03,3.31) | 3.79 (0.15,98.78)   |
| 0.83 (0.74,0.93)  | 1.03 (0.86,1.25)     | <b>Low fat</b>    | 0.87 (0.69,1.09)    | 0.79 (0.59,1.06)    | 0.82 (0.64,1.04)                   | 0.34 (0.03,3.41) | 3.92 (0.15,101.63)  |
| 0.96 (0.78,1.17)  | 1.19 (0.90,1.58)     | 1.15 (0.92,1.45)  | <b>Very low fat</b> | 0.91 (0.65,1.28)    | 0.94 (0.70,1.26)                   | 0.39 (0.04,3.95) | 4.53 (0.17,118.22)  |
| 1.05 (0.80,1.37)  | 1.31 (0.93,1.83)     | 1.26 (0.94,1.69)  | 1.09 (0.78,1.53)    | <b>Modified fat</b> | 1.03 (0.73,1.45)                   | 0.43 (0.04,4.36) | 4.96 (0.19,130.09)  |
| 1.02 (0.82,1.26)  | 1.27 (0.95,1.70)     | 1.23 (0.96,1.56)  | 1.06 (0.79,1.43)    | 0.97 (0.69,1.37)    | <b>Combined low fat-low sodium</b> | 0.42 (0.04,4.21) | 4.81 (0.18,125.75)  |
| 2.43 (0.24,24.17) | 3.03 (0.30,30.43)    | 2.93 (0.29,29.25) | 2.54 (0.25,25.49)   | 2.32 (0.23,23.45)   | 2.39 (0.24,24.02)                  | <b>Ornish</b>    | 11.50 (0.21,618.65) |
| 0.21 (0.01,5.48)  | 0.26 (0.01,6.87)     | 0.25 (0.01,6.60)  | 0.22 (0.01,5.77)    | 0.20 (0.01,5.30)    | 0.21 (0.01,5.43)                   | 0.09 (0.00,4.68) | <b>Pritikin</b>     |

Table S7. Network meta-analysis results comparing the effects of named dietary programmes for all-cause mortality at last follow-up including odds ratios (OR) and 95% CIs. Sensitivity analysis excluding trials with smoking or drug therapy interventions.

|                      |                       |                      |                      |                      |                                        |                     |                         |
|----------------------|-----------------------|----------------------|----------------------|----------------------|----------------------------------------|---------------------|-------------------------|
| <b>Minimal</b>       | 1.57 (1.04,2.38)      | 1.17<br>(0.84,1.63)  | 1.09<br>(0.77,1.56)  | 0.93<br>(0.66,1.31)  | 0.98<br>(0.68,1.43)                    | 0.36<br>(0.01,9.05) | 4.59 (0.17,123.54)      |
| 0.64<br>(0.42,0.96)  | <b>Mediterranean</b>  | 0.74<br>(0.55,1.01)  | 0.70<br>(0.41,1.18)  | 0.59<br>(0.34,1.02)  | 0.63<br>(0.37,1.06)                    | 0.23<br>(0.01,5.91) | 2.92 (0.11,78.35)       |
| 0.85<br>(0.61,1.19)  | 1.34 (0.99,1.81)      | <b>Low fat</b>       | 0.93<br>(0.58,1.51)  | 0.79<br>(0.49,1.28)  | 0.84<br>(0.53,1.33)                    | 0.30<br>(0.01,7.86) | 3.92 (0.15,103.72)      |
| 0.91<br>(0.64,1.31)  | 1.44 (0.85,2.44)      | 1.07<br>(0.66,1.73)  | <b>Very low fat</b>  | 0.85<br>(0.51,1.40)  | 0.90<br>(0.54,1.51)                    | 0.33<br>(0.01,8.44) | 4.20 (0.15,115.00)      |
| 1.08<br>(0.76,1.53)  | 1.70 (0.98,2.94)      | 1.26<br>(0.78,2.05)  | 1.18<br>(0.71,1.95)  | <b>Modified fat</b>  | 1.06<br>(0.64,1.77)                    | 0.39<br>(0.01,9.95) | 4.96 (0.18,135.78)      |
| 1.02<br>(0.70,1.48)  | 1.60 (0.94,2.71)      | 1.19<br>(0.75,1.89)  | 1.11<br>(0.66,1.87)  | 0.94<br>(0.57,1.57)  | <b>Combined low<br/>fat-low sodium</b> | 0.36<br>(0.01,9.41) | 4.67 (0.17,127.61)      |
| 2.80<br>(0.11,71.02) | 4.40<br>(0.17,114.63) | 3.28<br>(0.13,84.61) | 3.07<br>(0.12,79.26) | 2.60<br>(0.10,67.07) | 2.75<br>(0.11,71.35)                   | <b>Ornish</b>       | 12.87<br>(0.13,1298.11) |
| 0.22<br>(0.01,5.85)  | 0.34 (0.01,9.17)      | 0.25<br>(0.01,6.74)  | 0.24<br>(0.01,6.52)  | 0.20<br>(0.01,5.53)  | 0.21<br>(0.01,5.84)                    | 0.08<br>(0.00,7.84) | <b>Pritikin</b>         |

Table S8. Network meta-analysis results comparing the effects of named dietary programmes for cardiovascular mortality (N = 32 RCTs) including odds ratios (OR) and 95% CIs.

|                  |                      |                   |                     |                     |                  |                                    |
|------------------|----------------------|-------------------|---------------------|---------------------|------------------|------------------------------------|
| <b>Minimal</b>   | 1.82 (1.28,2.59)     | 1.25 (0.95,1.65)  | 1.01 (0.67,1.53)    | 0.91 (0.62,1.33)    | 0.68 (0.11,4.04) | 0.95 (0.52,1.71)                   |
| 0.55 (0.39,0.78) | <b>Mediterranean</b> | 0.69 (0.50,0.95)  | 0.56 (0.32,0.96)    | 0.50 (0.29,0.85)    | 0.37 (0.06,2.30) | 0.52 (0.27,1.02)                   |
| 0.80 (0.61,1.05) | 1.45 (1.06,1.99)     | <b>Low fat</b>    | 0.81 (0.49,1.33)    | 0.72 (0.44,1.18)    | 0.54 (0.09,3.29) | 0.76 (0.40,1.42)                   |
| 0.99 (0.65,1.50) | 1.80 (1.04,3.11)     | 1.24 (0.75,2.05)  | <b>Very low fat</b> | 0.90 (0.51,1.57)    | 0.67 (0.11,4.19) | 0.94 (0.45,1.94)                   |
| 1.10 (0.75,1.62) | 2.01 (1.18,3.43)     | 1.38 (0.84,2.26)  | 1.11 (0.64,1.95)    | <b>Modified fat</b> | 0.75 (0.12,4.64) | 1.04 (0.51,2.14)                   |
| 1.48 (0.25,8.81) | 2.68 (0.44,16.57)    | 1.85 (0.30,11.25) | 1.49 (0.24,9.32)    | 1.34 (0.22,8.31)    | <b>Ornish</b>    | 1.40 (0.21,9.16)                   |
| 1.06 (0.59,1.91) | 1.92 (0.98,3.77)     | 1.32 (0.70,2.48)  | 1.07 (0.52,2.20)    | 0.96 (0.47,1.96)    | 0.72 (0.11,4.69) | <b>Combined low fat-low sodium</b> |

Table S9. Network meta-analysis results comparing the effects of named dietary programmes for cardiovascular mortality (N = 30 RCTs) including odds ratios (OR) and 95% CIs. Sensitivity analysis excluding Singh 2002 and 2017.

|                  |                      |                   |                     |                     |                  |                                    |
|------------------|----------------------|-------------------|---------------------|---------------------|------------------|------------------------------------|
| <b>Minimal</b>   | 1.57 (1.03,2.41)     | 1.32 (0.97,1.79)  | 1.01 (0.66,1.55)    | 0.90 (0.61,1.34)    | 0.68 (0.11,4.05) | 0.95 (0.51,1.77)                   |
| 0.63 (0.42,0.97) | <b>Mediterranean</b> | 0.84 (0.54,1.29)  | 0.64 (0.35,1.18)    | 0.57 (0.31,1.04)    | 0.43 (0.07,2.70) | 0.61 (0.29,1.26)                   |
| 0.76 (0.56,1.03) | 1.19 (0.78,1.84)     | <b>Low fat</b>    | 0.76 (0.45,1.31)    | 0.68 (0.40,1.16)    | 0.51 (0.08,3.15) | 0.72 (0.37,1.40)                   |
| 0.99 (0.65,1.53) | 1.56 (0.85,2.88)     | 1.31 (0.76,2.24)  | <b>Very low fat</b> | 0.89 (0.50,1.60)    | 0.67 (0.11,4.23) | 0.95 (0.44,2.02)                   |
| 1.11 (0.75,1.65) | 1.75 (0.96,3.18)     | 1.46 (0.86,2.48)  | 1.12 (0.63,2.00)    | <b>Modified fat</b> | 0.75 (0.12,4.70) | 1.06 (0.50,2.24)                   |
| 1.48 (0.25,8.83) | 2.33 (0.37,14.62)    | 1.95 (0.32,11.95) | 1.49 (0.24,9.37)    | 1.33 (0.21,8.31)    | <b>Ornish</b>    | 1.41 (0.21,9.34)                   |
| 1.05 (0.57,1.94) | 1.65 (0.80,3.43)     | 1.38 (0.72,2.67)  | 1.06 (0.50,2.25)    | 0.94 (0.45,1.99)    | 0.71 (0.11,4.71) | <b>Combined low fat-low sodium</b> |

Table S10. Network meta-analysis results comparing the effects of named dietary programmes for cardiovascular mortality at last follow-up including odds ratios (OR) and 95% CIs. Sensitivity analysis excluding trials with smoking or drug therapy interventions.

|                   |                      |                   |                     |                     |                   |                                    |
|-------------------|----------------------|-------------------|---------------------|---------------------|-------------------|------------------------------------|
| <b>Minimal</b>    | 2.01 (1.13,3.57)     | 1.25 (0.74,2.10)  | 0.99 (0.62,1.57)    | 0.89 (0.59,1.35)    | 1.08 (0.02,56.81) | 0.86 (0.45,1.63)                   |
| 0.50 (0.28,0.88)  | <b>Mediterranean</b> | 0.62 (0.42,0.91)  | 0.49 (0.23,1.04)    | 0.44 (0.21,0.92)    | 0.54 (0.01,29.40) | 0.42 (0.18,1.01)                   |
| 0.80 (0.48,1.35)  | 1.61 (1.10,2.36)     | <b>Low fat</b>    | 0.79 (0.39,1.61)    | 0.72 (0.36,1.43)    | 0.87 (0.02,47.07) | 0.69 (0.30,1.57)                   |
| 1.02 (0.64,1.62)  | 2.04 (0.96,4.34)     | 1.27 (0.62,2.59)  | <b>Very low fat</b> | 0.91 (0.49,1.68)    | 1.10 (0.02,59.26) | 0.87 (0.39,1.93)                   |
| 1.12 (0.74,1.69)  | 2.25 (1.08,4.67)     | 1.40 (0.70,2.78)  | 1.10 (0.60,2.03)    | <b>Modified fat</b> | 1.21 (0.02,64.87) | 0.96 (0.44,2.06)                   |
| 0.92 (0.02,48.60) | 1.86 (0.03,101.96)   | 1.15 (0.02,62.76) | 0.91 (0.02,49.19)   | 0.83 (0.02,44.41)   | <b>Ornish</b>     | 0.79 (0.01,43.81)                  |
| 1.17 (0.61,2.23)  | 2.35 (0.99,5.59)     | 1.46 (0.64,3.35)  | 1.15 (0.52,2.56)    | 1.05 (0.49,2.25)    | 1.26 (0.02,69.99) | <b>Combined low fat-low sodium</b> |

Table S11. Network meta-analysis results comparing the effects of named dietary programmes for stroke (N = 20 RCTs) including odds ratios (OR) and 95% CIs.

|                      |                      |                   |                     |                     |                                    |                   |
|----------------------|----------------------|-------------------|---------------------|---------------------|------------------------------------|-------------------|
| <b>Minimal</b>       | 1.53 (1.07,2.19)     | 1.01 (0.77,1.33)  | 1.03 (0.70,1.54)    | 0.60 (0.20,1.79)    | 1.58 (0.80,3.10)                   | 0.40 (0.02,10.57) |
| 0.65 (0.46,0.93)     | <b>Mediterranean</b> | 0.66 (0.50,0.88)  | 0.67 (0.40,1.15)    | 0.39 (0.13,1.23)    | 1.03 (0.48,2.20)                   | 0.26 (0.01,6.91)  |
| 0.99 (0.75,1.29)     | 1.51 (1.14,2.01)     | <b>Low fat</b>    | 1.02 (0.63,1.65)    | 0.59 (0.19,1.82)    | 1.56 (0.76,3.21)                   | 0.40 (0.02,10.31) |
| 0.97 (0.65,1.44)     | 1.48 (0.87,2.52)     | 0.98 (0.61,1.58)  | <b>Very low fat</b> | 0.58 (0.18,1.85)    | 1.52 (0.70,3.34)                   | 0.39 (0.01,10.47) |
| 1.66 (0.56,4.92)     | 2.54 (0.81,7.98)     | 1.68 (0.55,5.15)  | 1.72 (0.54,5.46)    | <b>Modified fat</b> | 2.62 (0.73,9.41)                   | 0.67 (0.02,20.92) |
| 0.63 (0.32,1.24)     | 0.97 (0.45,2.08)     | 0.64 (0.31,1.32)  | 0.66 (0.30,1.43)    | 0.38 (0.11,1.37)    | <b>Combined low fat-low sodium</b> | 0.26 (0.01,7.17)  |
| 2.48<br>(0.09,64.84) | 3.80 (0.14,99.54)    | 2.51 (0.10,64.99) | 2.56 (0.10,68.72)   | 1.49 (0.05,46.64)   | 3.91 (0.14,109.5)                  | <b>Pritikin</b>   |

Table S12. Network meta-analysis results comparing the effects of named dietary programmes for stroke (N = 19 RCTs) including odds ratios (OR) and 95% CIs. Sensitivity analysis excluding Singh 2002.

|                   |                      |                   |                     |                     |                                    |                   |
|-------------------|----------------------|-------------------|---------------------|---------------------|------------------------------------|-------------------|
| <b>Minimal</b>    | 1.51 (1.05,2.16)     | 1.02 (0.78,1.33)  | 1.03 (0.70,1.54)    | 0.60 (0.20,1.79)    | 1.58 (0.80,3.10)                   | 0.41 (0.02,10.62) |
| 0.66 (0.46,0.96)  | <b>Mediterranean</b> | 0.68 (0.50,0.91)  | 0.69 (0.40,1.18)    | 0.40 (0.13,1.26)    | 1.05 (0.49,2.25)                   | 0.27 (0.01,7.07)  |
| 0.98 (0.75,1.29)  | 1.48 (1.09,2.00)     | <b>Low fat</b>    | 1.02 (0.63,1.64)    | 0.59 (0.19,1.82)    | 1.55 (0.75,3.19)                   | 0.40 (0.02,10.31) |
| 0.97 (0.65,1.44)  | 1.45 (0.85,2.49)     | 0.98 (0.61,1.59)  | <b>Very low fat</b> | 0.58 (0.18,1.85)    | 1.53 (0.70,3.34)                   | 0.39 (0.01,10.51) |
| 1.66 (0.56,4.92)  | 2.50 (0.79,7.85)     | 1.69 (0.55,5.18)  | 1.72 (0.54,5.46)    | <b>Modified fat</b> | 2.62 (0.73,9.41)                   | 0.67 (0.02,21.00) |
| 0.63 (0.32,1.24)  | 0.95 (0.44,2.05)     | 0.64 (0.31,1.33)  | 0.66 (0.30,1.43)    | 0.38 (0.11,1.37)    | <b>Combined low fat-low sodium</b> | 0.26 (0.01,7.20)  |
| 2.47 (0.09,64.59) | 3.71 (0.14,97.46)    | 2.51 (0.10,64.99) | 2.55 (0.10,68.46)   | 1.49 (0.05,46.46)   | 3.89<br>(0.14,109.1)               | <b>Pritikin</b>   |

Table S13. Network meta-analysis results comparing the effects of named dietary programmes for stroke including odds ratios (OR) and 95% CIs. Sensitivity analysis excluding trials with smoking or drug therapy interventions.

|                      |                       |                      |                      |                      |                                    |                      |
|----------------------|-----------------------|----------------------|----------------------|----------------------|------------------------------------|----------------------|
| <b>Minimal</b>       | 3.28 (0.87,12.36)     | 2.15 (0.56,8.19)     | 1.03 (0.70,1.54)     | 0.60 (0.20,1.79)     | 1.63 (0.83,3.21)                   | 0.85<br>(0.03,28.84) |
| 0.30 (0.08,1.15)     | <b>Mediterranean</b>  | 0.65 (0.48,0.89)     | 0.32 (0.08,1.26)     | 0.18 (0.03,1.02)     | 0.50 (0.12,2.09)                   | 0.26<br>(0.01,6.85)  |
| 0.47 (0.12,1.78)     | 1.53 (1.12,2.09)      | <b>Low fat</b>       | 0.48 (0.12,1.95)     | 0.28 (0.05,1.58)     | 0.76 (0.18,3.23)                   | 0.40<br>(0.02,10.31) |
| 0.97 (0.65,1.44)     | 3.17 (0.79,12.66)     | 2.07 (0.51,8.38)     | <b>Very low fat</b>  | 0.58 (0.18,1.85)     | 1.58 (0.72,3.46)                   | 0.83<br>(0.02,28.51) |
| 1.66 (0.56,4.92)     | 5.44 (0.98,30.23)     | 3.56<br>(0.63,19.97) | 1.72 (0.54,5.46)     | <b>Modified fat</b>  | 2.70 (0.75,9.74)                   | 1.42<br>(0.04,56.37) |
| 0.61 (0.31,1.21)     | 2.01 (0.48,8.46)      | 1.32 (0.31,5.59)     | 0.63 (0.29,1.39)     | 0.37 (0.10,1.33)     | <b>Combined low fat-low sodium</b> | 0.52<br>(0.01,18.45) |
| 1.17<br>(0.03,39.47) | 3.84<br>(0.15,100.82) | 2.51<br>(0.10,64.99) | 1.21<br>(0.04,41.76) | 0.71<br>(0.02,28.05) | 1.91 (0.05,67.17)                  | <b>Pritikin</b>      |



Table S14. Network meta-analysis results comparing the effects of named dietary programmes for non-fatal MI (N = 27 RCTs) including odds ratios (OR) and 95% CIs.

|                      |                      |                      |                      |                      |                                    |                      |
|----------------------|----------------------|----------------------|----------------------|----------------------|------------------------------------|----------------------|
| <b>Minimal</b>       | 2.07 (1.53,2.81)     | 1.30<br>(1.04,1.63)  | 0.84<br>(0.61,1.16)  | 1.12<br>(0.75,1.68)  | 0.64<br>(0.37,1.10)                | 1.08<br>(0.02,55.24) |
| 0.48 (0.36,0.65)     | <b>Mediterranean</b> | 0.63<br>(0.49,0.81)  | 0.40<br>(0.27,0.61)  | 0.54<br>(0.32,0.90)  | 0.31<br>(0.17,0.57)                | 0.52<br>(0.01,26.98) |
| 0.77 (0.61,0.96)     | 1.59 (1.24,2.04)     | <b>Low fat</b>       | 0.64<br>(0.45,0.92)  | 0.86<br>(0.54,1.37)  | 0.49<br>(0.27,0.87)                | 0.83<br>(0.02,42.68) |
| 1.19 (0.86,1.65)     | 2.47 (1.64,3.71)     | 1.55<br>(1.08,2.23)  | <b>Very low fat</b>  | 1.34<br>(0.79,2.26)  | 0.76<br>(0.41,1.42)                | 1.29<br>(0.02,66.78) |
| 0.89 (0.60,1.34)     | 1.85 (1.11,3.08)     | 1.16<br>(0.73,1.86)  | 0.75<br>(0.44,1.27)  | <b>Modified fat</b>  | 0.57<br>(0.29,1.12)                | 0.97<br>(0.02,50.38) |
| 1.57 (0.91,2.71)     | 3.25 (1.76,6.00)     | 2.05<br>(1.15,3.65)  | 1.32<br>(0.70,2.46)  | 1.76<br>(0.89,3.47)  | <b>Combined low fat-low sodium</b> | 1.70<br>(0.03,90.06) |
| 0.92<br>(0.02,47.25) | 1.92<br>(0.04,99.02) | 1.20<br>(0.02,61.96) | 0.78<br>(0.01,40.15) | 1.04<br>(0.02,54.00) | 0.59<br>(0.01,31.24)               | <b>Ornish</b>        |

Table S15. Network meta-analysis results comparing the effects of named dietary programmes for non-fatal MI (N = 22 RCTs) including odds ratios (OR) and 95% CIs. Sensitivity analysis excluding Singh 2002, Singh 2017, Lehmann 2011, Shea 2011, and Research Committee 1965.

|                      |                      |                      |                      |                      |                                            |                      |
|----------------------|----------------------|----------------------|----------------------|----------------------|--------------------------------------------|----------------------|
| <b>Minimal</b>       | 1.87 (1.30,2.69)     | 1.37<br>(1.05,1.78)  | 0.82<br>(0.54,1.23)  | 1.12<br>(0.74,1.69)  | 0.60<br>(0.34,1.07)                        | 1.08<br>(0.02,55.36) |
| 0.53 (0.37,0.77)     | <b>Mediterranean</b> | 0.73<br>(0.52,1.02)  | 0.44<br>(0.26,0.72)  | 0.60<br>(0.34,1.04)  | 0.32<br>(0.16,0.64)                        | 0.58<br>(0.01,30.11) |
| 0.73 (0.56,0.96)     | 1.37 (0.98,1.91)     | <b>Low fat</b>       | 0.60<br>(0.39,0.92)  | 0.82<br>(0.50,1.35)  | 0.44<br>(0.23,0.83)                        | 0.79<br>(0.02,40.91) |
| 1.23 (0.81,1.85)     | 2.29 (1.39,3.78)     | 1.67<br>(1.09,2.57)  | <b>Very low fat</b>  | 1.37<br>(0.76,2.48)  | 0.74<br>(0.36,1.50)                        | 1.33<br>(0.03,69.38) |
| 0.90 (0.59,1.35)     | 1.67 (0.96,2.92)     | 1.22<br>(0.74,2.02)  | 0.73<br>(0.40,1.32)  | <b>Modified fat</b>  | 0.54<br>(0.26,1.10)                        | 0.97<br>(0.02,50.64) |
| 1.66 (0.93,2.97)     | 3.11 (1.57,6.17)     | 2.27<br>(1.20,4.31)  | 1.36<br>(0.67,2.77)  | 1.86<br>(0.91,3.79)  | <b>Combined low<br/>fat-low<br/>sodium</b> | 1.80<br>(0.03,96.16) |
| 0.92<br>(0.02,47.36) | 1.73<br>(0.03,90.02) | 1.26<br>(0.02,65.25) | 0.75<br>(0.01,39.45) | 1.03<br>(0.02,54.07) | 0.56<br>(0.01,29.69)                       | <b>Ornish</b>        |

Table S16. Network meta-analysis results comparing the effects of named dietary programmes for non-fatal MI including odds ratios (OR) and 95% CIs. Sensitivity analysis excluding trials with smoking or drug therapy interventions.

|                      |                       |                      |                      |                      |                                    |                      |
|----------------------|-----------------------|----------------------|----------------------|----------------------|------------------------------------|----------------------|
| <b>Minimal</b>       | 2.36 (1.49,3.74)      | 1.45 (0.96,2.19)     | 0.79 (0.56,1.11)     | 1.12 (0.74,1.70)     | 0.64 (0.37,1.14)                   | 1.08<br>(0.02,55.41) |
| 0.42 (0.27,0.67)     | <b>Mediterranean</b>  | 0.61 (0.46,0.83)     | 0.33 (0.19,0.58)     | 0.47 (0.25,0.88)     | 0.27 (0.13,0.55)                   | 0.46<br>(0.01,24.08) |
| 0.69 (0.46,1.04)     | 1.63 (1.21,2.19)      | <b>Low fat</b>       | 0.54 (0.32,0.93)     | 0.77 (0.43,1.38)     | 0.44 (0.22,0.88)                   | 0.74<br>(0.01,38.96) |
| 1.27 (0.90,1.79)     | 3.00 (1.72,5.26)      | 1.85 (1.08,3.16)     | <b>Very low fat</b>  | 1.42 (0.82,2.45)     | 0.82 (0.43,1.58)                   | 1.37<br>(0.03,71.50) |
| 0.90 (0.59,1.36)     | 2.12 (1.13,3.95)      | 1.30 (0.72,2.34)     | 0.70 (0.41,1.22)     | <b>Modified fat</b>  | 0.58 (0.29,1.17)                   | 0.97<br>(0.02,50.74) |
| 1.55 (0.88,2.73)     | 3.66 (1.81,7.43)      | 2.25 (1.14,4.45)     | 1.22 (0.63,2.35)     | 1.73 (0.85,3.51)     | <b>Combined low fat-low sodium</b> | 1.68<br>(0.03,89.48) |
| 0.92<br>(0.02,47.40) | 2.19<br>(0.04,115.03) | 1.34<br>(0.03,70.37) | 0.73<br>(0.01,37.84) | 1.03<br>(0.02,54.10) | 0.60 (0.01,31.83)                  | <b>Ornish</b>        |

Table S17. Network meta-analysis results comparing the effects of named dietary programmes for unplanned cardiovascular interventions (N = 18 RCTs) including odds ratios (OR) and 95% CIs.

|                  |                      |                  |                     |                                    |                  |
|------------------|----------------------|------------------|---------------------|------------------------------------|------------------|
| <b>Minimal</b>   | 1.23 (0.77,1.97)     | 1.58 (0.98,2.54) | 1.05 (0.60,1.84)    | 0.74 (0.32,1.69)                   | 1.09 (0.32,3.73) |
| 0.81 (0.51,1.30) | <b>Mediterranean</b> | 1.28 (0.72,2.29) | 0.86 (0.42,1.76)    | 0.60 (0.23,1.56)                   | 0.89 (0.24,3.30) |
| 0.63 (0.39,1.02) | 0.78 (0.44,1.39)     | <b>Low fat</b>   | 0.67 (0.33,1.34)    | 0.47 (0.18,1.22)                   | 0.69 (0.18,2.58) |
| 0.95 (0.54,1.65) | 1.17 (0.57,2.40)     | 1.50 (0.74,3.02) | <b>Very low fat</b> | 0.70 (0.26,1.90)                   | 1.03 (0.27,3.99) |
| 1.35 (0.59,3.09) | 1.66 (0.64,4.29)     | 2.13 (0.82,5.53) | 1.42 (0.53,3.85)    | <b>Combined low fat-low sodium</b> | 1.47 (0.33,6.47) |
| 0.92 (0.27,3.14) | 1.13 (0.30,4.20)     | 1.45 (0.39,5.41) | 0.97 (0.25,3.72)    | 0.68 (0.15,2.99)                   | <b>Ornish</b>    |

Table S18. Network meta-analysis results comparing the effects of named dietary programmes for unplanned cardiovascular interventions (N = 17 RCTs) including odds ratios (OR) and 95% CIs. Sensitivity analysis excluding Singh 2002.

|                     |                      |                     |                     |                                    |                     |
|---------------------|----------------------|---------------------|---------------------|------------------------------------|---------------------|
| <b>Minimal</b>      | 1.03<br>(0.65,1.64)  | 1.74<br>(1.08,2.82) | 1.04<br>(0.62,1.75) | 0.74<br>(0.35,1.58)                | 1.09<br>(0.33,3.56) |
| 0.97<br>(0.61,1.54) | <b>Mediterranean</b> | 1.69<br>(0.87,3.27) | 1.01<br>(0.50,2.05) | 0.72<br>(0.29,1.75)                | 1.06<br>(0.30,3.77) |
| 0.57<br>(0.35,0.93) | 0.59<br>(0.31,1.15)  | <b>Low fat</b>      | 0.60<br>(0.31,1.17) | 0.43<br>(0.17,1.05)                | 0.63<br>(0.17,2.25) |
| 0.96<br>(0.57,1.61) | 0.99<br>(0.49,2.00)  | 1.67<br>(0.85,3.27) | <b>Very low fat</b> | 0.71<br>(0.28,1.78)                | 1.05<br>(0.29,3.81) |
| 1.35<br>(0.63,2.88) | 1.39<br>(0.57,3.39)  | 2.35<br>(0.96,5.78) | 1.41<br>(0.56,3.53) | <b>Combined low fat-low sodium</b> | 1.47<br>(0.36,6.01) |
| 0.92<br>(0.28,3.00) | 0.95<br>(0.26,3.38)  | 1.60<br>(0.44,5.74) | 0.96<br>(0.26,3.49) | 0.68<br>(0.17,2.78)                | <b>Ornish</b>       |

Table S19. Network meta-analysis results comparing the effects of named dietary programmes for unplanned cardiovascular interventions including odds ratios (OR) and 95% CIs. Sensitivity analysis excluding trials with smoking or drug therapy interventions.

|                  |                      |                   |                     |                                    |                   |
|------------------|----------------------|-------------------|---------------------|------------------------------------|-------------------|
| <b>Minimal</b>   | 1.64 (0.62,4.32)     | 2.16 (0.67,6.91)  | 0.89 (0.32,2.46)    | 0.74 (0.19,2.86)                   | 1.09 (0.21,5.56)  |
| 0.61 (0.23,1.60) | <b>Mediterranean</b> | 1.32 (0.48,3.59)  | 0.54 (0.13,2.19)    | 0.45 (0.09,2.38)                   | 0.66 (0.10,4.41)  |
| 0.46 (0.14,1.48) | 0.76 (0.28,2.08)     | <b>Low fat</b>    | 0.41 (0.09,1.91)    | 0.34 (0.06,2.04)                   | 0.50 (0.07,3.73)  |
| 1.13 (0.41,3.13) | 1.85 (0.46,7.52)     | 2.44 (0.52,11.32) | <b>Very low fat</b> | 0.84 (0.15,4.55)                   | 1.23 (0.18,8.41)  |
| 1.35 (0.35,5.21) | 2.22 (0.42,11.67)    | 2.92 (0.49,17.33) | 1.20 (0.22,6.51)    | <b>Combined low fat-low sodium</b> | 1.47 (0.18,12.21) |
| 0.92 (0.18,4.68) | 1.51 (0.23,10.01)    | 1.98 (0.27,14.66) | 0.81 (0.12,5.56)    | 0.68 (0.08,5.64)                   | <b>Ornish</b>     |

Table S20. Network meta-regression results adjusting for exercise co-interventions for all-cause mortality at last follow-up.

| Comparator                  | Treatment             |                             |                       |                      |                       |                         |                     |                       |
|-----------------------------|-----------------------|-----------------------------|-----------------------|----------------------|-----------------------|-------------------------|---------------------|-----------------------|
|                             | Minimal               | Combined low fat-low sodium | Low fat               | Medit                | Modified fat          | Ornish                  | Pritikin            | Very low fat          |
| Minimal                     |                       | 1.01<br>(0.72,1.41)         | 0.81<br>(0.61,1.07)   | 0.62<br>(0.43,0.91)  | 1.07<br>(0.78,1.47)   | 2.80<br>(0.11,70.46)    | 0.21<br>(0.01,5.46) | 0.95<br>(0.69,1.31)   |
| Combined low fat-low sodium | 0.99<br>(0.71,1.39)   |                             | 0.80<br>(0.53,1.20)   | 0.62<br>(0.38,1.00)  | 1.06<br>(0.67,1.69)   | 2.78<br>(0.11,71.12)    | 0.20<br>(0.01,5.49) | 0.95<br>(0.60,1.50)   |
| Low fat                     | 1.24<br>(0.94,1.64)   | 1.25<br>(0.83,1.88)         |                       | 0.77<br>(0.58,1.01)  | 1.32<br>(0.86,2.03)   | 3.47<br>(0.14,88.33)    | 0.25<br>(0.01,6.69) | 1.18<br>(0.78,1.80)   |
| Medit                       | 1.61<br>(1.10,2.35)   | 1.62<br>(1.00,2.62)         | 1.30<br>(0.99,1.71)   |                      | 1.72<br>(1.03,2.86)   | 4.51<br>(0.18,115.86)   | 0.33<br>(0.01,8.78) | 1.53<br>(0.94,2.49)   |
| Modified fat                | 0.94<br>(0.68,1.29)   | 0.94<br>(0.59,1.50)         | 0.76<br>(0.49,1.16)   | 0.58<br>(0.35,0.97)  |                       | 2.62<br>(0.10,66.98)    | 0.19<br>(0.01,5.19) | 0.89<br>(0.57,1.41)   |
| Ornish                      | 0.36<br>(0.01,8.98)   | 0.36<br>(0.01,9.21)         | 0.29<br>(0.01,7.34)   | 0.22<br>(0.01,5.71)  | 0.38<br>(0.01,9.75)   |                         | 0.07<br>(0.00,7.30) | 0.34<br>(0.01,8.70)   |
| Pritikin                    | 4.86<br>(0.18,128.99) | 4.90<br>(0.18,131.80)       | 3.92<br>(0.15,102.91) | 3.02<br>(0.11,80.18) | 5.19<br>(0.19,140.12) | 13.61<br>(0.14,1352.85) |                     | 4.63<br>(0.17,124.87) |
| Very low fat                | 1.05<br>(0.76,1.44)   | 1.06<br>(0.67,1.68)         | 0.85<br>(0.56,1.29)   | 0.65<br>(0.40,1.06)  | 1.12<br>(0.71,1.77)   | 2.94<br>(0.11,75.07)    | 0.22<br>(0.01,5.82) |                       |

Table S21. Network meta-regression results adjusting for drug therapy co-interventions for all-cause mortality at last follow-up.

| Comparator                  | Treatment             |                             |                       |                      |                       |                        |                     |                       |
|-----------------------------|-----------------------|-----------------------------|-----------------------|----------------------|-----------------------|------------------------|---------------------|-----------------------|
|                             | Minimal               | Combined low fat-low sodium | Low fat               | Medit                | Modified fat          | Ornish                 | Pritikin            | Very low fat          |
| Minimal                     | .                     | 1.00<br>(0.73,1.39)         | 0.78<br>(0.62,0.99)   | 0.64<br>(0.47,0.87)  | 1.07<br>(0.78,1.46)   | 2.43<br>(0.24,24.34)   | 0.20<br>(0.01,5.25) | 0.93<br>(0.69,1.25)   |
| Combined low fat-low sodium | 1.00<br>(0.72,1.38)   |                             | 0.78<br>(0.53,1.14)   | 0.64<br>(0.42,0.97)  | 1.06<br>(0.68,1.67)   | 2.42<br>(0.24,24.81)   | 0.20<br>(0.01,5.30) | 0.93<br>(0.60,1.44)   |
| Low fat                     | 1.28<br>(1.01,1.63)   | 1.29<br>(0.88,1.88)         |                       | 0.82<br>(0.64,1.04)  | 1.37<br>(0.92,2.03)   | 3.11<br>(0.31,31.57)   | 0.25<br>(0.01,6.67) | 1.19<br>(0.82,1.73)   |
| Medit                       | 1.57<br>(1.16,2.13)   | 1.57<br>(1.03,2.41)         | 1.22<br>(0.96,1.56)   |                      | 1.67<br>(1.07,2.61)   | 3.81<br>(0.37,38.92)   | 0.31<br>(0.01,8.23) | 1.46<br>(0.97,2.19)   |
| Modified fat                | 0.94<br>(0.69,1.28)   | 0.94<br>(0.60,1.48)         | 0.73<br>(0.49,1.09)   | 0.60<br>(0.38,0.94)  |                       | 2.28<br>(0.22,23.33)   | 0.19<br>(0.01,5.01) | 0.87<br>(0.56,1.35)   |
| Ornish                      | 0.41<br>(0.04,4.13)   | 0.41<br>(0.04,4.24)         | 0.32<br>(0.03,3.26)   | 0.26<br>(0.03,2.69)  | 0.44<br>(0.04,4.49)   |                        | 0.08<br>(0.00,4.49) | 0.38<br>(0.04,3.91)   |
| Pritikin                    | 5.03<br>(0.19,132.71) | 5.04<br>(0.19,134.92)       | 3.92<br>(0.15,102.67) | 3.21<br>(0.12,84.68) | 5.36<br>(0.20,143.60) | 12.21<br>(0.22,668.75) |                     | 4.68<br>(0.17,124.97) |
| Very low fat                | 1.08<br>(0.80,1.45)   | 1.08<br>(0.70,1.67)         | 0.84<br>(0.58,1.22)   | 0.69<br>(0.46,1.03)  | 1.15<br>(0.74,1.77)   | 2.61<br>(0.26,26.68)   | 0.21<br>(0.01,5.72) |                       |

Table S22. Network meta-regression results adjusting for smoking cessation co-interventions for all-cause mortality at last follow-up.

| Comparator                  | Treatment             |                             |                       |                      |                       |                         |                     |                       |
|-----------------------------|-----------------------|-----------------------------|-----------------------|----------------------|-----------------------|-------------------------|---------------------|-----------------------|
|                             | Minimal               | Combined low fat-low sodium | Low fat               | Medit                | Modified fat          | Ornish                  | Pritikin            | Very low fat          |
| Minimal                     | .                     | 1.02<br>(0.73,1.42)         | 0.86<br>(0.68,1.08)   | 0.65<br>(0.47,0.92)  | 1.07<br>(0.78,1.47)   | 2.80<br>(0.11,70.45)    | 0.22<br>(0.01,5.78) | 0.93<br>(0.68,1.26)   |
| Combined low fat-low sodium | 0.98<br>(0.70,1.37)   |                             | 0.84<br>(0.57,1.24)   | 0.64<br>(0.40,1.02)  | 1.05<br>(0.66,1.67)   | 2.75<br>(0.11,70.43)    | 0.21<br>(0.01,5.77) | 0.91<br>(0.58,1.44)   |
| Low fat                     | 1.17<br>(0.93,1.47)   | 1.19<br>(0.81,1.74)         |                       | 0.76<br>(0.58,1.01)  | 1.25<br>(0.84,1.85)   | 3.26<br>(0.13,82.77)    | 0.25<br>(0.01,6.69) | 1.08<br>(0.73,1.58)   |
| Medit                       | 1.53<br>(1.08,2.15)   | 1.55<br>(0.98,2.47)         | 1.31<br>(0.99,1.73)   |                      | 1.63<br>(1.01,2.63)   | 4.28<br>(0.17,109.55)   | 0.33<br>(0.01,8.86) | 1.41<br>(0.90,2.21)   |
| Modified fat                | 0.94<br>(0.68,1.29)   | 0.95<br>(0.60,1.51)         | 0.80<br>(0.54,1.19)   | 0.61<br>(0.38,0.99)  |                       | 2.62<br>(0.10,66.98)    | 0.20<br>(0.01,5.50) | 0.87<br>(0.55,1.36)   |
| Ornish                      | 0.36<br>(0.01,8.98)   | 0.36<br>(0.01,9.30)         | 0.31<br>(0.01,7.77)   | 0.23<br>(0.01,5.99)  | 0.38<br>(0.01,9.75)   |                         | 0.08<br>(0.00,7.74) | 0.33<br>(0.01,8.44)   |
| Pritikin                    | 4.57<br>(0.17,120.89) | 4.65<br>(0.17,124.84)       | 3.92<br>(0.15,102.90) | 2.99<br>(0.11,79.45) | 4.89<br>(0.18,131.24) | 12.81<br>(0.13,1269.22) |                     | 4.23<br>(0.16,113.56) |
| Very low fat                | 1.08<br>(0.79,1.48)   | 1.10<br>(0.70,1.74)         | 0.93<br>(0.63,1.36)   | 0.71<br>(0.45,1.11)  | 1.15<br>(0.74,1.81)   | 3.03<br>(0.12,77.25)    | 0.24<br>(0.01,6.34) |                       |



Table S23. Network meta-regression results adjusting for psychosocial support co-interventions for all-cause mortality at last follow-up.

| Comparator                  | Treatment             |                             |                       |                      |                       |                        |                     |                       |
|-----------------------------|-----------------------|-----------------------------|-----------------------|----------------------|-----------------------|------------------------|---------------------|-----------------------|
|                             | Minimal               | Combined low fat-low sodium | Low fat               | Medit                | Modified fat          | Ornish                 | Pritikin            | Very low fat          |
| Minimal                     |                       | 1.02<br>(0.78,1.31)         | 0.82<br>(0.69,0.99)   | 0.68<br>(0.51,0.90)  | 1.06<br>(0.78,1.44)   | 2.43<br>(0.24,24.30)   | 0.21<br>(0.01,5.51) | 0.96<br>(0.72,1.27)   |
| Combined low fat-low sodium | 0.98<br>(0.76,1.28)   |                             | 0.81<br>(0.60,1.10)   | 0.67<br>(0.46,0.97)  | 1.05<br>(0.70,1.56)   | 2.39<br>(0.24,24.29)   | 0.21<br>(0.01,5.48) | 0.95<br>(0.65,1.39)   |
| Low fat                     | 1.21<br>(1.01,1.46)   | 1.23<br>(0.91,1.67)         |                       | 0.82<br>(0.65,1.04)  | 1.29<br>(0.90,1.84)   | 2.95<br>(0.29,29.71)   | 0.25<br>(0.01,6.66) | 1.17<br>(0.84,1.63)   |
| Medit                       | 1.48<br>(1.11,1.97)   | 1.50<br>(1.03,2.19)         | 1.22<br>(0.96,1.55)   |                      | 1.57<br>(1.02,2.41)   | 3.59<br>(0.35,36.59)   | 0.31<br>(0.01,8.18) | 1.42<br>(0.96,2.11)   |
| Modified fat                | 0.94<br>(0.69,1.28)   | 0.96<br>(0.64,1.43)         | 0.78<br>(0.54,1.11)   | 0.64<br>(0.42,0.98)  |                       | 2.29<br>(0.22,23.34)   | 0.20<br>(0.01,5.27) | 0.90<br>(0.60,1.37)   |
| Ornish                      | 0.41<br>(0.04,4.12)   | 0.42<br>(0.04,4.25)         | 0.34<br>(0.03,3.42)   | 0.28<br>(0.03,2.84)  | 0.44<br>(0.04,4.47)   |                        | 0.09<br>(0.00,4.71) | 0.40<br>(0.04,4.03)   |
| Pritikin                    | 4.76<br>(0.18,125.00) | 4.83<br>(0.18,128.07)       | 3.92<br>(0.15,102.46) | 3.22<br>(0.12,84.81) | 5.06<br>(0.19,134.71) | 11.56<br>(0.21,630.03) |                     | 4.57<br>(0.17,121.53) |
| Very low fat                | 1.04<br>(0.78,1.38)   | 1.06<br>(0.72,1.55)         | 0.86<br>(0.61,1.20)   | 0.70<br>(0.47,1.04)  | 1.11<br>(0.73,1.68)   | 2.53<br>(0.25,25.74)   | 0.22<br>(0.01,5.81) |                       |

Table S24. Network meta-regression results adjusting for exercise co-interventions for cardiovascular mortality at last follow-up.

| Comparator                  | Treatment            |                             |                      |                      |                      |                       |                      |
|-----------------------------|----------------------|-----------------------------|----------------------|----------------------|----------------------|-----------------------|----------------------|
|                             | Minimal              | Combined low fat-low sodium | Low fat              | Medit                | Modified fat         | Ornish                | Very low fat         |
| Minimal                     |                      | 1.17<br>(0.60,2.28)         | 0.72<br>(0.45,1.16)  | 0.46<br>(0.27,0.78)  | 1.12<br>(0.74,1.71)  | 0.92<br>(0.02,48.77)  | 0.94<br>(0.58,1.55)  |
| Combined low fat-low sodium | 0.86<br>(0.44,1.67)  |                             | 0.62<br>(0.27,1.40)  | 0.39<br>(0.17,0.92)  | 0.96<br>(0.44,2.11)  | 0.79<br>(0.01,44.12)  | 0.81<br>(0.35,1.85)  |
| Low fat                     | 1.38<br>(0.86,2.21)  | 1.62<br>(0.71,3.66)         |                      | 0.63<br>(0.43,0.93)  | 1.55<br>(0.81,2.96)  | 1.28<br>(0.02,69.29)  | 1.30<br>(0.66,2.57)  |
| Medit                       | 2.19<br>(1.28,3.76)  | 2.56<br>(1.08,6.05)         | 1.58<br>(1.08,2.33)  |                      | 2.46<br>(1.22,4.95)  | 2.03<br>(0.04,110.83) | 2.07<br>(1.00,4.29)  |
| Modified fat                | 0.89<br>(0.59,1.35)  | 1.04<br>(0.47,2.29)         | 0.64<br>(0.34,1.23)  | 0.41<br>(0.20,0.82)  |                      | 0.82<br>(0.02,44.40)  | 0.84<br>(0.44,1.61)  |
| Ornish                      | 1.08<br>(0.02,57.01) | 1.26<br>(0.02,70.48)        | 0.78<br>(0.01,42.41) | 0.49<br>(0.01,27.00) | 1.21<br>(0.02,65.45) |                       | 1.02<br>(0.02,55.46) |
| Very low fat                | 1.06<br>(0.65,1.74)  | 1.24<br>(0.54,2.85)         | 0.77<br>(0.39,1.51)  | 0.48<br>(0.23,1.00)  | 1.19<br>(0.62,2.28)  | 0.98<br>(0.02,53.31)  |                      |

Table S25. Network meta-regression results adjusting for drug therapy co-interventions for cardiovascular mortality at last follow-up.

| Comparator                  | Treatment           |                             |                     |                     |                     |                      |                     |
|-----------------------------|---------------------|-----------------------------|---------------------|---------------------|---------------------|----------------------|---------------------|
|                             | Minimal             | Combined low fat-low sodium | Low fat             | Medit               | Modified fat        | Ornish               | Very low fat        |
| Minimal                     |                     | 1.17<br>(0.61,2.26)         | 0.66<br>(0.44,0.98) | 0.47<br>(0.30,0.72) | 1.12<br>(0.74,1.69) | 1.48<br>(0.25,8.88)  | 1.02<br>(0.63,1.63) |
| Combined low fat-low sodium | 0.86<br>(0.44,1.65) |                             | 0.56<br>(0.26,1.21) | 0.40<br>(0.18,0.88) | 0.96<br>(0.44,2.08) | 1.26<br>(0.19,8.54)  | 0.87<br>(0.39,1.95) |
| Low fat                     | 1.52<br>(1.02,2.28) | 1.78<br>(0.82,3.85)         |                     | 0.71<br>(0.50,1.02) | 1.71<br>(0.94,3.10) | 2.25<br>(0.36,14.14) | 1.55<br>(0.82,2.92) |
| Medit                       | 2.14<br>(1.39,3.30) | 2.50<br>(1.14,5.50)         | 1.41<br>(0.98,2.02) |                     | 2.40<br>(1.30,4.43) | 3.16<br>(0.50,20.02) | 2.18<br>(1.14,4.17) |
| Modified fat                | 0.89<br>(0.59,1.35) | 1.04<br>(0.48,2.27)         | 0.59<br>(0.32,1.07) | 0.42<br>(0.23,0.77) |                     | 1.32<br>(0.21,8.31)  | 0.91<br>(0.49,1.69) |
| Ornish                      | 0.68<br>(0.11,4.07) | 0.79<br>(0.12,5.35)         | 0.44<br>(0.07,2.80) | 0.32<br>(0.05,2.00) | 0.76<br>(0.12,4.78) |                      | 0.69<br>(0.11,4.40) |
| Very low fat                | 0.98<br>(0.61,1.58) | 1.15<br>(0.51,2.58)         | 0.65<br>(0.34,1.22) | 0.46<br>(0.24,0.88) | 1.10<br>(0.59,2.05) | 1.45<br>(0.23,9.28)  |                     |

Table S26. Network meta-regression results adjusting for smoking cessation co-interventions for cardiovascular mortality at last follow-up.

| Comparator                  | Treatment            |                             |                      |                      |                      |                      |                      |
|-----------------------------|----------------------|-----------------------------|----------------------|----------------------|----------------------|----------------------|----------------------|
|                             | Minimal              | Combined low fat-low sodium | Low fat              | Medit                | Modified fat         | Ornish               | Very low fat         |
| Minimal                     |                      | 1.17<br>(0.61,2.25)         | 0.84<br>(0.56,1.25)  | 0.52<br>(0.31,0.85)  | 1.12<br>(0.74,1.69)  | 0.92<br>(0.02,48.66) | 1.02<br>(0.64,1.62)  |
| Combined low fat-low sodium | 0.86<br>(0.44,1.65)  |                             | 0.72<br>(0.33,1.55)  | 0.44<br>(0.19,1.01)  | 0.96<br>(0.44,2.08)  | 0.79<br>(0.01,43.92) | 0.87<br>(0.39,1.95)  |
| Low fat                     | 1.19<br>(0.80,1.78)  | 1.39<br>(0.65,3.00)         |                      | 0.61<br>(0.42,0.90)  | 1.33<br>(0.74,2.40)  | 1.10<br>(0.02,59.17) | 1.21<br>(0.65,2.26)  |
| Medit                       | 1.94<br>(1.18,3.20)  | 2.27<br>(0.99,5.17)         | 1.63<br>(1.11,2.38)  |                      | 2.17<br>(1.12,4.20)  | 1.79<br>(0.03,97.43) | 1.97<br>(0.99,3.94)  |
| Modified fat                | 0.89<br>(0.59,1.35)  | 1.04<br>(0.48,2.26)         | 0.75<br>(0.42,1.35)  | 0.46<br>(0.24,0.89)  |                      | 0.83<br>(0.02,44.39) | 0.91<br>(0.49,1.69)  |
| Ornish                      | 1.08<br>(0.02,56.88) | 1.26<br>(0.02,70.17)        | 0.91<br>(0.02,48.70) | 0.56<br>(0.01,30.25) | 1.21<br>(0.02,65.06) |                      | 1.10<br>(0.02,59.43) |
| Very low fat                | 0.98<br>(0.62,1.57)  | 1.15<br>(0.51,2.57)         | 0.83<br>(0.44,1.54)  | 0.51<br>(0.25,1.01)  | 1.10<br>(0.59,2.05)  | 0.91<br>(0.02,49.22) |                      |

Table S27. Network meta-regression results adjusting for psychosocial support co-interventions for cardiovascular mortality at last follow-up.

| Comparator                  | Treatment           |                             |                     |                     |                     |                      |                     |
|-----------------------------|---------------------|-----------------------------|---------------------|---------------------|---------------------|----------------------|---------------------|
|                             | Minimal             | Combined low fat-low sodium | Low fat             | Medit               | Modified fat        | Ornish               | Very low fat        |
| Minimal                     | .                   | 1.03<br>(0.53,2.00)         | 0.75<br>(0.54,1.05) | 0.50<br>(0.32,0.78) | 1.12<br>(0.74,1.71) | 1.48<br>(0.25,8.89)  | 0.93<br>(0.57,1.49) |
| Combined low fat-low sodium | 0.97<br>(0.50,1.88) |                             | 0.73<br>(0.36,1.51) | 0.48<br>(0.22,1.06) | 1.09<br>(0.49,2.41) | 1.43<br>(0.21,9.70)  | 0.90<br>(0.40,2.02) |
| Low fat                     | 1.32<br>(0.95,1.85) | 1.37<br>(0.66,2.81)         |                     | 0.66<br>(0.46,0.96) | 1.49<br>(0.86,2.58) | 1.96<br>(0.32,12.14) | 1.23<br>(0.69,2.18) |
| Medit                       | 2.00<br>(1.29,3.11) | 2.06<br>(0.94,4.51)         | 1.51<br>(1.04,2.19) |                     | 2.24<br>(1.21,4.17) | 2.95<br>(0.46,18.75) | 1.85<br>(0.97,3.53) |
| Modified fat                | 0.89<br>(0.59,1.35) | 0.92<br>(0.41,2.04)         | 0.67<br>(0.39,1.17) | 0.45<br>(0.24,0.83) |                     | 1.32<br>(0.21,8.31)  | 0.83<br>(0.44,1.56) |
| Ornish                      | 0.68<br>(0.11,4.08) | 0.70<br>(0.10,4.74)         | 0.51<br>(0.08,3.17) | 0.34<br>(0.05,2.15) | 0.76<br>(0.12,4.80) |                      | 0.63<br>(0.10,4.02) |
| Very low fat                | 1.08<br>(0.67,1.74) | 1.11<br>(0.49,2.51)         | 0.82<br>(0.46,1.45) | 0.54<br>(0.28,1.03) | 1.21<br>(0.64,2.30) | 1.59<br>(0.25,10.22) |                     |

Table S28. Network meta-regression results adjusting for exercise co-interventions for stroke at last follow-up.

| Comparator                  | Treatment            |                             |                      |                     |                      |                       |                      |
|-----------------------------|----------------------|-----------------------------|----------------------|---------------------|----------------------|-----------------------|----------------------|
|                             | Minimal              | Combined low fat-low sodium | Low fat              | Medit               | Modified fat         | Pritikin              | Very low fat         |
| Minimal                     |                      | 0.64<br>(0.28,1.43)         | 0.69<br>(0.25,1.87)  | 0.42<br>(0.15,1.22) | 1.69<br>(0.53,5.37)  | 1.73<br>(0.06,53.52)  | 0.97<br>(0.54,1.73)  |
| Combined low fat-low sodium | 1.57<br>(0.70,3.52)  |                             | 1.08<br>(0.31,3.73)  | 0.67<br>(0.18,2.47) | 2.65<br>(0.65,10.77) | 2.72<br>(0.08,90.78)  | 1.52<br>(0.56,4.11)  |
| Low fat                     | 1.45<br>(0.53,3.95)  | 0.92<br>(0.27,3.19)         |                      | 0.62<br>(0.37,1.03) | 2.45<br>(0.53,11.32) | 2.51<br>(0.09,66.96)  | 1.40<br>(0.44,4.47)  |
| Medit                       | 2.36<br>(0.82,6.77)  | 1.50<br>(0.41,5.56)         | 1.62<br>(0.97,2.72)  |                     | 3.98<br>(0.82,19.37) | 4.08<br>(0.15,113.22) | 2.28<br>(0.68,7.62)  |
| Modified fat                | 0.59<br>(0.19,1.89)  | 0.38<br>(0.09,1.53)         | 0.41<br>(0.09,1.89)  | 0.25<br>(0.05,1.22) |                      | 1.03<br>(0.03,38.40)  | 0.57<br>(0.16,2.10)  |
| Pritikin                    | 0.58<br>(0.02,17.91) | 0.37<br>(0.01,12.30)        | 0.40<br>(0.01,10.63) | 0.25<br>(0.01,6.81) | 0.98<br>(0.03,36.52) |                       | 0.56<br>(0.02,18.20) |
| Very low fat                | 1.03<br>(0.58,1.85)  | 0.66<br>(0.24,1.78)         | 0.71<br>(0.22,2.27)  | 0.44<br>(0.13,1.46) | 1.74<br>(0.48,6.38)  | 1.79<br>(0.05,58.12)  |                      |

Table S29. Network meta-regression results adjusting for drug therapy co-interventions for stroke at last follow-up.

| Comparator                  | Treatment            |                             |                      |                     |                      |                       |                      |
|-----------------------------|----------------------|-----------------------------|----------------------|---------------------|----------------------|-----------------------|----------------------|
|                             | Minimal              | Combined low fat-low sodium | Low fat              | Medit               | Modified fat         | Pritikin              | Very low fat         |
| Minimal                     |                      | 0.64<br>(0.31,1.32)         | 0.88<br>(0.45,1.74)  | 0.57<br>(0.29,1.13) | 1.67<br>(0.55,5.08)  | 2.21<br>(0.08,62.05)  | 0.97<br>(0.61,1.54)  |
| Combined low fat-low sodium | 1.57<br>(0.76,3.28)  |                             | 1.39<br>(0.52,3.71)  | 0.90<br>(0.32,2.51) | 2.62<br>(0.70,9.84)  | 3.48<br>(0.12,105.25) | 1.52<br>(0.64,3.62)  |
| Low fat                     | 1.13<br>(0.58,2.23)  | 0.72<br>(0.27,1.93)         |                      | 0.65<br>(0.42,0.99) | 1.89<br>(0.51,6.99)  | 2.51<br>(0.10,65.62)  | 1.10<br>(0.48,2.50)  |
| Medit                       | 1.75<br>(0.88,3.45)  | 1.11<br>(0.40,3.09)         | 1.54<br>(1.01,2.35)  |                     | 2.91<br>(0.77,10.99) | 3.87<br>(0.14,103.95) | 1.69<br>(0.74,3.86)  |
| Modified fat                | 0.60<br>(0.20,1.83)  | 0.38<br>(0.10,1.43)         | 0.53<br>(0.14,1.96)  | 0.34<br>(0.09,1.29) |                      | 1.33<br>(0.04,44.69)  | 0.58<br>(0.17,1.94)  |
| Pritikin                    | 0.45<br>(0.02,12.66) | 0.29<br>(0.01,8.68)         | 0.40<br>(0.02,10.41) | 0.26<br>(0.01,6.94) | 0.75<br>(0.02,25.34) |                       | 0.44<br>(0.02,12.64) |
| Very low fat                | 1.03<br>(0.65,1.65)  | 0.66<br>(0.28,1.57)         | 0.91<br>(0.40,2.08)  | 0.59<br>(0.26,1.35) | 1.72<br>(0.52,5.77)  | 2.29<br>(0.08,66.31)  |                      |

Table S30. Network meta-regression results adjusting for smoking cessation co-interventions for stroke at last follow-up.

| Comparator                  | Treatment            |                             |                      |                     |                      |                       |                      |
|-----------------------------|----------------------|-----------------------------|----------------------|---------------------|----------------------|-----------------------|----------------------|
|                             | Minimal              | Combined low fat-low sodium | Low fat              | Medit               | Modified fat         | Pritikin              | Very low fat         |
| Minimal                     |                      | 0.63<br>(0.32,1.25)         | 1.02<br>(0.76,1.38)  | 0.65<br>(0.43,0.99) | 1.66<br>(0.56,4.92)  | 2.57<br>(0.10,67.41)  | 0.97<br>(0.65,1.44)  |
| Combined low fat-low sodium | 1.58<br>(0.80,3.09)  |                             | 1.61<br>(0.77,3.36)  | 1.02<br>(0.46,2.26) | 2.61<br>(0.73,9.39)  | 4.04<br>(0.14,113.63) | 1.52<br>(0.70,3.33)  |
| Low fat                     | 0.98<br>(0.72,1.32)  | 0.62<br>(0.30,1.29)         |                      | 0.64<br>(0.47,0.87) | 1.62<br>(0.52,5.01)  | 2.51<br>(0.10,64.99)  | 0.95<br>(0.57,1.56)  |
| Medit                       | 1.54<br>(1.01,2.35)  | 0.98<br>(0.44,2.15)         | 1.57<br>(1.16,2.14)  |                     | 2.55<br>(0.79,8.19)  | 3.95<br>(0.15,103.70) | 1.49<br>(0.83,2.66)  |
| Modified fat                | 0.60<br>(0.20,1.79)  | 0.38<br>(0.11,1.38)         | 0.62<br>(0.20,1.91)  | 0.39<br>(0.12,1.26) |                      | 1.55<br>(0.05,48.48)  | 0.58<br>(0.18,1.85)  |
| Pritikin                    | 0.39<br>(0.01,10.23) | 0.25<br>(0.01,6.95)         | 0.40<br>(0.02,10.31) | 0.25<br>(0.01,6.66) | 0.65<br>(0.02,20.23) |                       | 0.38<br>(0.01,10.13) |
| Very low fat                | 1.03<br>(0.70,1.54)  | 0.66<br>(0.30,1.44)         | 1.06<br>(0.64,1.74)  | 0.67<br>(0.38,1.20) | 1.72<br>(0.54,5.46)  | 2.66<br>(0.10,71.44)  |                      |



Table S31. Network meta-regression results adjusting for psychosocial support co-interventions for stroke at last follow-up.

| Comparator                  | Treatment            |                             |                      |                     |                      |                       |                      |
|-----------------------------|----------------------|-----------------------------|----------------------|---------------------|----------------------|-----------------------|----------------------|
|                             | Minimal              | Combined low fat-low sodium | Low fat              | Medit               | Modified fat         | Pritikin              | Very low fat         |
| Minimal                     | .                    | 0.61<br>(0.31,1.20)         | 0.42<br>(0.19,0.93)  | 0.27<br>(0.12,0.62) | 1.66<br>(0.56,4.92)  | 1.04<br>(0.04,29.78)  | 0.97<br>(0.65,1.44)  |
| Combined low fat-low sodium | 1.64<br>(0.83,3.22)  |                             | 0.68<br>(0.25,1.89)  | 0.44<br>(0.15,1.25) | 2.72<br>(0.76,9.78)  | 1.71<br>(0.06,51.79)  | 1.58<br>(0.72,3.47)  |
| Low fat                     | 2.40<br>(1.08,5.35)  | 1.47<br>(0.53,4.07)         |                      | 0.64<br>(0.47,0.88) | 3.99<br>(1.03,15.39) | 2.51<br>(0.10,64.99)  | 2.32<br>(0.95,5.68)  |
| Medit                       | 3.74<br>(1.62,8.65)  | 2.28<br>(0.80,6.53)         | 1.56<br>(1.14,2.12)  |                     | 6.21<br>(1.57,24.50) | 3.91<br>(0.15,102.70) | 3.62<br>(1.43,9.14)  |
| Modified fat                | 0.60<br>(0.20,1.79)  | 0.37<br>(0.10,1.32)         | 0.25<br>(0.06,0.97)  | 0.16<br>(0.04,0.64) |                      | 0.63<br>(0.02,21.33)  | 0.58<br>(0.18,1.85)  |
| Pritikin                    | 0.96<br>(0.03,27.33) | 0.58<br>(0.02,17.69)        | 0.40<br>(0.02,10.31) | 0.26<br>(0.01,6.72) | 1.59<br>(0.05,53.83) |                       | 0.93<br>(0.03,27.04) |
| Very low fat                | 1.03<br>(0.70,1.54)  | 0.63<br>(0.29,1.38)         | 0.43<br>(0.18,1.05)  | 0.28<br>(0.11,0.70) | 1.72<br>(0.54,5.46)  | 1.08<br>(0.04,31.54)  |                      |

Table S32. Network meta-regression results adjusting for exercise co-interventions for non-fatal myocardial infarction at last follow-up.

| Comparator                  | Treatment            |                             |                      |                      |                      |                       |                      |
|-----------------------------|----------------------|-----------------------------|----------------------|----------------------|----------------------|-----------------------|----------------------|
|                             | Minimal              | Combined low fat-low sodium | Low fat              | Medit                | Modified fat         | Ornish                | Very low fat         |
| Minimal                     |                      | 1.56<br>(0.91,2.67)         | 0.68<br>(0.49,0.95)  | 0.42<br>(0.28,0.63)  | 0.89<br>(0.60,1.33)  | 0.92<br>(0.02,47.20)  | 1.31<br>(0.97,1.79)  |
| Combined low fat-low sodium | 0.64<br>(0.37,1.10)  |                             | 0.44<br>(0.23,0.81)  | 0.27<br>(0.14,0.52)  | 0.57<br>(0.29,1.12)  | 0.59<br>(0.01,31.42)  | 0.84<br>(0.46,1.56)  |
| Low fat                     | 1.47<br>(1.06,2.05)  | 2.29<br>(1.23,4.26)         |                      | 0.62<br>(0.47,0.82)  | 1.31<br>(0.78,2.21)  | 1.36<br>(0.03,70.43)  | 1.93<br>(1.23,3.04)  |
| Medit                       | 2.36<br>(1.59,3.53)  | 3.68<br>(1.91,7.09)         | 1.61<br>(1.21,2.13)  |                      | 2.11<br>(1.19,3.73)  | 2.19<br>(0.04,113.88) | 3.11<br>(1.89,5.10)  |
| Modified fat                | 1.12<br>(0.75,1.67)  | 1.75<br>(0.89,3.42)         | 0.76<br>(0.45,1.28)  | 0.47<br>(0.27,0.84)  |                      | 1.04<br>(0.02,53.96)  | 1.47<br>(0.89,2.45)  |
| Ornish                      | 1.08<br>(0.02,55.18) | 1.68<br>(0.03,89.21)        | 0.73<br>(0.01,38.02) | 0.46<br>(0.01,23.81) | 0.97<br>(0.02,50.27) |                       | 1.42<br>(0.03,73.42) |
| Very low fat                | 0.76<br>(0.56,1.04)  | 1.19<br>(0.64,2.20)         | 0.52<br>(0.33,0.81)  | 0.32<br>(0.20,0.53)  | 0.68<br>(0.41,1.13)  | 0.70<br>(0.01,36.34)  |                      |

Table S33. Network meta-regression results adjusting for drug therapy co-interventions for non-fatal myocardial infarction at last follow-up.

| Comparator                  | Treatment            |                             |                      |                      |                      |                       |                      |
|-----------------------------|----------------------|-----------------------------|----------------------|----------------------|----------------------|-----------------------|----------------------|
|                             | Minimal              | Combined low fat-low sodium | Low fat              | Medit                | Modified fat         | Ornish                | Very low fat         |
| Minimal                     |                      | 1.57<br>(0.93,2.63)         | 0.70<br>(0.53,0.93)  | 0.45<br>(0.33,0.61)  | 0.89<br>(0.60,1.31)  | 0.92<br>(0.02,47.06)  | 1.30<br>(0.98,1.71)  |
| Combined low fat-low sodium | 0.64<br>(0.38,1.07)  |                             | 0.45<br>(0.25,0.80)  | 0.29<br>(0.16,0.52)  | 0.57<br>(0.30,1.08)  | 0.59<br>(0.01,31.04)  | 0.83<br>(0.46,1.49)  |
| Low fat                     | 1.43<br>(1.07,1.90)  | 2.24<br>(1.25,4.00)         |                      | 0.65<br>(0.51,0.82)  | 1.27<br>(0.79,2.06)  | 1.32<br>(0.03,67.86)  | 1.85<br>(1.24,2.76)  |
| Medit                       | 2.21<br>(1.63,2.99)  | 3.46<br>(1.91,6.27)         | 1.55<br>(1.22,1.97)  |                      | 1.97<br>(1.20,3.22)  | 2.04<br>(0.04,105.16) | 2.86<br>(1.90,4.32)  |
| Modified fat                | 1.12<br>(0.76,1.66)  | 1.76<br>(0.92,3.36)         | 0.79<br>(0.49,1.27)  | 0.51<br>(0.31,0.83)  |                      | 1.04<br>(0.02,53.87)  | 1.46<br>(0.90,2.35)  |
| Ornish                      | 1.08<br>(0.02,55.01) | 1.70<br>(0.03,89.26)        | 0.76<br>(0.01,38.94) | 0.49<br>(0.01,25.19) | 0.96<br>(0.02,49.93) |                       | 1.40<br>(0.03,72.02) |
| Very low fat                | 0.77<br>(0.58,1.02)  | 1.21<br>(0.67,2.18)         | 0.54<br>(0.36,0.80)  | 0.35<br>(0.23,0.53)  | 0.69<br>(0.43,1.11)  | 0.71<br>(0.01,36.67)  |                      |

Table S34. Network meta-regression results adjusting for smoking cessation co-interventions for non-fatal myocardial infarction at last follow-up.

| Comparator                  | Treatment            |                             |                      |                      |                      |                      |                      |
|-----------------------------|----------------------|-----------------------------|----------------------|----------------------|----------------------|----------------------|----------------------|
|                             | Minimal              | Combined low fat-low sodium | Low fat              | Medit                | Modified fat         | Ornish               | Very low fat         |
| Minimal                     |                      | 1.58<br>(0.92,2.71)         | 0.80<br>(0.62,1.03)  | 0.49<br>(0.33,0.71)  | 0.89<br>(0.60,1.33)  | 0.92<br>(0.02,47.21) | 1.28<br>(0.94,1.76)  |
| Combined low fat-low sodium | 0.63<br>(0.37,1.09)  |                             | 0.51<br>(0.28,0.91)  | 0.31<br>(0.16,0.59)  | 0.57<br>(0.29,1.11)  | 0.59<br>(0.01,31.07) | 0.81<br>(0.44,1.51)  |
| Low fat                     | 1.25<br>(0.97,1.60)  | 1.97<br>(1.10,3.52)         |                      | 0.61<br>(0.46,0.80)  | 1.11<br>(0.69,1.80)  | 1.15<br>(0.02,59.41) | 1.60<br>(1.10,2.34)  |
| Medit                       | 2.05<br>(1.41,2.99)  | 3.23<br>(1.70,6.15)         | 1.64<br>(1.24,2.17)  |                      | 1.83<br>(1.05,3.20)  | 1.90<br>(0.04,98.60) | 2.63<br>(1.66,4.18)  |
| Modified fat                | 1.12<br>(0.75,1.67)  | 1.77<br>(0.90,3.47)         | 0.90<br>(0.56,1.45)  | 0.55<br>(0.31,0.96)  |                      | 1.04<br>(0.02,53.97) | 1.44<br>(0.86,2.40)  |
| Ornish                      | 1.08<br>(0.02,55.19) | 1.70<br>(0.03,90.31)        | 0.87<br>(0.02,44.56) | 0.53<br>(0.01,27.40) | 0.97<br>(0.02,50.30) |                      | 1.39<br>(0.03,71.74) |
| Very low fat                | 0.78<br>(0.57,1.07)  | 1.23<br>(0.66,2.28)         | 0.62<br>(0.43,0.91)  | 0.38<br>(0.24,0.60)  | 0.70<br>(0.42,1.16)  | 0.72<br>(0.01,37.24) |                      |

Table S35. Network meta-regression results adjusting for psychosocial support co-interventions for non-fatal myocardial infarction at last follow-up.

| Comparator                  | Treatment            |                             |                      |                      |                      |                       |                      |
|-----------------------------|----------------------|-----------------------------|----------------------|----------------------|----------------------|-----------------------|----------------------|
|                             | Minimal              | Combined low fat-low sodium | Low fat              | Medit                | Modified fat         | Ornish                | Very low fat         |
| Minimal                     |                      | 1.55<br>(0.89,2.69)         | 0.66<br>(0.48,0.90)  | 0.41<br>(0.28,0.61)  | 0.89<br>(0.59,1.34)  | 0.92<br>(0.02,47.29)  | 1.22<br>(0.87,1.70)  |
| Combined low fat-low sodium | 0.64<br>(0.37,1.12)  |                             | 0.43<br>(0.23,0.79)  | 0.26<br>(0.14,0.51)  | 0.58<br>(0.29,1.15)  | 0.60<br>(0.01,31.68)  | 0.78<br>(0.42,1.48)  |
| Low fat                     | 1.52<br>(1.11,2.06)  | 2.35<br>(1.27,4.37)         |                      | 0.62<br>(0.47,0.83)  | 1.36<br>(0.81,2.26)  | 1.40<br>(0.03,72.57)  | 1.84<br>(1.17,2.89)  |
| Medit                       | 2.44<br>(1.64,3.61)  | 3.78<br>(1.95,7.31)         | 1.61<br>(1.21,2.14)  |                      | 2.18<br>(1.23,3.85)  | 2.25<br>(0.04,117.42) | 2.96<br>(1.81,4.84)  |
| Modified fat                | 1.12<br>(0.74,1.68)  | 1.73<br>(0.87,3.45)         | 0.74<br>(0.44,1.23)  | 0.46<br>(0.26,0.81)  |                      | 1.03<br>(0.02,54.02)  | 1.36<br>(0.80,2.32)  |
| Ornish                      | 1.08<br>(0.02,55.28) | 1.68<br>(0.03,89.08)        | 0.71<br>(0.01,36.90) | 0.44<br>(0.01,23.15) | 0.97<br>(0.02,50.47) |                       | 1.31<br>(0.03,68.14) |
| Very low fat                | 0.82<br>(0.59,1.15)  | 1.28<br>(0.68,2.41)         | 0.54<br>(0.35,0.85)  | 0.34<br>(0.21,0.55)  | 0.74<br>(0.43,1.26)  | 0.76<br>(0.01,39.46)  |                      |

Table S36. Network meta-regression results adjusting for exercise co-interventions for unplanned cardiovascular interventions at last follow-up.

| Comparator                  | Treatment           |                             |                     |                     |                      |                      |
|-----------------------------|---------------------|-----------------------------|---------------------|---------------------|----------------------|----------------------|
|                             | Minimal             | Combined low fat-low sodium | Low fat             | Medit               | Ornish               | Very low fat         |
| Minimal                     |                     | 1.35<br>(0.44,4.14)         | 0.44<br>(0.14,1.36) | 0.51<br>(0.23,1.15) | 0.92<br>(0.22,3.88)  | 1.30<br>(0.43,3.91)  |
| Combined low fat-low sodium | 0.74<br>(0.24,2.27) |                             | 0.33<br>(0.07,1.60) | 0.38<br>(0.10,1.51) | 0.68<br>(0.11,4.22)  | 0.96<br>(0.20,4.63)  |
| Low fat                     | 2.27<br>(0.73,7.00) | 3.06<br>(0.62,14.99)        |                     | 1.17<br>(0.46,2.92) | 2.08<br>(0.33,12.98) | 2.95<br>(0.61,14.26) |
| Medit                       | 1.95<br>(0.87,4.36) | 2.63<br>(0.66,10.44)        | 0.86<br>(0.34,2.15) |                     | 1.79<br>(0.34,9.32)  | 2.53<br>(0.65,9.91)  |
| Ornish                      | 1.09<br>(0.26,4.61) | 1.47<br>(0.24,9.13)         | 0.48<br>(0.08,3.00) | 0.56<br>(0.11,2.93) |                      | 1.42<br>(0.23,8.70)  |
| Very low fat                | 0.77<br>(0.26,2.31) | 1.04<br>(0.22,4.98)         | 0.34<br>(0.07,1.64) | 0.39<br>(0.10,1.55) | 0.71<br>(0.11,4.33)  |                      |

Table S37. Network meta-regression results adjusting for drug therapy co-interventions for unplanned cardiovascular interventions at last follow-up.

| Comparator                  | Treatment           |                             |                     |                     |                     |                     |
|-----------------------------|---------------------|-----------------------------|---------------------|---------------------|---------------------|---------------------|
|                             | Minimal             | Combined low fat-low sodium | Low fat             | Medit               | Ornish              | Very low fat        |
| Minimal                     |                     | 1.35<br>(0.55,3.29)         | 0.56<br>(0.25,1.25) | 0.66<br>(0.37,1.17) | 0.92<br>(0.26,3.28) | 1.16<br>(0.57,2.36) |
| Combined low fat-low sodium | 0.74<br>(0.30,1.81) |                             | 0.42<br>(0.13,1.38) | 0.49<br>(0.17,1.41) | 0.68<br>(0.14,3.22) | 0.86<br>(0.27,2.68) |
| Low fat                     | 1.78<br>(0.80,3.94) | 2.40<br>(0.73,7.92)         |                     | 1.17<br>(0.58,2.38) | 1.63<br>(0.36,7.32) | 2.06<br>(0.73,5.82) |
| Medit                       | 1.52<br>(0.86,2.69) | 2.05<br>(0.71,5.91)         | 0.85<br>(0.42,1.73) |                     | 1.39<br>(0.35,5.63) | 1.76<br>(0.73,4.27) |
| Ornish                      | 1.09<br>(0.31,3.89) | 1.47<br>(0.31,6.96)         | 0.61<br>(0.14,2.75) | 0.72<br>(0.18,2.90) |                     | 1.26<br>(0.29,5.43) |
| Very low fat                | 0.86<br>(0.42,1.76) | 1.16<br>(0.37,3.64)         | 0.49<br>(0.17,1.37) | 0.57<br>(0.23,1.38) | 0.79<br>(0.18,3.40) |                     |

Table S38. Network meta-regression results adjusting for smoking cessation co-interventions for unplanned cardiovascular interventions at last follow-up.

| Comparator                  | Treatment           |                             |                     |                     |                     |                     |
|-----------------------------|---------------------|-----------------------------|---------------------|---------------------|---------------------|---------------------|
|                             | Minimal             | Combined low fat-low sodium | Low fat             | Medit               | Ornish              | Very low fat        |
| Minimal                     | .                   | 1.35<br>(0.58,3.15)         | 0.84<br>(0.41,1.71) | 0.68<br>(0.36,1.27) | 0.92<br>(0.26,3.18) | 1.16<br>(0.59,2.31) |
| Combined low fat-low sodium | 0.74<br>(0.32,1.73) |                             | 0.62<br>(0.21,1.88) | 0.50<br>(0.17,1.44) | 0.68<br>(0.15,3.07) | 0.86<br>(0.29,2.56) |
| Low fat                     | 1.19<br>(0.58,2.43) | 1.61<br>(0.53,4.87)         |                     | 0.80<br>(0.41,1.59) | 1.09<br>(0.26,4.59) | 1.39<br>(0.54,3.59) |
| Medit                       | 1.48<br>(0.79,2.79) | 2.00<br>(0.69,5.76)         | 1.24<br>(0.63,2.46) |                     | 1.36<br>(0.34,5.49) | 1.72<br>(0.70,4.27) |
| Ornish                      | 1.09<br>(0.31,3.78) | 1.47<br>(0.33,6.63)         | 0.91<br>(0.22,3.84) | 0.74<br>(0.18,2.97) |                     | 1.27<br>(0.31,5.25) |
| Very low fat                | 0.86<br>(0.43,1.70) | 1.16<br>(0.39,3.45)         | 0.72<br>(0.28,1.87) | 0.58<br>(0.23,1.44) | 0.79<br>(0.19,3.26) |                     |



Table S39. Network meta-regression results adjusting for psychosocial support co-interventions for unplanned cardiovascular interventions at last follow-up.

| Comparator                  | Treatment           |                             |                     |                     |                      |                     |
|-----------------------------|---------------------|-----------------------------|---------------------|---------------------|----------------------|---------------------|
|                             | Minimal             | Combined low fat-low sodium | Low fat             | Medit               | Ornish               | Very low fat        |
| Minimal                     | .                   | 1.35<br>(0.45,4.07)         | 0.44<br>(0.21,0.94) | 0.42<br>(0.18,0.95) | 0.92<br>(0.22,3.84)  | 0.93<br>(0.41,2.09) |
| Combined low fat-low sodium | 0.74<br>(0.25,2.23) |                             | 0.33<br>(0.09,1.25) | 0.31<br>(0.08,1.23) | 0.68<br>(0.11,4.14)  | 0.69<br>(0.17,2.71) |
| Low fat                     | 2.26<br>(1.06,4.82) | 3.05<br>(0.80,11.63)        |                     | 0.95<br>(0.43,2.08) | 2.07<br>(0.41,10.46) | 2.10<br>(0.70,6.27) |
| Medit                       | 2.39<br>(1.05,5.44) | 3.23<br>(0.81,12.77)        | 1.06<br>(0.48,2.33) |                     | 2.19<br>(0.42,11.42) | 2.22<br>(0.71,6.94) |
| Ornish                      | 1.09<br>(0.26,4.56) | 1.47<br>(0.24,8.96)         | 0.48<br>(0.10,2.43) | 0.46<br>(0.09,2.37) |                      | 1.01<br>(0.20,5.24) |
| Very low fat                | 1.08<br>(0.48,2.43) | 1.45<br>(0.37,5.73)         | 0.48<br>(0.16,1.43) | 0.45<br>(0.14,1.41) | 0.99<br>(0.19,5.13)  |                     |

Table S40. Network meta-regression results adjusting for follow-up duration (in increments of 1 month) for all-cause mortality.

|                             |                                  | OR   | P value | 95% CI |        |
|-----------------------------|----------------------------------|------|---------|--------|--------|
| Combined low fat-low sodium | Follow-up (per 1 month duration) | 1.00 | 0.953   | 0.99   | 1.01   |
|                             | Adjusted for follow-up duration  | 1.03 | 0.910   | 0.65   | 1.63   |
| Low fat                     | Follow-up (per 1 month duration) | 1.00 | 0.484   | 1.00   | 1.00   |
|                             | Adjusted for follow-up duration  | 0.93 | 0.580   | 0.71   | 1.21   |
| Mediterranean               | Follow-up (per 1 month duration) | 1.01 | 0.031   | 1.00   | 1.02   |
|                             | Adjusted for follow-up duration  | 0.42 | 0.002   | 0.24   | 0.74   |
| Ornish                      | Follow-up (per 1 month duration) | 1.00 | 0.901   | 0.95   | 1.06   |
|                             | Adjusted for follow-up duration  | 1.91 | 0.774   | 0.02   | 157.50 |
| Very low fat                | Follow-up (per 1 month duration) | 1.00 | 0.560   | 1.00   | 1.00   |
|                             | Adjusted for follow-up duration  | 0.79 | 0.493   | 0.40   | 1.56   |
| Modified fat                | Follow-up (per 1 month duration) | 1.00 | 0.146   | 0.99   | 1.00   |
|                             | Adjusted for follow-up duration  | 1.54 | 0.149   | 0.86   | 2.75   |
| Pritikin                    | Follow-up (per 1 month duration) | .    | .       | .      | .      |
|                             | Adjusted for follow-up duration  | 0.23 | 0.383   | 0.01   | 6.11   |

Table S41. Network meta-regression results showing the subgroup effect for population type on all-cause mortality.

|                             |                               | OR   | P value | 95% CI |       |
|-----------------------------|-------------------------------|------|---------|--------|-------|
| Combined low fat-low sodium | Primary prevention population | 0.99 | 0.971   | 0.59   | 1.65  |
|                             | Adjusted                      | 1.02 | 0.927   | 0.71   | 1.47  |
| Low fat                     | Primary prevention population | 0.94 | 0.695   | 0.69   | 1.28  |
|                             | Adjusted                      | 0.85 | 0.094   | 0.70   | 1.03  |
| Mediterranean               | Primary prevention population | .    | .       | .      | .     |
|                             | Adjusted                      | 0.70 | 0.006   | 0.54   | 0.90  |
| Ornish                      | Primary prevention population | .    | .       | .      | .     |
|                             | Adjusted                      | 2.43 | 0.450   | 0.24   | 24.29 |
| Very low fat                | Primary prevention population | 1.07 | 0.972   | 0.02   | 55.46 |
|                             | Adjusted                      | 0.94 | 0.651   | 0.71   | 1.24  |
| Modified fat                | Primary prevention population | .    | .       | .      | .     |
|                             | Adjusted                      | 1.06 | 0.700   | 0.78   | 1.43  |
| Pritikin                    | Primary prevention population | .    | .       | .      | .     |
|                             | Adjusted                      | 0.22 | 0.359   | 0.01   | 5.69  |

P value in front of subgroup variable is for test of interaction, while the OR and its 95% CI for adjusted row shows the effect of intervention in the group without variable.

Table S42. Network meta-regression results adjusting for intervention duration (in increments of 1 month) for all-cause mortality.

|                             |                                    | OR   | P value      | 95% CI |        |
|-----------------------------|------------------------------------|------|--------------|--------|--------|
| Combined low fat-low sodium | Duration (per 1 month duration)    | 1.00 | 0.985        | 0.99   | 1.01   |
|                             | Adjusted for intervention duration | 1.02 | 0.952        | 0.62   | 1.67   |
| Low fat                     | Duration (per 1 month duration)    | 1.00 | 0.722        | 1.00   | 1.00   |
|                             | Adjusted for intervention duration | 0.88 | 0.171        | 0.74   | 1.06   |
| Mediterranean               | Duration (per 1 month duration)    | 1.00 | 0.858        | 0.98   | 1.03   |
|                             | Adjusted for intervention duration | 0.58 | 0.174        | 0.26   | 1.27   |
| Ornish                      | Duration (per 1 month duration)    | 0.98 | 0.901        | 0.72   | 1.33   |
|                             | Adjusted for intervention duration | 3.34 | 0.668        | 0.01   | 821.19 |
| Very low fat                | Duration (per 1 month duration)    | 1.00 | 0.465        | 0.99   | 1.01   |
|                             | Adjusted for intervention duration | 0.72 | 0.413        | 0.33   | 1.58   |
| Modified fat                | Duration (per 1 month duration)    | 0.97 | <b>0.047</b> | 0.94   | 1.00   |
|                             | Adjusted for intervention duration | 4.52 | 0.044        | 1.04   | 19.61  |
| Pritikin                    | Duration (per 1 month duration)    |      |              |        |        |
|                             | Adjusted for intervention duration | 0.22 | 0.367        | 0.01   | 5.81   |

Table S43. Network meta-regression results showing the subgroup effect for intervention intensity on all-cause mortality.

|                             |                        | OR   | 95% CI |       | P value |
|-----------------------------|------------------------|------|--------|-------|---------|
| Combined low fat-low sodium | Test of interaction    | 0.98 | 0.52   | 1.85  | 0.954   |
|                             | Adjusted for intensity | 1.02 | 0.76   | 1.36  | 0.895   |
| Low fat                     | Test of interaction    | 0.99 | 0.71   | 1.38  | 0.962   |
|                             | Adjusted for intensity | 0.83 | 0.69   | 1.00  | 0.052   |
| Mediterranean               | Test of interaction    | 0.21 | 0.01   | 4.18  | 0.304   |
|                             | Adjusted for intensity | 0.69 | 0.53   | 0.90  | 0.007   |
| Ornish                      | Test of interaction    | .    | .      | .     | .       |
|                             | Adjusted for intensity | 2.43 | 0.24   | 24.30 | 0.450   |
| Very low fat                | Test of interaction    | 0.88 | 0.19   | 4.08  | 0.871   |
|                             | Adjusted for intensity | 1.06 | 0.23   | 4.79  | 0.939   |
| Modified fat                | Test of interaction    | .    | .      | .     | .       |
|                             | Adjusted for intensity | 1.06 | 0.78   | 1.44  | 0.699   |
| Pritikin                    | Test of interaction    | .    | .      | .     | .       |
|                             | Adjusted for intensity | 0.21 | 0.01   | 5.57  | 0.353   |

P value in front of subgroup variable is for test of interaction, while the OR and its 95% CI for adjusted row shows the effect of intervention in the group without variable.

Table S44. Network meta-regression results adjusting for follow-up duration (in increments of 1 month) for cardiovascular mortality.

|                             |                                  | OR   | P value | 95% CI |       |
|-----------------------------|----------------------------------|------|---------|--------|-------|
| Combined low fat-low sodium | Follow-up (per 1 month duration) | 0.96 | 0.092   | 0.91   | 1.01  |
|                             | Adjusted for follow-up duration  | 7.00 | 0.092   | 0.73   | 67.25 |
| Low fat                     | Follow-up (per 1 month duration) | 1.00 | 0.670   | 1.00   | 1.01  |
|                             | Adjusted for follow-up duration  | 0.74 | 0.268   | 0.43   | 1.26  |
| Mediterranean               | Follow-up (per 1 month duration) | 1.01 | 0.271   | 0.99   | 1.03  |
|                             | Adjusted for follow-up duration  | 0.35 | 0.017   | 0.15   | 0.83  |
| Modified fat                | Follow-up (per 1 month duration) | 0.99 | 0.068   | 0.98   | 1.00  |
|                             | Adjusted for follow-up duration  | 2.01 | 0.066   | 0.95   | 4.24  |
| Very low fat                | Follow-up (per 1 month duration) | 1.00 | 0.950   | 0.92   | 1.09  |
|                             | Adjusted for follow-up duration  | 1.33 | 0.878   | 0.03   | 52.64 |
| Pritikin                    | Follow-up (per 1 month duration) | 1.00 | 0.977   | 0.99   | 1.01  |
|                             | Adjusted for follow-up duration  | 0.98 | 0.958   | 0.42   | 2.30  |

Table S45. Network meta-regression results showing the subgroup effect for population type on cardiovascular mortality.

|                             |                               | OR   | P value | 95% CI |       |
|-----------------------------|-------------------------------|------|---------|--------|-------|
| Combined low fat-low sodium | Primary prevention population | 0.08 | 0.095   | 0.00   | 1.56  |
|                             | Adjusted                      | 1.17 | 0.629   | 0.62   | 2.20  |
| Low fat                     | Primary prevention population | 1.02 | 0.941   | 0.57   | 1.82  |
|                             | Adjusted                      | 0.78 | 0.165   | 0.55   | 1.11  |
| Mediterranean               | Primary prevention population | .    | .       | .      | .     |
|                             | Adjusted                      | 0.54 | 0.002   | 0.37   | 0.80  |
| Modified fat                | Primary prevention population | .    | .       | .      | .     |
|                             | Adjusted                      | 1.11 | 0.598   | 0.75   | 1.67  |
| Ornish                      | Primary prevention population | .    | .       | .      | .     |
|                             | Adjusted                      | 1.48 | 0.670   | 0.25   | 8.85  |
| Very low fat                | Primary prevention population | 1.02 | 0.994   | 0.02   | 54.50 |
|                             | Adjusted                      | 0.99 | 0.976   | 0.64   | 1.55  |

P value in front of subgroup variable is for test of interaction, while the OR and its 95% CI for adjusted row shows the effect of intervention in the group without variable.

Table S46. Network meta-regression results adjusting for intervention duration (in increments of 1 month) for cardiovascular mortality.

|                             |                                    | OR   | P value      | 95% CI |       |
|-----------------------------|------------------------------------|------|--------------|--------|-------|
| Combined low fat-low sodium | Duration (per 1 month duration)    | 0.96 | 0.090        | 0.91   | 1.01  |
|                             | Adjusted for intervention duration | 7.00 | 0.084        | 0.77   | 63.63 |
| Low fat                     | Duration (per 1 month duration)    | 1.00 | 0.975        | 0.99   | 1.01  |
|                             | Adjusted for intervention duration | 0.83 | 0.464        | 0.50   | 1.37  |
| Mediterranean               | Duration (per 1 month duration)    | 1.01 | 0.263        | 0.99   | 1.03  |
|                             | Adjusted for intervention duration | 0.38 | 0.013        | 0.18   | 0.81  |
| Modified fat                | Duration (per 1 month duration)    | 0.96 | <b>0.021</b> | 0.93   | 0.99  |
|                             | Adjusted for intervention duration | 7.86 | 0.019        | 1.41   | 43.79 |
| Ornish                      | Duration (per 1 month duration)    | 1.00 | 0.950        | 0.92   | 1.09  |
|                             | Adjusted for intervention duration | 1.33 | 0.878        | 0.03   | 52.11 |
| Very low fat                | Duration (per 1 month duration)    | 1.00 | 0.787        | 0.99   | 1.01  |
|                             | Adjusted for intervention duration | 1.12 | 0.823        | 0.41   | 3.06  |

Table S47. Network meta-regression results showing the subgroup effect for intervention intensity on cardiovascular mortality.

|                             |                        | OR   | 95% CI |       | P value |
|-----------------------------|------------------------|------|--------|-------|---------|
| Combined low fat-low sodium | Test of interaction    | .    | .      | .     | .       |
|                             | Adjusted for intensity | 1.03 | 0.53   | 2.01  | 0.933   |
| Low fat                     | Test of interaction    | 1.03 | 0.51   | 2.08  | 0.940   |
|                             | Adjusted for intensity | 0.76 | 0.55   | 1.06  | 0.110   |
| Mediterranean               | Test of interaction    | 0.67 | 0.02   | 18.10 | 0.813   |
|                             | Adjusted for intensity | 0.52 | 0.34   | 0.78  | 0.002   |
| Modified fat                | Test of interaction    | .    | .      | .     | .       |
|                             | Adjusted for intensity | 1.12 | 0.74   | 1.72  | 0.588   |
| Ornish                      | Test of interaction    | .    | .      | .     | .       |
|                             | Adjusted for intensity | 1.48 | 0.24   | 8.90  | 0.671   |
| Very low fat                | Test of interaction    | 1.35 | 0.23   | 7.90  | 0.741   |
|                             | Adjusted for intensity | 0.76 | 0.14   | 4.14  | 0.747   |

P value in front of subgroup variable is for test of interaction, while the OR and its 95% CI for adjusted row shows the effect of intervention in the group without variable.

Table S48. Network meta-regression results adjusting for follow-up duration (in increments of 1 month) for stroke.

|                             |                                  | OR     | P value | 95% CI |       |
|-----------------------------|----------------------------------|--------|---------|--------|-------|
| Combined low fat-low sodium | Follow-up (per 1 month duration) | 0.88   | 0.365   | 0.67   | 1.16  |
|                             | Adjusted for follow-up duration  | 118.98 | 0.406   | 0.00   | .     |
| Low fat                     | Follow-up (per 1 month duration) | 1.00   | 0.827   | 0.98   | 1.01  |
|                             | Adjusted for follow-up duration  | 1.06   | 0.935   | 0.25   | 4.58  |
| Mediterranean               | Follow-up (per 1 month duration) | 1.00   | 0.947   | 0.97   | 1.03  |
|                             | Adjusted for follow-up duration  | 0.66   | 0.563   | 0.16   | 2.71  |
| Modified fat                | Follow-up (per 1 month duration) | 0.90   | 0.468   | 0.68   | 1.19  |
|                             | Adjusted for follow-up duration  | 723.98 | 0.431   | 0.00   | .     |
| Very low fat                | Follow-up (per 1 month duration) | 1.00   | 0.977   | 0.96   | 1.04  |
|                             | Adjusted for follow-up duration  | 1.02   | 0.991   | 0.02   | 43.70 |
| Pritikin                    | Follow-up (per 1 month duration) | .      | .       | .      | .     |
|                             | Adjusted for follow-up duration  | 2.61   | 0.596   | 0.07   | 91.08 |

Table S49. Network meta-regression results showing the subgroup effect for population type on stroke.

|                             |                               | OR   | P value | 95% CI |        |
|-----------------------------|-------------------------------|------|---------|--------|--------|
| Combined low fat-low sodium | Primary prevention population | 4.33 | 0.409   | 0.13   | 140.13 |
|                             | Adjusted                      | 0.59 | 0.261   | 0.23   | 1.48   |
| Low fat                     | Primary prevention population | 0.74 | 0.661   | 0.19   | 2.84   |
|                             | Adjusted                      | 1.14 | 0.827   | 0.35   | 3.74   |
| Mediterranean               | Primary prevention population | 0.41 | 0.501   | 0.03   | 5.41   |
|                             | Adjusted                      | 0.67 | 0.282   | 0.32   | 1.40   |
| Modified fat                | Primary prevention population | .    | .       | .      | .      |
|                             | Adjusted                      | 1.71 | 0.388   | 0.51   | 5.78   |
| Very low fat                | Primary prevention population | 1.04 | 0.977   | 0.06   | 19.79  |
|                             | Adjusted                      | 0.97 | 0.925   | 0.47   | 2.00   |
| Pritikin                    | Primary prevention population | .    | .       | .      | .      |
|                             | Adjusted                      | 2.87 | 0.557   | 0.09   | 96.52  |

P value in front of subgroup variable is for test of interaction, while the OR and its 95% CI for adjusted row shows the effect of intervention in the group without variable.

Table S50. Network meta-regression results adjusting for intervention duration (in increments of 1 month) for stroke.

|                             |                                    | OR    | P value | 95% CI |        |
|-----------------------------|------------------------------------|-------|---------|--------|--------|
| Combined low fat-low sodium | Duration (per 1 month duration)    | 0.76  | 0.357   | 0.42   | 1.37   |
|                             | Adjusted for intervention duration | 85.96 | 0.375   | 0.00   | 342.00 |
| Low fat                     | Duration (per 1 month duration)    | 1.00  | 0.697   | 0.98   | 1.01   |
|                             | Adjusted for intervention duration | 1.17  | 0.825   | 0.29   | 4.82   |
| Mediterranean               | Duration (per 1 month duration)    | 1.00  | 0.851   | 0.96   | 1.03   |
|                             | Adjusted for intervention duration | 0.72  | 0.659   | 0.17   | 3.03   |
| Modified fat                | Duration (per 1 month duration)    | 0.90  | 0.474   | 0.68   | 1.20   |
|                             | Adjusted for intervention duration | 23.98 | 0.436   | 0.00   | 113.00 |
| Very low fat                | Duration (per 1 month duration)    | 1.00  | 0.977   | 0.96   | 1.04   |
|                             | Adjusted for intervention duration | 1.02  | 0.991   | 0.02   | 45.36  |
| Pritikin                    | Duration (per 1 month duration)    | .     | .       | .      | .      |
|                             | Adjusted for intervention duration | 2.82  | 0.567   | 0.08   | 98.68  |

Table S51. Network meta-regression results showing the subgroup effect for intervention intensity on stroke.

|                             |                        | OR   | 95% CI |        | P value |
|-----------------------------|------------------------|------|--------|--------|---------|
| Combined low fat-low sodium | Test of interaction    | 5.46 | 0.20   | 147.60 | 0.313   |
|                             | Adjusted for intensity | 0.59 | 0.30   | 1.18   | 0.134   |
| Low fat                     | Test of interaction    | 1.39 | 0.73   | 2.65   | 0.316   |
|                             | Adjusted for intensity | 0.77 | 0.44   | 1.35   | 0.358   |
| Mediterranean               | Test of interaction    | 6.16 | 0.23   | 161.66 | 0.276   |
|                             | Adjusted for intensity | 0.53 | 0.31   | 0.90   | 0.019   |
| Modified fat                | Test of interaction    | .    | .      | .      | .       |
|                             | Adjusted for intensity | 1.66 | 0.56   | 4.92   | 0.362   |
| Very low fat                | Test of interaction    | 0.96 | 0.06   | 15.94  | 0.976   |
|                             | Adjusted for intensity | 1.01 | 0.06   | 16.32  | 0.995   |
| Pritikin                    | Test of interaction    | .    | .      | .      | .       |
|                             | Adjusted for intensity | 1.93 | 0.07   | 52.36  | 0.697   |

P value in front of subgroup variable is for test of interaction, while the OR and its 95% CI for adjusted row shows the effect of intervention in the group without variable.

Table S52. Network meta-regression results adjusting for follow-up duration (in increments of 1 month) for non-fatal myocardial infarction.

|                             |                                  | OR   | P value | 95% CI |       |
|-----------------------------|----------------------------------|------|---------|--------|-------|
| Combined low fat-low sodium | Follow-up (per 1 month duration) | 1.07 | 0.420   | 0.91   | 1.25  |
|                             | Adjusted for follow-up duration  | 0.11 | 0.504   | 0.00   | 75.33 |
| Low fat                     | Follow-up (per 1 month duration) | 1.00 | 0.438   | 1.00   | 1.01  |
|                             | Adjusted for follow-up duration  | 0.68 | 0.061   | 0.45   | 1.02  |
| Mediterranean               | Follow-up (per 1 month duration) | 1.01 | 0.093   | 1.00   | 1.03  |
|                             | Adjusted for follow-up duration  | 0.28 | 0.000   | 0.14   | 0.56  |
| Modified fat                | Follow-up (per 1 month duration) | 0.98 | 0.345   | 0.95   | 1.02  |
|                             | Adjusted for follow-up duration  | 2.10 | 0.425   | 0.34   | 12.95 |
| Ornish                      | Follow-up (per 1 month duration) | .    | .       | .      | .     |
|                             | Adjusted for follow-up duration  | 0.92 | 0.969   | 0.02   | 47.06 |
| Very low fat                | Follow-up (per 1 month duration) | 1.01 | 0.207   | 1.00   | 1.02  |
|                             | Adjusted for follow-up duration  | 0.75 | 0.482   | 0.34   | 1.67  |

Table S53. Network meta-regression results showing the subgroup effect for population type on non-fatal myocardial infarction.

|                             |                               | OR   | P value | 95% CI |       |
|-----------------------------|-------------------------------|------|---------|--------|-------|
| Combined low fat-low sodium | Primary prevention population | 0.48 | 0.492   | 0.06   | 3.88  |
|                             | Adjusted                      | 1.66 | 0.082   | 0.94   | 2.96  |
| Low fat                     | Primary prevention population | 1.15 | 0.536   | 0.74   | 1.79  |
|                             | Adjusted                      | 0.70 | 0.031   | 0.50   | 0.97  |
| Mediterranean               | Primary prevention population | .    | .       | .      | .     |
|                             | Adjusted                      | 0.45 | 0.000   | 0.32   | 0.63  |
| Modified fat                | Primary prevention population | .    | .       | .      | .     |
|                             | Adjusted                      | 0.89 | 0.594   | 0.59   | 1.35  |
| Ornish                      | Primary prevention population | .    | .       | .      | .     |
|                             | Adjusted                      | 0.92 | 0.969   | 0.02   | 47.31 |
| Very low fat                | Primary prevention population | 1.73 | 0.660   | 0.15   | 20.06 |
|                             | Adjusted                      | 1.17 | 0.378   | 0.82   | 1.68  |

P value in front of subgroup variable is for test of interaction, while the OR and its 95% CI for adjusted row shows the effect of intervention in the group without variable.



Table S54. Network meta-regression results adjusting for intervention duration (in increments of 1 month) for non-fatal myocardial infarction.

|                             |                                    | OR   | P value | 95% CI |         |
|-----------------------------|------------------------------------|------|---------|--------|---------|
| Combined low fat-low sodium | Duration (per 1 month duration)    | 1.15 | 0.416   | 0.82   | 1.63    |
|                             | Adjusted for intervention duration | 0.00 | 0.453   | 0.00   | 6785.94 |
| Low fat                     | Duration (per 1 month duration)    | 1.00 | 0.314   | 1.00   | 1.01    |
|                             | Adjusted for intervention duration | 0.65 | 0.033   | 0.44   | 0.97    |
| Mediterranean               | Duration (per 1 month duration)    | 1.01 | 0.079   | 1.00   | 1.03    |
|                             | Adjusted for intervention duration | 0.27 | 0.000   | 0.14   | 0.54    |
| Modified fat                | Duration (per 1 month duration)    | 0.98 | 0.345   | 0.95   | 1.02    |
|                             | Adjusted for intervention duration | 2.10 | 0.425   | 0.34   | 12.95   |
| Ornish                      | Duration (per 1 month duration)    | .    | .       | .      | .       |
|                             | Adjusted for intervention duration | 0.92 | 0.969   | 0.02   | 47.06   |
| Very low fat                | Duration (per 1 month duration)    | 1.01 | 0.131   | 1.00   | 1.02    |
|                             | Adjusted for intervention duration | 0.69 | 0.356   | 0.31   | 1.52    |

Table S55. Network meta-regression results showing the subgroup effect for intervention intensity on non-fatal myocardial infarction.

|                             |                        | OR   | 95% CI |       | P value |
|-----------------------------|------------------------|------|--------|-------|---------|
| Combined low fat-low sodium | Test of interaction    | 0.51 | 0.07   | 4.02  | 0.526   |
|                             | Adjusted for intensity | 1.66 | 0.97   | 2.85  | 0.063   |
| Low fat                     | Test of interaction    | 1.25 | 0.88   | 1.76  | 0.209   |
|                             | Adjusted for intensity | 0.69 | 0.52   | 0.90  | 0.006   |
| Mediterranean               | Test of interaction    | 0.77 | 0.03   | 19.57 | 0.874   |
|                             | Adjusted for intensity | 0.45 | 0.34   | 0.60  | 0.000   |
| Modified fat                | Test of interaction    | .    | .      | .     | .       |
|                             | Adjusted for intensity | 0.89 | 0.60   | 1.31  | 0.557   |
| Ornish                      | Test of interaction    | .    | .      | .     | .       |
|                             | Adjusted for intensity | 0.92 | 0.02   | 47.06 | 0.969   |
| Very low fat                | Test of interaction    | 2.30 | 0.77   | 6.90  | 0.138   |
|                             | Adjusted for intensity | 0.56 | 0.19   | 1.62  | 0.285   |

P value in front of subgroup variable is for test of interaction, while the OR and its 95% CI for adjusted row shows the effect of intervention in the group without variable.

Table S56. Network meta-regression results adjusting for follow-up duration (in increments of 1 month) for unplanned cardiovascular interventions.

|                             |                                  | OR   | P value | 95% CI |      |
|-----------------------------|----------------------------------|------|---------|--------|------|
| Combined low fat-low sodium | Follow-up (per 1 month duration) | .    | .       | .      | .    |
|                             | Adjusted for follow-up duration  | 1.35 | 0.619   | 0.41   | 4.40 |
| Low fat                     | Follow-up (per 1 month duration) | 1.00 | 0.967   | 0.99   | 1.01 |
|                             | Adjusted for follow-up duration  | 0.57 | 0.201   | 0.24   | 1.35 |
| Mediterranean               | Follow-up (per 1 month duration) | 1.00 | 0.840   | 0.95   | 1.04 |
|                             | Adjusted for follow-up duration  | 0.93 | 0.923   | 0.20   | 4.37 |
| Ornish                      | Follow-up (per 1 month duration) | .    | .       | .      | .    |
|                             | Adjusted for follow-up duration  | 0.92 | 0.910   | 0.21   | 4.08 |
| Very low fat                | Follow-up (per 1 month duration) | 1.01 | 0.596   | 0.99   | 1.03 |
|                             | Adjusted for follow-up duration  | 0.66 | 0.574   | 0.16   | 2.78 |

Table S57. Network meta-regression results showing the subgroup effect for population type on unplanned cardiovascular interventions.

|                             |                               | OR   | P value | 95% CI |      |
|-----------------------------|-------------------------------|------|---------|--------|------|
| Combined low fat-low sodium | Primary prevention population | .    | .       | .      | .    |
|                             | Adjusted                      | 1.35 | 0.545   | 0.51   | 3.56 |
| Low fat                     | Primary prevention population | 0.89 | 0.815   | 0.33   | 2.37 |
|                             | Adjusted                      | 0.63 | 0.137   | 0.35   | 1.16 |
| Mediterranean               | Primary prevention population | .    | .       | .      | .    |
|                             | Adjusted                      | 0.82 | 0.468   | 0.48   | 1.40 |
| Ornish                      | Primary prevention population | .    | .       | .      | .    |
|                             | Adjusted                      | 0.92 | 0.899   | 0.24   | 3.47 |
| Very low fat                | Primary prevention population | .    | .       | .      | .    |
|                             | Adjusted                      | 0.94 | 0.835   | 0.50   | 1.76 |

P value in front of subgroup variable is for test of interaction, while the OR and its 95% CI for adjusted row shows the effect of intervention in the group without variable.

Table S58. Network meta-regression results adjusting for intervention duration (in increments of 1 month) for unplanned cardiovascular interventions.

|                             |                                    | OR   | P value | 95% CI |      |
|-----------------------------|------------------------------------|------|---------|--------|------|
| Combined low fat-low sodium | Duration (per 1 month duration)    | .    | .       | .      | .    |
|                             | Adjusted for intervention duration | 1.35 | 0.617   | 0.42   | 4.37 |
| Low fat                     | Duration (per 1 month duration)    | 1.00 | 0.937   | 0.99   | 1.01 |
|                             | Adjusted for intervention duration | 0.62 | 0.282   | 0.26   | 1.48 |
| Mediterranean               | Duration (per 1 month duration)    | 1.01 | 0.651   | 0.97   | 1.06 |
|                             | Adjusted for intervention duration | 0.53 | 0.394   | 0.12   | 2.31 |
| Ornish                      | Duration (per 1 month duration)    | .    | .       | .      | .    |
|                             | Adjusted for intervention duration | 0.92 | 0.910   | 0.21   | 4.05 |
| Very low fat                | Duration (per 1 month duration)    | 1.01 | 0.594   | 0.99   | 1.03 |
|                             | Adjusted for intervention duration | 0.66 | 0.571   | 0.16   | 2.76 |

Table S59. Network meta-regression results showing the subgroup effect for intervention intensity on unplanned cardiovascular interventions.

|                             |                        | OR   | 95% CI |       | P value |
|-----------------------------|------------------------|------|--------|-------|---------|
| Combined low fat-low sodium | Test of interaction    |      |        |       |         |
|                             | Adjusted for intensity | 1.35 | 0.52   | 3.53  | 0.540   |
| Low fat                     | Test of interaction    | 1.12 | 0.45   | 2.82  | 0.805   |
|                             | Adjusted for intensity | 0.56 | 0.29   | 1.11  | 0.097   |
| Mediterranean               | Test of interaction    | 2.15 | 0.42   | 10.91 | 0.357   |
|                             | Adjusted for intensity | 0.73 | 0.40   | 1.31  | 0.285   |
| Ornish                      | Test of interaction    | .    | .      | .     | .       |
|                             | Adjusted for intensity | 0.92 | 0.24   | 3.44  | 0.899   |
| Very low fat                | Test of interaction    | 1.91 | 0.50   | 7.24  | 0.341   |
|                             | Adjusted for intensity | 0.60 | 0.20   | 1.80  | 0.366   |

P value in front of subgroup variable is for test of interaction, while the OR and its 95% CI for adjusted row shows the effect of intervention in the group without variable.

Table S60. Absolute estimates for all-cause mortality prevention at 12 ( $\pm 3$ ) months (intermediate baseline risk). Named dietary programmes network meta-analysis results as risk differences (RD) per 1000 with 95% confidence interval (CI) and corresponding GRADE certainty of evidence (N = 13 RCTs).

|                |                      |                |                     |                     |                |                 |
|----------------|----------------------|----------------|---------------------|---------------------|----------------|-----------------|
| <b>Minimal</b> |                      |                |                     |                     |                |                 |
| -3, -10 to 22  | <b>Mediterranean</b> |                |                     |                     |                |                 |
| 0, -5 to 6     | 2, -9 to 41          | <b>Low fat</b> |                     |                     |                |                 |
| 18, -8 to 169  | 44, -5 to 304        | 19, -9 to 180  | <b>Very low fat</b> |                     |                |                 |
| 73, -8 to 620  | 137, -4 to 764       | 74, -8 to 633  | 24, -12 to 547      | <b>Modified fat</b> |                |                 |
| 18, -10 to 228 | 25, -10 to 339       | 19, -10 to 240 | 0, -12 to 196       | -9, -13 to 143      | <b>Ornish</b>  |                 |
| -10, -13 to 67 | -7, -13 to 130       | -10, -13 to 67 | -12, -13 to 44      | -12, -13 to 23      | -12, -13 to 56 | <b>Pritikin</b> |

|                |                    |               |                    |
|----------------|--------------------|---------------|--------------------|
| High certainty | Moderate certainty | Low certainty | Very low certainty |
|----------------|--------------------|---------------|--------------------|

Table S61. Absolute estimates for all-cause mortality prevention at 12 ( $\pm 3$ ) months (high baseline risk). Named dietary programmes network meta-analysis results as risk differences (RD) per 1000 with 95% confidence interval (CI) and corresponding GRADE certainty of evidence (N = 13 RCTs).

|                 |                      |                 |                     |                     |                 |                 |
|-----------------|----------------------|-----------------|---------------------|---------------------|-----------------|-----------------|
| <b>Minimal</b>  |                      |                 |                     |                     |                 |                 |
| -6, -23 to 49   | <b>Mediterranean</b> |                 |                     |                     |                 |                 |
| -1, -11 to 14   | 4, -21 to 88         | <b>Low fat</b>  |                     |                     |                 |                 |
| 40, -19 to 313  | 95, -12 to 492       | 42, -20 to 329  | <b>Very low fat</b> |                     |                 |                 |
| 150, -18 to 772 | 185, -19 to 837      | 154, -18 to 781 | 53, -27 to 719      | <b>Modified fat</b> |                 |                 |
| 40, -23 to 397  | 94, -17 to 576       | 41, -23 to 413  | 0, -28 to 353       | -20, -30 to 272     | <b>Ornish</b>   |                 |
| -22, -30 to 140 | -16, -29 to 252      | -22, -30 to 140 | -27, -30 to 95      | -29, -30 to 50      | -27, -30 to 119 | <b>Pritikin</b> |

Table S62. Absolute estimates for all-cause mortality prevention at last follow-up (intermediate baseline risk). Named dietary programmes network meta-analysis results as risk differences (RD) per 1000 over 5 years with 95% confidence interval (CI) and corresponding GRADE certainty of evidence (N = 37 RCTs).

|                 |                      |                 |                     |                     |                                    |                 |                 |
|-----------------|----------------------|-----------------|---------------------|---------------------|------------------------------------|-----------------|-----------------|
| <b>Minimal</b>  |                      |                 |                     |                     |                                    |                 |                 |
| -17, -26 to -5  | <b>Mediterranean</b> |                 |                     |                     |                                    |                 |                 |
| -9, -15 to -3   | 7, -3 to 19          | <b>Low fat</b>  |                     |                     |                                    |                 |                 |
| -3, -14 to 10   | 9, -5 to 24          | 7, -6 to 22     | <b>Very low fat</b> |                     |                                    |                 |                 |
| 3, -12 to 22    | 19, -0 to 47         | 12, -4 to 34    | 6, -14 to 32        | <b>Modified fat</b> |                                    |                 |                 |
| 1, -11 to 15    | 13, -2 to 29         | 10, -3 to 27    | 4, -13 to 25        | -2, -19 to 22       | <b>Combined low fat-low sodium</b> |                 |                 |
| 76, -46 to 553  | 93, -29 to 572       | 86, -37 to 565  | 82, -46 to 567      | 71, -47 to 545      | 74, -46 to 551                     | <b>Ornish</b>   |                 |
| -48, -61 to 207 | -31, -45 to 224      | -39, -52 to 217 | -48, -61 to 218     | -49, -61 to 200     | -48, -61 to 205                    | -56, -62 to 177 | <b>Pritikin</b> |

Table S63. Absolute estimates for all-cause mortality prevention at last follow-up (high baseline risk). Named dietary programmes network meta-analysis results as risk differences (RD) per 1000 over 5 years with 95% confidence interval (CI) and corresponding GRADE certainty of evidence (N = 37 RCTs).

|                   |                      |                  |                     |                     |                                    |                   |                 |
|-------------------|----------------------|------------------|---------------------|---------------------|------------------------------------|-------------------|-----------------|
| <b>Minimal</b>    |                      |                  |                     |                     |                                    |                   |                 |
| -36, -58 to -10   | <b>Mediterranean</b> |                  |                     |                     |                                    |                   |                 |
| -20, -33 to -6    | 3, -14 to 23         | <b>Low fat</b>   |                     |                     |                                    |                   |                 |
| -6, -29 to 22     | 18, -10 to 52        | 15, -12 to 46    | <b>Very low fat</b> |                     |                                    |                   |                 |
| 6, -25 to 44      | 42, -1 to 99         | 26, -9 to 70     | 12, -29 to 65       | <b>Modified fat</b> |                                    |                   |                 |
| 2, -23 to 32      | 27, -5 to 67         | 22, -5 to 56     | 8, -28 to 52        | -4, -41 to 44       | <b>Combined low fat-low sodium</b> |                   |                 |
| 145, -104 to 659  | 182, -68 to 697      | 165, -84 to 679  | 155, -103 to 667    | 136, -106 to 653    | 142, -104 to 657                   | <b>Ornish</b>     |                 |
| -109, -141 to 338 | -72, -106 to 376     | -89, -122 to 358 | -108, -141 to 352   | -111, -141 to 330   | -109, -141 to 336                  | -128, -143 to 299 | <b>Pritikin</b> |

Table S64. Absolute estimates for cardiovascular mortality prevention at last follow-up (intermediate baseline risk). Named dietary programmes network meta-analysis results as risk differences (RD) per 1000 over 5 years with 95% confidence interval (CI) and corresponding GRADE certainty of evidence (N = 22 RCTs).

|                |                      |                |                     |                     |                                    |               |
|----------------|----------------------|----------------|---------------------|---------------------|------------------------------------|---------------|
| <b>Minimal</b> |                      |                |                     |                     |                                    |               |
| -13, -17 to -6 | <b>Mediterranean</b> |                |                     |                     |                                    |               |
| -6, -11 to 1   | 3, -5 to 15          | <b>Low fat</b> |                     |                     |                                    |               |
| 0, -10 to 14   | 10, -3 to 32         | 7, -7 to 29    | <b>Very low fat</b> |                     |                                    |               |
| 3, -7 to 17    | 13, -1 to 37         | 11, -5 to 34   | 3, -10 to 26        | <b>Modified fat</b> |                                    |               |
| 2, -12 to 25   | 14, 0 to 42          | 9, -9 to 40    | 2, -14 to 33        | -1, -15 to 26       | <b>Combined low fat-low sodium</b> |               |
| 13, -22 to 179 | 29, -10 to 215       | 23, -20 to 223 | 14, -22 to 189      | 9, -22 to 170       | -8, -26 to 94                      | <b>Ornish</b> |



Table S65. Absolute estimates for cardiovascular mortality prevention at last follow-up (high baseline risk). Named dietary programmes network meta-analysis results as risk differences (RD) per 1000 over 5 years with 95% confidence interval (CI) and corresponding GRADE certainty of evidence (N = 22 RCTs).

|                 |                      |                |                     |                     |                                    |               |
|-----------------|----------------------|----------------|---------------------|---------------------|------------------------------------|---------------|
| <b>Minimal</b>  |                      |                |                     |                     |                                    |               |
| -39, -54 to -19 | <b>Mediterranean</b> |                |                     |                     |                                    |               |
| -17, -34 to 4   | 11, -17 to 45        | <b>Low fat</b> |                     |                     |                                    |               |
| -1, -30 to 40   | 31, -9 to 95         | 20, -21 to 80  | <b>Very low fat</b> |                     |                                    |               |
| 8, -21 to 49    | 40, -2 to 109        | 31, -14 to 94  | 9, -31 to 73        | <b>Modified fat</b> |                                    |               |
| 5, -36 to 70    | 44, -1 to 121        | 26, -26 to 109 | 6, -42 to 90        | -3, -47 to 74       | <b>Combined low fat-low sodium</b> |               |
| 38, -67 to 380  | 77, -29 to 429       | 66, -63 to 442 | 39, -68 to 394      | 28, -70 to 365      | -24, -81 to 230                    | <b>Ornish</b> |

Table S66. Absolute estimates for stroke prevention at last follow-up (intermediate baseline risk). Named dietary programmes network meta-analysis results as risk differences (RD) per 1000 over 5 years with 95% confidence interval (CI) and corresponding GRADE certainty of evidence (N = 20 RCTs).

|                |                      |                |                     |                     |                                    |                 |
|----------------|----------------------|----------------|---------------------|---------------------|------------------------------------|-----------------|
| <b>Minimal</b> |                      |                |                     |                     |                                    |                 |
| -7, -11 to -1  | <b>Mediterranean</b> |                |                     |                     |                                    |                 |
| 0, -5 to 6     | 7, 2 to 14           | <b>Low fat</b> |                     |                     |                                    |                 |
| -1, -7 to 9    | 7, -2 to 21          | 0, -8 to 12    | <b>Very low fat</b> |                     |                                    |                 |
| 13, -9 to 74   | 21, -3 to 88         | 14, -9 to 78   | 15, -10 to 84       | <b>Modified fat</b> |                                    |                 |
| -8, -14 to 5   | 0, -8 to 15          | -7, -14 to 7   | -7, -15 to 9        | -13, -19 to 8       | <b>Combined low fat-low sodium</b> |                 |
| 30, -19 to 561 | 37, -12 to 572       | 30, -19 to 561 | 31, -19 to 575      | 10, -20 to 479      | 56, -18 to 681                     | <b>Pritikin</b> |

Table S67. Absolute estimates for stroke prevention at last follow-up (high baseline risk). Named dietary programmes network meta-analysis results as risk differences (RD) per 1000 over 5 years with 95% confidence interval (CI) and corresponding GRADE certainty of evidence (N = 20 RCTs).

|                |                      |                |                     |                     |                                    |                 |
|----------------|----------------------|----------------|---------------------|---------------------|------------------------------------|-----------------|
| <b>Minimal</b> |                      |                |                     |                     |                                    |                 |
| -16, -25 to -3 | <b>Mediterranean</b> |                |                     |                     |                                    |                 |
| 0, -12 to 13   | 16, 4 to 30          | <b>Low fat</b> |                     |                     |                                    |                 |
| -1, -16 to 20  | 15, -4 to 45         | -1, -18 to 26  | <b>Very low fat</b> |                     |                                    |                 |
| 29, -21 to 151 | 45, -6 to 177        | 30, -21 to 158 | 32, -21 to 168      | <b>Modified fat</b> |                                    |                 |
| -17, -32 to 11 | -1, -17 to 32        | -17, -33 to 14 | -16, -33 to 19      | -29, -42 to 17      | <b>Combined low fat-low sodium</b> |                 |
| 63, -43 to 718 | 80, -27 to 735       | 64, -43 to 718 | 66, -43 to 728      | 22, -45 to 653      | 117, -41 to 799                    | <b>Pritikin</b> |

Table S68. Absolute estimates for non-fatal myocardial infarction (MI) prevention at last follow-up (intermediate baseline risk). Named dietary programmes network meta-analysis results as risk differences (RD) per 1000 over 5 years with 95% confidence interval (CI) and corresponding GRADE certainty of evidence (N = 27 RCTs).

|                 |                      |                |                     |                     |                                    |
|-----------------|----------------------|----------------|---------------------|---------------------|------------------------------------|
| <b>Minimal</b>  |                      |                |                     |                     |                                    |
| -17, -21 to -11 | <b>Mediterranean</b> |                |                     |                     |                                    |
| -7, -13 to -1   | 6, -0 to 16          | <b>Low fat</b> |                     |                     |                                    |
| 6, -4 to 20     | 23, 10 to 41         | 14, 2 to 30    | <b>Very low fat</b> |                     |                                    |
| -4, -13 to 11   | 12, -1 to 33         | 4, -7 to 21    | -9, -20 to 10       | <b>Modified fat</b> |                                    |
| 21, -2 to 59    | 34, 12 to 73         | 26, 4 to 63    | 10, -10 to 44       | 24, -4 to 73        | <b>Combined low fat-low sodium</b> |

Table S69. Absolute estimates for non-fatal myocardial infarction (MI) prevention at last follow-up (high baseline risk). Named dietary programmes network meta-analysis results as risk differences (RD) per 1000 over 5 years with 95% confidence interval (CI) and corresponding GRADE certainty of evidence (N = 27 RCTs).

|                 |                      |                |                     |                     |                                         |
|-----------------|----------------------|----------------|---------------------|---------------------|-----------------------------------------|
| <b>Minimal</b>  |                      |                |                     |                     |                                         |
| -42, -53 to -28 | <b>Mediterranean</b> |                |                     |                     |                                         |
| -18, -31 to -3  | 16, -1 to 39         | <b>Low fat</b> |                     |                     |                                         |
| 15, -11 to 48   | 57, 26 to 100        | 33, 5 to 71    | <b>Very low fat</b> |                     |                                         |
| -9, -32 to 26   | 29, -2 to 79         | 10, -17 to 51  | -20, -46 to 21      | <b>Modified fat</b> |                                         |
| 42, -7 to 116   | 84, 30 to 169        | 61, 9 to 141   | 24, -24 to 101      | 56, -9 to 159       | <b>Combined low fat-<br/>low sodium</b> |

Table S70. Absolute estimates for unplanned cardiovascular intervention prevention at last follow-up (intermediate baseline risk). Named dietary programmes network meta-analysis results as risk differences (RD) per 1000 over 5 years with 95% confidence interval (CI) and corresponding GRADE certainty of evidence (N = 18 RCTs).

|                |                      |                |                     |                                    |               |
|----------------|----------------------|----------------|---------------------|------------------------------------|---------------|
| <b>Minimal</b> |                      |                |                     |                                    |               |
| -1, -12 to 16  | <b>Mediterranean</b> |                |                     |                                    |               |
| -13, -20 to -2 | -12, -21 to 4        | <b>Low fat</b> |                     |                                    |               |
| -2, -14 to 19  | -0, -16 to 29        | 20, -5 to 64   | <b>Very low fat</b> |                                    |               |
| 10, -12 to 59  | 19, -11 to 90        | 39, -1 to 125  | 12, -14 to 79       | <b>Combined low fat-low sodium</b> |               |
| -2, -22 to 60  | 4, -21 to 87         | 13, -19 to 117 | -1, -23 to 75       | -10, -26 to 56                     | <b>Ornish</b> |

Table S71. Absolute estimates for unplanned cardiovascular intervention prevention at last follow-up (high baseline risk). Named dietary programmes network meta-analysis results as risk differences (RD) per 1000 over 5 years with 95% confidence interval (CI) and corresponding GRADE certainty of evidence (N = 18 RCTs).

|                  |                      |                |                     |                                    |               |
|------------------|----------------------|----------------|---------------------|------------------------------------|---------------|
| <b>Minimal</b>   |                      |                |                     |                                    |               |
| -4, -51 to 62    | <b>Mediterranean</b> |                |                     |                                    |               |
| -57, -89 to -9   | -54, -95 to 18       | <b>Low fat</b> |                     |                                    |               |
| -6, -61 to 74    | -1, -68 to 108       | 76, -19 to 212 | <b>Very low fat</b> |                                    |               |
| 41, -54 to 199   | 75, -47 to 276       | 140, -5 to 350 | 49, -63 to 250      | <b>Combined low fat-low sodium</b> |               |
|                  |                      |                |                     | -42, -120 to 191                   | <b>Ornish</b> |
| -10, -101 to 202 | 16, -97 to 271       | 52, -83 to 333 | -4, -104 to 242     |                                    |               |

Table S72. GRADE assessment for all-cause mortality (at 12 months of follow-up) in named dietary programme network.

| Comparison groups |               | Direct evidence |                 |             |                     |     |               |              |                  | Indirect evidence                 |                      |                                           |                                   |                | Network evidence                    |                      |                      |                                                            |             |                        |                 |                                     |                             |                                          |                                  |
|-------------------|---------------|-----------------|-----------------|-------------|---------------------|-----|---------------|--------------|------------------|-----------------------------------|----------------------|-------------------------------------------|-----------------------------------|----------------|-------------------------------------|----------------------|----------------------|------------------------------------------------------------|-------------|------------------------|-----------------|-------------------------------------|-----------------------------|------------------------------------------|----------------------------------|
| Arm 1             | Arm 2 (Ref)   | No. of study    | No. of patients | I-square, % | OR (95%CrI)         | RoB | Inconsistency | Indirectness | Publication bias | Direct rating without imprecision | OR (95%CrI)          | First order loop of the most contribution | Lowest certainty evidence in loop | Intransitivity | Indirect rating without imprecision | OR (95%CrI)          | Incoherence, P-value | Dominant rating of direct and indirect without imprecision | Incoherence | RD (intermediate risk) | RD (high risk)  | NMA Imprecision (intermediate risk) | NMA Imprecision (high risk) | Final network rating (intermediate risk) | Final network rating (high risk) |
| Mediterranean     | Minimal       | 2               | 333             | 0           | 0.80 (0.23, 2.77)   | -1  | 0             | -1           | 0                | Low                               | 0.46 (0.22, 0.95)    | Mediterranean-Low fat-Minimal             | Moderate                          | 0              | Moderate                            | 0.53 (0.28, 0.99)    | 0.446                | Moderate                                                   | 0           | -3, -10 to 22          | -6, -23 to 49   | -1                                  | -1                          | Low                                      | Low                              |
| Low fat           | Minimal       | 3               | 2221            | 0           | 0.92 (0.59, 1.46)   | 0   | 0             | -1           | 0                | Moderate                          | 1.62 (0.41, 6.35)    | Low fat-Mediterranean-Minimal             | Low                               | 0              | Low                                 | 0.98 (0.64, 1.50)    | 0.446                | Moderate                                                   | 0           | 0, -5 to 6             | -1, -11 to 14   | 0                                   | -1                          | Moderate                                 | Low                              |
| Very low fat      | Minimal       | 2               | 413             | 0           | 2.44 (0.35, 16.90)  | -1  | 0             | 0            | 0                | Moderate                          | n/a                  | n/a                                       | n/a                               | n/a            | n/a                                 | 2.44 (0.35, 16.90)   |                      | Moderate                                                   | 0           | 18, -8 to 169          | 40, -19 to 313  | 0                                   | -1                          | Moderate                                 | Low                              |
| Modified fat      | Minimal       | 1               | 80              | 0           | 7.10 (0.38, 131.06) | -1  | 0             | 0            | 0                | Moderate                          | n/a                  | n/a                                       | n/a                               | n/a            | n/a                                 | 7.10 (0.38, 131.06)  |                      | Moderate                                                   | 0           | 73, -8 to 620          | 150, -18 to 772 | 0                                   | -1                          | Moderate                                 | Low                              |
| Ornish            | Minimal       | 2               | 232             | 0           | 2.43 (0.24, 24.17)  | -1  | 0             | 0            | 0                | Moderate                          | n/a                  | n/a                                       | n/a                               | n/a            | n/a                                 | 2.43 (0.24, 24.17)   |                      | Moderate                                                   | 0           | 18, -10 to 228         | 40, -23 to 397  | -1                                  | -1                          | Low                                      | Low                              |
| Pritikin          | Minimal       |                 |                 |             |                     |     |               |              |                  |                                   | 0.25 (0.01, 6.64)    | Pritikin-Low fat-Minimal                  | Moderate                          | 0              | Moderate                            | 0.25 (0.01, 6.64)    |                      | Moderate                                                   | 0           | -10, -13 to 67         | -22, -30 to 140 | -2                                  | -2                          | Very low                                 | Very low                         |
| Low fat           | Mediterranean | 1               | 406             | 0           | 2.0 (1.14, 3.57)    | -1  | 0             | 0            | 0                | Moderate                          | 1.15 (0.31, 4.32)    | Low fat-Minimal-Mediterranean             | Low                               | -1             | Very low                            | 1.85 (1.09, 3.13)    | 0.446                | Moderate                                                   | 0           | 2, -9 to 41            | 4, -21 to 88    | -1                                  | -1                          | Low                                      | Very low                         |
| Very low fat      | Mediterranean |                 |                 |             |                     |     |               |              |                  |                                   | 4.61 (0.60, 35.30)   | Very low fat-Minimal-Mediterranean        | Low                               | -1             | Very low                            | 4.61 (0.60, 35.30)   |                      | Very low                                                   | 0           | 44, -5 to 304          | 95, -12 to 492  | -1                                  | -2                          | Very low                                 | Very low                         |
| Modified fat      | Mediterranean |                 |                 |             |                     |     |               |              |                  |                                   | 13.42 (0.68, 264.94) | Mod fat-Minimal-Mediterranean             | Low                               | -1             | Very low                            | 13.42 (0.68, 264.94) |                      | Very low                                                   | 0           | 137, -4 to 764         | 185, -19 to 837 | -1                                  | -2                          | Very low                                 | Very low                         |
| Ornish            | Mediterranean |                 |                 |             |                     |     |               |              |                  |                                   | 4.59 (0.42, 49.71)   | Ornish-Minimal-Mediterranean              | Low                               | -1             | Very low                            | 4.59 (0.42, 49.71)   |                      | Very low                                                   | 0           | 25, -10 to 339         | 94, -17 to 576  | -2                                  | -2                          | Very low                                 | Very low                         |
| Pritikin          | Mediterranean |                 |                 |             |                     |     |               |              |                  |                                   | 0.47 (0.02, 12.73)   | Pritikin-Low fat-Mediterranean            | Moderate                          | 0              | Moderate                            | 0.47 (0.02, 12.73)   |                      | Moderate                                                   | 0           | -7, -13 to 130         | -16, -29 to 252 | -2                                  | -2                          | Very low                                 | Very low                         |
| Very low fat      | Low fat       |                 |                 |             |                     |     |               |              |                  |                                   | 2.49 (0.34, 18.13)   | Very low fat-Minimal-Low fat              | Moderate                          | 0              | Moderate                            | 2.49 (0.34, 18.13)   |                      | Moderate                                                   | 0           | 19, -9 to 180          | 42, -20 to 329  | -1                                  | -2                          | Low                                      | Very low                         |
| Modified fat      | Low fat       |                 |                 |             |                     |     |               |              |                  |                                   | 7.27 (0.38, 138.38)  | Mod fat-Minimal-Low fat                   | Moderate                          | -1             | Low                                 | 7.27 (0.38, 138.38)  |                      | Low                                                        | 0           | 74, -8 to 633          | 154, -18 to 781 | -1                                  | -2                          | Very low                                 | Very low                         |
| Ornish            | Low fat       |                 |                 |             |                     |     |               |              |                  |                                   | 2.48 (0.24, 25.73)   | Ornish-Minimal-Low fat                    | Moderate                          | -1             | Low                                 | 2.48 (0.24, 25.73)   |                      | Low                                                        | 0           | 19, -10 to 240         | 41, -23 to 413  | -2                                  | -2                          | Very low                                 | Very low                         |
| Pritikin          | Low fat       | 1               | 45              | 0           | 0.25 (0.01, 6.60)   | -1  | 0             | 0            | 0                | Moderate                          | n/a                  | n/a                                       | n/a                               | n/a            | n/a                                 | 0.25 (0.01, 6.60)    |                      | Moderate                                                   | 0           | -10, -13 to 67         | -22, -30 to 140 | -2                                  | -2                          | Very low                                 | Very low                         |
| Modified fat      | Very low fat  |                 |                 |             |                     |     |               |              |                  |                                   | 2.91 (0.09, 96.52)   | Mod fat-Minimal-Very low fat              | Moderate                          | -1             | Low                                 | 2.91 (0.09, 96.52)   |                      | Low                                                        | 0           | 24, -12 to 547         | 53, -27 to 719  | -2                                  | -2                          | Very low                                 | Very low                         |
| Ornish            | Very low fat  |                 |                 |             |                     |     |               |              |                  |                                   | 1.00 (0.05, 20.12)   | Ornish-Minimal-Very low fat               | Moderate                          | -1             | Low                                 | 1.00 (0.05, 20.12)   |                      | Low                                                        | 0           | 0, -12 to 196          | 0, 28 to 353    | -2                                  | -2                          | Very low                                 | Very low                         |
| Pritikin          | Very low fat  |                 |                 |             |                     |     |               |              |                  |                                   | 0.10 (0.00, 4.62)    | Pritikin-Low fat-Minimal-Very low fat     | Moderate                          | -1             | Low                                 | 0.10 (0.00, 4.62)    |                      | Low                                                        | 0           | -12, -13 to 44         | -27, -30 to 95  | -2                                  | -2                          | Very low                                 | Very low                         |
| Ornish            | Modified fat  |                 |                 |             |                     |     |               |              |                  |                                   | 0.34 (0.01, 13.99)   | Ornish-Minimal-Mod fat                    | Moderate                          | -1             | Low                                 | 0.34 (0.01, 13.99)   |                      | Low                                                        | 0           | -9, -13 to 143         | -20, -30 to 272 | -2                                  | -2                          | Very low                                 | Very low                         |
| Pritikin          | Modified fat  |                 |                 |             |                     |     |               |              |                  |                                   | 0.04 (0.00, 2.83)    | Pritikin-Low fat-Minimal-Mod fat          | Moderate                          | -1             | Low                                 | 0.04 (0.00, 2.83)    |                      | Low                                                        | 0           | -12, -13 to 23         | -29, -30 to 50  | -2                                  | -2                          | Very low                                 | Very low                         |
| Pritikin          | Ornish        |                 |                 |             |                     |     |               |              |                  |                                   | 0.10 (0.00, 5.64)    | Pritikin-Low fat-Minimal-Ornish           | Moderate                          | -1             | Low                                 | 0.10 (0.00, 5.64)    |                      | Low                                                        | 0           | -12, -13 to 56         | -27, -30 to 119 | -2                                  | -2                          | Very low                                 | Very low                         |

Table S73. GRADE assessment for all-cause mortality (at last follow-up) in named dietary programme network.

| Comparison groups |                  | Direct evidence |                 |                        |             |     |               |              |                  | Indirect evidence                 |                   |                                                     |                                      |                | Network evidence                    |                   |                      |                                                            |             |                        |                   |                                     |                             |                                          |                                  |
|-------------------|------------------|-----------------|-----------------|------------------------|-------------|-----|---------------|--------------|------------------|-----------------------------------|-------------------|-----------------------------------------------------|--------------------------------------|----------------|-------------------------------------|-------------------|----------------------|------------------------------------------------------------|-------------|------------------------|-------------------|-------------------------------------|-----------------------------|------------------------------------------|----------------------------------|
| Arm 1             | Arm 2 (Ref)      | No. of study    | No. of patients | I-square, %            | OR (95%CrI) | RoB | Inconsistency | Indirectness | Publication bias | Direct rating without imprecision | OR (95%CrI)       | First order loop of the most contribution           | Lowest certainty of evidence in loop | Intransitivity | Indirect rating without imprecision | OR (95%CrI)       | Incoherence, P-value | Dominant rating of direct and indirect without imprecision | Incoherence | RD (intermediate risk) | RD (high risk)    | NMA Imprecision (intermediate risk) | NMA Imprecision (high risk) | Final network rating (intermediate risk) | Final network rating (high risk) |
| Mediterranean     | Minimal          | 7               | 4730            | 0.74 (0.54, 1.02)      | 0           | 0   | -1            | 0            | 0                | Moderate                          | 0.67 (0.46, 0.97) | Med-low fat and low fat-minimal                     | Low                                  | 0              | Low                                 | 0.72 (0.56, 0.92) | 0.682                | Moderate                                                   | 0           | -17, -26 to -5         | -36, -58 to -10   | 0                                   | 0                           | Moderate                                 | Moderate                         |
| Low fat           | Minimal          | 12              | 12144           | 8.4 0.83 (0.72, 0.95)  | 0           | 0   | -1            | 0            | 0                | Moderate                          | 0.91 (0.60, 1.37) | Med-low fat and Med-minimal                         | Low                                  | 0              | Low                                 | 0.84 (0.74, 0.95) | 0.687                | Moderate                                                   | 0           | -9, -15 to -3          | -20, -33 to -6    | 0                                   | 0                           | Moderate                                 | Moderate                         |
| Very low fat      | Minimal          | 4               | 2321            | 0.96 (0.78, 1.17)      | 0           | 0   | 0             | 0            | 0                | High                              | n/a               | n/a                                                 | n/a                                  | n/a            | n/a                                 | 1.05 (0.80, 1.38) | Moderate             | High                                                       | 0           | -3, -14 to 10          | -6, -29 to 22     | -1                                  | -1                          | Moderate                                 | Moderate                         |
| Modified fat      | Minimal          | 4               | 1343            | 45.9 1.10 (0.73, 1.66) | -1          | 0   | 0             | 0            | 0                | Moderate                          | n/a               | n/a                                                 | n/a                                  | n/a            | n/a                                 | 1.05 (0.80, 1.38) | Moderate             | Moderate                                                   | 0           | 9, -12 to 22           | 6, -26 to 44      | -1                                  | -1                          | Low                                      | Low                              |
| Low fat & sodium  | Minimal          | 3               | 5355            | 0.101 (0.81, 1.26)     | 0           | 0   | 0             | 0            | 0                | High                              | 1.21 (0.39, 3.74) | LowFat&Na-low fat; low fat-minimal                  | Moderate                             | 0              | Moderate                            | 1.02 (0.84, 1.27) | 0.754                | High                                                       | 0           | 1, -11 to 15           | -2, 23 to 32      | -1                                  | -1                          | Moderate                                 | Moderate                         |
| Ornish            | Minimal          | 2               | 232             | 0.243 (0.24, 24.17)    | -1          | 0   | 0             | 0            | 0                | Moderate                          | n/a               | n/a                                                 | n/a                                  | n/a            | n/a                                 | 2.43 (0.24, 24.2) | Moderate             | Moderate                                                   | 0           | 76, -46 to 553         | 145, -104 to 659  | -1                                  | -1                          | Low                                      | Low                              |
| Pritikin          | Minimal          |                 |                 |                        |             |     |               |              |                  |                                   | 0.21 (0.01, 5.56) | prtkin - low fat; low fat minimal                   | Moderate                             | 0              | Moderate                            | 0.21 (0.01, 5.56) | Moderate             | Moderate                                                   | 0           | -48, -61 to 207        | -109, -141 to 338 | -2                                  | -2                          | Very low                                 | Very low                         |
| Low fat           | Mediterranean    | 3               | 8853            | 60.1 1.39 (0.90, 2.13) | -1          | -1  | 0             | 0            | 0                | Low                               | 1.11 (0.77, 1.62) | Low fat-minimal and minimal-Med                     | Moderate                             | -1             | Low                                 | 1.17 (0.94, 1.45) | 0.686                | Low                                                        | 0           | 7, -3 to 19            | 3, -14 to 23      | -1                                  | -1                          | Very low                                 | Very low                         |
| Very low fat      | Mediterranean    |                 |                 |                        |             |     |               |              |                  |                                   | 1.33 (0.98, 1.80) | very low fat - min; min - med                       | Moderate                             | -1             | Low                                 | 1.33 (0.98, 1.80) | Low                  | Low                                                        | 0           | 9, -5 to 24            | 16, -10 to 52     | -1                                  | -1                          | Very low                                 | Very low                         |
| Modified fat      | Mediterranean    |                 |                 |                        |             |     |               |              |                  |                                   | 1.46 (0.99, 2.16) | mod fat - min; min - med                            | Moderate                             | -1             | Low                                 | 1.46 (0.99, 2.16) | Low                  | Low                                                        | 0           | 0.19, -0.0 to 47       | 42, -1 to 99      | -1                                  | -1                          | Very low                                 | Very low                         |
| Low fat & sodium  | Mediterranean    |                 |                 |                        |             |     |               |              |                  |                                   | 1.42 (1.02, 1.98) | LowFat&Na - low fat; low fat - med                  | Low                                  | 0              | Low                                 | 1.42 (1.02, 1.98) | Low                  | Low                                                        | 0           | 13, -2 to 29           | 27, -5 to 67      | -1                                  | -1                          | Very low                                 | Very low                         |
| Ornish            | Mediterranean    |                 |                 |                        |             |     |               |              |                  |                                   | 3.39 (0.34, 34.2) | ornish - min; min - med                             | Moderate                             | -1             | Low                                 | 3.39 (0.34, 34.2) | Low                  | Low                                                        | 0           | 93, -29 to 572         | 182, -68 to 697   | -2                                  | -2                          | Very low                                 | Very low                         |
| Pritikin          | Mediterranean    |                 |                 |                        |             |     |               |              |                  |                                   | 0.30 (0.01, 7.79) | prtkin-low fat; low fat-med                         | Low                                  | 0              | Low                                 | 0.30 (0.01, 7.79) | Low                  | Low                                                        | 0           | -31, -45 to 224        | -72, -106 to 376  | -2                                  | -2                          | Very low                                 | Very low                         |
| Very low fat      | Low fat          |                 |                 |                        |             |     |               |              |                  |                                   | 1.14 (0.89, 1.45) | very low fat - min; min - low fat                   | Moderate                             | 0              | Moderate                            | 1.14 (0.89, 1.45) | Moderate             | Moderate                                                   | 0           | 7, -6 to 22            | 15, -12 to 46     | -1                                  | -1                          | Very low                                 | Very low                         |
| Modified fat      | Low fat          |                 |                 |                        |             |     |               |              |                  |                                   | 1.25 (0.92, 1.70) | mod fat - min; min - low fat                        | Moderate                             | -1             | Low                                 | 1.25 (0.92, 1.70) | Low                  | Low                                                        | 0           | 0.12, -4 to 34         | 26, 9 to 70       | -1                                  | -1                          | Very low                                 | Very low                         |
| Low fat & sodium  | Low fat          | 1               | 294             | 0.128 (0.69, 2.38)     | 0           | 0   | 0             | 0            | 0                | High                              | 1.20 (0.91, 1.59) | LowFat&Na - min; min - low fat                      | Moderate                             | 0              | Moderate                            | 1.21 (0.95, 1.55) | 0.872                | Moderate                                                   | 0           | 10, -3 to 27           | 22, -5 to 56      | -1                                  | -1                          | Low                                      | Low                              |
| Ornish            | Low fat          |                 |                 |                        |             |     |               |              |                  |                                   | 2.89 (0.29, 28.9) | Ornish - minimal; minimal - low fat                 | Moderate                             | -1             | Low                                 | 2.89 (0.29, 28.9) | Low                  | Low                                                        | 0           | 86, -37 to 565         | 165, -84 to 679   | -2                                  | -2                          | Very low                                 | Very low                         |
| Pritikin          | Low fat          | 1               | 45              | 0.025 (0.01, 6.60)     | 0           | 0   | 0             | 0            | 0                | High                              | n/a               | n/a                                                 | n/a                                  | n/a            | n/a                                 | 0.25 (0.01, 6.61) | High                 | High                                                       | 0           | -39, -52 to 217        | -89, -122 to 358  | -2                                  | -2                          | Low                                      | Low                              |
| Modified fat      | Very low fat     |                 |                 |                        |             |     |               |              |                  |                                   | 1.10 (0.77, 1.57) | mod fat - min; min - very low fat                   | Moderate                             | -1             | Low                                 | 1.10 (0.77, 1.57) | Low                  | Low                                                        | 0           | 6, -14 to 32           | 12, -29 to 65     | -2                                  | -2                          | Very low                                 | Very low                         |
| Low fat & sodium  | Very low fat     |                 |                 |                        |             |     |               |              |                  |                                   | 1.07 (0.78, 1.45) | LowFat&Na - min; min - very low fat                 | High                                 | 0              | High                                | 1.07 (0.78, 1.45) | High                 | High                                                       | 0           | 4, -13 to 25           | 8, -28 to 52      | -2                                  | -2                          | Low                                      | Low                              |
| Ornish            | Very low fat     |                 |                 |                        |             |     |               |              |                  |                                   | 2.55 (0.25, 25.6) | ornish - min; min - very low fat                    | Moderate                             | -1             | Low                                 | 2.55 (0.25, 25.6) | Low                  | Low                                                        | 0           | 82, -46 to 567         | 155, -103 to 667  | -2                                  | -2                          | Very low                                 | Very low                         |
| Pritikin          | Very low fat     |                 |                 |                        |             |     |               |              |                  |                                   | 0.22 (0.01, 5.87) | prtkin - low fat; low fat - min; min - very low fat | Moderate                             | -1             | Low                                 | 0.22 (0.01, 5.87) | Low                  | Low                                                        | 0           | -48, -61 to 218        | -108, -141 to 352 | -2                                  | -2                          | Very low                                 | Very low                         |
| Low fat & sodium  | Modified fat     |                 |                 |                        |             |     |               |              |                  |                                   | 0.97 (0.68, 1.38) | LowFat&Na - min; min - mod fat                      | Moderate                             | -1             | Low                                 | 0.97 (0.68, 1.38) | Low                  | Low                                                        | 0           | -2, -19 to 22          | -4, -41 to 44     | -2                                  | -2                          | Very low                                 | Very low                         |
| Ornish            | Modified fat     |                 |                 |                        |             |     |               |              |                  |                                   | 2.32 (0.23, 23.4) | Ornish - min; min - mod fat                         | Moderate                             | -1             | Low                                 | 2.32 (0.23, 23.4) | Low                  | Low                                                        | 0           | 71, -47 to 545         | 136, -106 to 633  | -2                                  | -2                          | Very low                                 | Very low                         |
| Pritikin          | Modified fat     |                 |                 |                        |             |     |               |              |                  |                                   | 0.20 (0.01, 5.37) | prtkin - low fat; low fat - min; min - mod fat      | Moderate                             | -1             | Low                                 | 0.20 (0.01, 5.37) | Low                  | Low                                                        | 0           | -49, -61 to 200        | -111, -141 to 350 | -2                                  | -2                          | Very low                                 | Very low                         |
| Low fat & sodium  | Low fat & sodium |                 |                 |                        |             |     |               |              |                  |                                   | 2.39 (0.24, 24.0) | Ornish - min; min - LowFat&Na                       | Moderate                             | -1             | Low                                 | 2.39 (0.24, 24.0) | Low                  | Low                                                        | 0           | 74, -46 to 551         | 142, -104 to 657  | -2                                  | -2                          | Very low                                 | Very low                         |
| Pritikin          | Low fat & sodium |                 |                 |                        |             |     |               |              |                  |                                   | 0.21 (0.01, 5.51) | prtkin - low fat; low fat - LowFat&Na               | High                                 | 0              | High                                | 0.21 (0.01, 5.51) | High                 | High                                                       | 0           | -48, -61 to 205        | -109, -141 to 356 | -2                                  | -2                          | Low                                      | Low                              |
| Ornish            | Ornish           |                 |                 |                        |             |     |               |              |                  |                                   | 0.09 (0.00, 4.75) | prtkin - low fat; low fat - min; min - ornish       | Moderate                             | -1             | Low                                 | 0.09 (0.00, 4.75) | Low                  | Low                                                        | 0           | -56, -62 to 177        | -128, -143 to 239 | -2                                  | -2                          | Very low                                 | Very low                         |

Table S74. GRADE assessment for cardiovascular mortality (at last follow-up) in named dietary programme network.

| Comparison groups |               | Direct evidence |                 |                          |             |     |               |              |                  | Indirect evidence                 |                     |                                           |                                      |                | Network evidence                    |                   |                      |                                                            |             |                        |                 |                                     |                             |                                          |                                  |
|-------------------|---------------|-----------------|-----------------|--------------------------|-------------|-----|---------------|--------------|------------------|-----------------------------------|---------------------|-------------------------------------------|--------------------------------------|----------------|-------------------------------------|-------------------|----------------------|------------------------------------------------------------|-------------|------------------------|-----------------|-------------------------------------|-----------------------------|------------------------------------------|----------------------------------|
| Arm 1             | Arm 2 (Ref)   | No. of study    | No. of patients | I-square, %              | OR (95%CrI) | RoB | Inconsistency | Indirectness | Publication bias | Direct rating without imprecision | OR (95%CrI)         | First order loop of the most contribution | Lowest certainty of evidence in loop | Intransitivity | Indirect rating without imprecision | OR (95%CrI)       | Incoherence, P-value | Dominant rating of direct and indirect without imprecision | Incoherence | RD (intermediate risk) | RD (high risk)  | NMA Imprecision (intermediate risk) | NMA Imprecision (high risk) | Final network rating (intermediate risk) | Final network rating (high risk) |
| Mediterranean     | Minimal       | 6               | 4603            | 0.61 (0.39 to 0.94)      | 0           | 0   | -1            | 0            | -1               | Moderate                          | 0.51 (0.30 to 0.85) | med - low fat; low fat - min              | Low                                  | 0              | Low                                 | 0.55 (0.39, 0.78) | 0.673                | Moderate                                                   | 0           | -13, -17 to -6         | -39, -54 to -19 | 0                                   | 0                           | Moderate                                 | Moderate                         |
| Low fat           | Minimal       | 8               | 10740           | 49.9 0.76 (0.57 to 1.02) | 0           | -1  | -1            | 0            | 0                | Low                               | 0.90 (0.47 to 1.73) | low fat - med; med - min                  | Moderate                             | 0              | Moderate                            | 0.80 (0.61, 1.05) | 0.673                | Low                                                        | 0           | -6, -11 to 1           | -17, -34 to 4   | -1                                  | -1                          | Very low                                 | Very low                         |
| Very low fat      | Minimal       | 4               | 2321            | 0.98 (0.75 to 1.27)      | 0           | 0   | 0             | 0            | 0                | High                              | n/a                 | n/a                                       | n/a                                  | n/a            | n/a                                 | 0.99 (0.65, 1.50) | High                 | High                                                       | n/a         | 0, -10 to 14           | -1, -30 to 40   | -1                                  | -1                          | Moderate                                 | Moderate                         |
| Modified fat      | Minimal       | 4               | 1343            | 59.1 1.16 (0.71 to 1.90) | -1          | -1  | 0             | 0            | 0                | Low                               | n/a                 | n/a                                       | n/a                                  | n/a            | n/a                                 | 1.10 (0.75, 1.62) | Low                  | Low                                                        | n/a         | 3, -7 to 17            | 8, -21 to 49    | 0                                   | 0                           | Low                                      | Low                              |
| Low fat & sodium  | Minimal       | 2               | 5061            | 65.9 0.49 (0.05 to 5.28) | 0           | -1  | 0             | 0            | 0                | Moderate                          | n/a                 | n/a                                       | n/a                                  | n/a            | n/a                                 | 1.06 (0.59, 1.91) | Moderate             | Moderate                                                   | n/a         | 2, -12 to 25           | 5, -36 to 70    | -1                                  | -1                          | Low                                      | Low                              |
| Ornish            | Minimal       | 2               | 76              | 0.148 (0.25 to 8.63)     | -1          | 0   | 0             | 0            | 0                | Moderate                          | n/a                 | n/a                                       | n/a                                  | n/a            | n/a                                 | 1.48 (0.25, 8.81) | Moderate             | Moderate                                                   | n/a         | 13, -22 to 179         | 38, -67 to 380  | -1                                  | -1                          | Low                                      | Low                              |
| Low fat           | Mediterranean | 3               | 8853            | 17.5 1.51 (1.09 to 2.08) | -1          | 0   | 0             | 0            | 0                | Moderate                          | 1.30 (0.71 to 2.37) | low fat - min; min - med                  | Low                                  | -1             | Very low                            | 1.45 (1.06, 1.99) | 0.673                | Moderate                                                   | 0           | 3, -5 to 15            | 11, -17 to 45   | -1                                  | -1                          | Very low                                 | Very low                         |
| Very low fat      | Mediterranean |                 |                 |                          |             |     |               |              |                  |                                   | 1.80 (1.04, 3.11)   | very low fat - min; min - med             | Moderate                             | -1             | Very low                            | 1.80 (1.04, 3.11) | Low                  | Low                                                        | n/a         | 10, -3 to 32           | 31, -9 to 95    | -1                                  | -1                          | Very low                                 | Very low                         |
| Modified fat      | Mediterranean |                 |                 |                          |             |     |               |              |                  |                                   | 2.01 (1.18, 3.43)   | mod fat - min; min - med                  | Low                                  | -1             | Very low                            | 2.01 (1.18, 3.43) | Very low             | Very low                                                   | n/a         | 13, -1 to 37           | 40, -2 to 109   | -1                                  | -1                          | Very low                                 | Very low                         |
| Low fat & sodium  | Mediterranean |                 |                 |                          |             |     |               |              |                  |                                   | 1.92 (0.98, 3.77)   | LowFat&Na - min; min - med                | Moderate                             | -1             | Low                                 | 1.92 (0.98, 3.77) | Low                  | Low                                                        | n/a         | 14, 0 to 42            | 44, -1 to 121   | -1                                  | -1                          | Very low                                 | Very low                         |
| Ornish            | Mediterranean |                 |                 |                          |             |     |               |              |                  |                                   | 2.68 (0.44, 16.6)   | Ornish - min; min - med                   | Moderate                             | -1             | Low                                 | 2.68 (0.44, 16.6) | Low                  | Low                                                        | n/a         | 29, -10 to 215         | 77, -29 to 429  | -2                                  | -2                          | Very low                                 | Very low                         |
| Very low fat      | Low fat       |                 |                 |                          |             |     |               |              |                  |                                   | 1.24 (0.75, 2.05)   | Very low - min; min - low                 | Low                                  | 0              | Low                                 | 1.24 (0.75, 2.05) | Low                  | Low                                                        | n/a         | 7, -7 to 29            | 20, -21 to 80   | -1                                  | -1                          | Very low                                 | Very low                         |
| Modified fat      | Low fat       |                 |                 |                          |             |     |               |              |                  |                                   | 1.38 (0.84, 2.26)   | mod - min; min - low                      | Low                                  | -1             | Very low                            | 1.38 (0.84, 2.26) | Very low             | Very low                                                   | n/a         | 11, -5 to 34           | 31, -14 to 94   | -1                                  | -1                          | Very low                                 | Very low                         |
| Low fat & sodium  | Low fat       |                 |                 |                          |             |     |               |              |                  |                                   | 1.32 (0.70, 2.48)   | LowFat&Na - min; min - low                | Low                                  | 0              | Low                                 | 1.32 (0.70, 2.48) | Low                  | Low                                                        | n/a         | 9, 9 to 40             | 26, -26 to 109  | -1                                  | -1                          | Very low                                 | Very low                         |
| Ornish            | Low fat       |                 |                 |                          |             |     |               |              |                  |                                   | 1.85 (0.30, 11.3)   | Ornish - min; min - low                   | Low                                  | -1             | Very low                            | 1.85 (0.30, 11.3) | Very low             | Very low                                                   | n/a         | 23, -20 to 223         | 66, -63 to 442  | -2                                  | -2                          | Very low                                 | Very low                         |
| Modified fat      | Very low fat  |                 |                 |                          |             |     |               |              |                  |                                   | 1.11 (0.64, 1.95)   | Mod - min; min - very low                 | Low                                  | -1             | Very low                            | 1.11 (0.64, 1.95) | Very low             | Very low                                                   | n/a         | 3, -10 to 26           | 9, -31 to 73    | -2                                  | -2                          | Very low                                 | Very low                         |
| Low fat & sodium  | Very low fat  |                 |                 |                          |             |     |               |              |                  |                                   | 1.07 (0.52, 2.20)   | LowFat&Na - min; min - very low           | Moderate                             | 0              | Moderate                            | 1.07 (0.52, 2.20) | Moderate             | Moderate                                                   | n/a         | 2, -14 to 33           | 6, -42 to 90    | -2                                  | -2                          | Very low                                 | Very low                         |
| Ornish            | Very low fat  |                 |                 |                          |             |     |               |              |                  |                                   | 1.49 (0.24, 9.32)   | Ornish - min; min - very low              | Moderate                             | -1             | Low                                 | 1.49 (0.24, 9.32) | Low                  | Low                                                        | n/a         | 14, -22 to 189         | 39, -68 to 394  | -2                                  | -2                          | Very low                                 | Very low                         |
| Low fat & sodium  | Modified fat  |                 |                 |                          |             |     |               |              |                  |                                   | 0.96 (0.47, 1.96)   | LowFat&Na - min; min - mod                | Moderate                             | -1             | Low                                 | 0.96 (0.47, 1.96) | Low                  | Low                                                        | n/a         | -1, -15 to 26          | -3, -47 to 74   | -2                                  | -2                          | Very low                                 | Very low                         |
| Ornish            | Modified fat  |                 |                 |                          |             |     |               |              |                  |                                   | 1.34 (0.22, 8.31)   | Ornish - min; min - mod                   |                                      |                |                                     |                   |                      |                                                            |             |                        |                 |                                     |                             |                                          |                                  |



Table S75. GRADE assessment for stroke (at last follow-up) in named dietary programme network.

| Comparison groups |                  | Direct evidence |                 |                      |             |     |               |              |                  | Indirect evidence                 |                                           |                                           |                                      |                | Network evidence                    |             |                      |                                                            |                  |                        |                |                                     |                             |                                          |                                  |
|-------------------|------------------|-----------------|-----------------|----------------------|-------------|-----|---------------|--------------|------------------|-----------------------------------|-------------------------------------------|-------------------------------------------|--------------------------------------|----------------|-------------------------------------|-------------|----------------------|------------------------------------------------------------|------------------|------------------------|----------------|-------------------------------------|-----------------------------|------------------------------------------|----------------------------------|
| Arm 1             | Arm 2 (Ref)      | No. of study    | No. of patients | I-square, %          | OR (95%CrI) | RoB | Inconsistency | Indirectness | Publication bias | Direct rating without imprecision | OR (95%CrI)                               | First order loop of the most contribution | Lowest certainty of evidence in loop | Intransitivity | Indirect rating without imprecision | OR (95%CrI) | Incoherence, P-value | Dominant rating of direct and indirect without imprecision | Incoherence      | RD (intermediate risk) | RD (high risk) | NMA Imprecision (intermediate risk) | NMA Imprecision (high risk) | Final network rating (intermediate risk) | Final network rating (high risk) |
| Mediterranean     | Minimal          | 5               | 4284            | 0.73 (0.39, 1.38)    | 0           | 0   | -1            | 0            | Moderate         | 0.51 (0.17, 1.49)                 | med - low fat; low fat - min              | Moderate                                  | 0                                    | Moderate       | 0.65 (0.46, 0.93)                   | 0.579       | Moderate             | 0                                                          | -7, -11 to -1    | -16, -25 to -3         | 0              | 0                                   | Moderate                    | Moderate                                 |                                  |
| Low fat           | Minimal          | 4               | 6618            | 47.2 (0.69, 1.55)    | 0           | 0   | -1            | 0            | Moderate         | 1.07 (0.50, 2.29)                 | low fat -med; med - min                   | Moderate                                  | 0                                    | Moderate       | 0.99 (0.75, 1.29)                   | 0.809       | Moderate             | 0                                                          | -5 to 6          | 0, -12 to 13           | 0              | 0                                   | Moderate                    | Moderate                                 |                                  |
| Very low fat      | Minimal          | 2               | 1891            | 0.97 (0.65, 1.44)    | 0           | 0   | 0             | 0            | High             | n/a                               | n/a                                       | n/a                                       | n/a                                  | n/a            | 0.97 (0.65, 1.44)                   |             | High                 |                                                            | -1, -7 to 9      | -1, -16 to 20          | 0              | -1                                  | High                        | Moderate                                 |                                  |
| Modified fat      | Minimal          | 2               | 805             | 0.166 (0.056, 4.92)  | -1          | 0   | 0             | 0            | Moderate         | n/a                               | n/a                                       | n/a                                       | n/a                                  | n/a            | 1.66 (0.56, 4.92)                   |             | Moderate             |                                                            | 13, -9 to 74     | 29, -21 to 151         | 0              | -1                                  | Moderate                    | Low                                      |                                  |
| Low fat & sodium  | Minimal          | 1               | 2521            | 0.59 (0.30, 1.18)    | 0           | 0   | 0             | 0            | High             | 3.01 (0.12, 75.4)                 | Lowfat&Na - low fat; low fat - min        | Moderate                                  | 0                                    | Moderate       | 0.63 (0.32, 1.24)                   | 0.332       | High                 | 0                                                          | -8, -14 to 5     | -17, -32 to 11         | 0              | -1                                  | High                        | Moderate                                 |                                  |
| Pritikin          | Minimal          |                 |                 |                      | n/a         | n/a | n/a           | n/a          | n/a              | n/a                               | prtitikin - low ; low - min               | Moderate                                  | 0                                    | Moderate       | 2.48 (0.09, 64.8)                   |             | Moderate             |                                                            | 30, -19 to 561   | 63, -43 to 718         | -1             | -1                                  | Low                         | Low                                      |                                  |
| Low fat           | Mediterranean    | 4               | 8728            | 0.156 (1.14 to 2.13) | -1          | 0   | 0             | 0            | Moderate         | 1.14 (0.40, 3.27)                 | Low fat - min; min - med                  | Moderate                                  | -1                                   | Low            | 1.51 (1.14, 2.01)                   | 0.58        | Moderate             | 0                                                          | 7, 2 to 14       | 16, 4 to 30            | 0              | 0                                   | Moderate                    | Moderate                                 |                                  |
| Very low fat      | Mediterranean    |                 |                 |                      | n/a         | n/a | n/a           | n/a          | n/a              | n/a                               | Very Low fat - min; min - med             | Moderate                                  | -1                                   | Low            | 1.48 (0.87, 2.52)                   |             | Low                  |                                                            | 7, -2 to 21      | 15, -4 to 48           | -1             | -1                                  | Very low                    | Very low                                 |                                  |
| Modified fat      | Mediterranean    |                 |                 |                      | n/a         | n/a | n/a           | n/a          | n/a              | n/a                               | mod -min; min - med                       | Moderate                                  | -1                                   | Low            | 2.54 (0.81, 7.98)                   |             | Low                  |                                                            | 21, -9 to 88     | 45, -6 to 177          | -1             | -1                                  | Very low                    | Very low                                 |                                  |
| Low fat & sodium  | Mediterranean    |                 |                 |                      | n/a         | n/a | n/a           | n/a          | n/a              | n/a                               | Lowfat&Na - min; Min - med                | Moderate                                  | -1                                   | Low            | 0.97 (0.45, 2.08)                   |             | Low                  |                                                            | 0, -8 to 15      | -1, -17 to 32          | -1             | -2                                  | Very low                    | Very low                                 |                                  |
| Pritikin          | Mediterranean    |                 |                 |                      | n/a         | n/a | n/a           | n/a          | n/a              | n/a                               | Pritikin - low; Low - med                 | Moderate                                  | 0                                    | Moderate       | 3.80 (0.14, 99.5)                   |             | Moderate             |                                                            | 37, -12 to 572   | 80, -27 to 735         | -1             | -2                                  | Low                         | Very low                                 |                                  |
| Very low fat      | Low fat          |                 |                 |                      | n/a         | n/a | n/a           | n/a          | n/a              | n/a                               | very low - min; min - low                 | Moderate                                  | 0                                    | Moderate       | 0.98 (0.61, 1.58)                   |             | Moderate             |                                                            | 0, -8 to 12      | -1, -18 to 26          | 0              | -2                                  | Moderate                    | Very low                                 |                                  |
| Modified fat      | Low fat          |                 |                 |                      | n/a         | n/a | n/a           | n/a          | n/a              | n/a                               | Mod - min; min - low                      | Moderate                                  | -1                                   | Low            | 1.68 (0.55, 5.15)                   |             | Low                  |                                                            | 14, -9 to 78     | 30, -21 to 158         | -1             | -2                                  | Very low                    | Very low                                 |                                  |
| Low fat & sodium  | Low fat          | 1               | 294             | 0.303 (0.12 to 100)  | 0           | 0   | 0             | 0            | High             | 0.59 (0.28, 1.24)                 | Lowfat&Na - min; min - low                | Moderate                                  | 0                                    | Moderate       | 0.64 (0.31, 1.32)                   | 0.332       | Moderate             | 0                                                          | -7, -14 to 7     | -17, -33 to 14         | 0              | -1                                  | Moderate                    | Low                                      |                                  |
| Pritikin          | Low fat          | 1               | 45              | 0.251 (0.10, 64.99)  | 0           | 0   | 0             | 0            | High             | 0.705 (6.17E-29, 8.06E27)         | n/a                                       | n/a                                       | n/a                                  | n/a            | 2.51 (0.10, 65.0)                   |             | High                 |                                                            | 0.30, -19 to 561 | 64, -43 to 718         | -2             | -2                                  | Low                         | Low                                      |                                  |
| Modified fat      | Very low fat     |                 |                 |                      | n/a         | n/a | n/a           | n/a          | n/a              | n/a                               | Mod - min; min - very low                 | Moderate                                  | -1                                   | Low            | 1.72 (0.54, 5.46)                   |             | Low                  |                                                            | 15, -10 to 84    | 32, -21 to 168         | -1             | -2                                  | Very low                    | Very low                                 |                                  |
| Low fat & sodium  | Very low fat     |                 |                 |                      | n/a         | n/a | n/a           | n/a          | n/a              | n/a                               | Lowfat&Na - min; min - very low           | High                                      | 0                                    | High           | 0.66 (0.30, 1.43)                   |             | High                 |                                                            | -7, -15 to 9     | -16, -33 to 19         | -1             | -2                                  | Moderate                    | Low                                      |                                  |
| Pritikin          | Very low fat     |                 |                 |                      | n/a         | n/a | n/a           | n/a          | n/a              | n/a                               | Pritikin - low; low - min; min - very low | Moderate                                  | -1                                   | Low            | 2.56 (0.10, 68.7)                   |             | Low                  |                                                            | 31, -19 to 575   | 66, -43 to 728         | -2             | -2                                  | Very low                    | Very low                                 |                                  |
| Low fat & sodium  | Modified fat     |                 |                 |                      | n/a         | n/a | n/a           | n/a          | n/a              | n/a                               | Lowfat&Na - min; min - Mod                | Moderate                                  | -1                                   | Low            | 0.38 (0.11, 1.37)                   |             | Low                  |                                                            | -13, -19 to 8    | -29, -42 to 17         | -1             | -2                                  | Very low                    | Very low                                 |                                  |
| Pritikin          | Modified fat     |                 |                 |                      | n/a         | n/a | n/a           | n/a          | n/a              | n/a                               | Pritikin - low; low - min; min - mod      | Moderate                                  | -1                                   | Low            | 1.49 (0.05, 46.6)                   |             | Low                  |                                                            | 10, -20 to 479   | 22, -45 to 653         | -2             | -2                                  | Very low                    | Very low                                 |                                  |
| Pritikin          | Low fat & sodium |                 |                 |                      | n/a         | n/a | n/a           | n/a          | n/a              | n/a                               | Pritikin - low; low - Lowfat&Na           | High                                      | 0                                    | High           | 3.91 (0.14, 110)                    |             | High                 |                                                            | 56, -18 to 681   | 117, -41 to 799        | -2             | -2                                  | Low                         | Low                                      |                                  |

Table S76. GRADE assessment for non-fatal myocardial infarction (at last follow-up) in named dietary programme network.

| Comparison groups |               | Direct evidence |                 |                         |             |     |               |              |                  | Indirect evidence                 |                                 |                                           |                                      |                | Network evidence                    |             |                      |                                                            |                 |                        |                |                                     |                             |                                          |                                  |
|-------------------|---------------|-----------------|-----------------|-------------------------|-------------|-----|---------------|--------------|------------------|-----------------------------------|---------------------------------|-------------------------------------------|--------------------------------------|----------------|-------------------------------------|-------------|----------------------|------------------------------------------------------------|-----------------|------------------------|----------------|-------------------------------------|-----------------------------|------------------------------------------|----------------------------------|
| Arm 1             | Arm 2 (Ref)   | No. of study    | No. of patients | I-square, %             | OR (95%CrI) | RoB | Inconsistency | Indirectness | Publication bias | Direct rating without imprecision | OR (95%CrI)                     | First order loop of the most contribution | Lowest certainty of evidence in loop | Intransitivity | Indirect rating without imprecision | OR (95%CrI) | Incoherence, P-value | Dominant rating of direct and indirect without imprecision | Incoherence     | RD (intermediate risk) | RD (high risk) | NMA Imprecision (intermediate risk) | NMA Imprecision (high risk) | Final network rating (intermediate risk) | Final network rating (high risk) |
| Mediterranean     | Minimal       | 5               | 4284            | 0.46 (0.31, 0.70)       | 0           | 0   | -1            | 0            | Moderate         | 0.49 (0.32, 0.75)                 | med - low; low - min            | Moderate                                  | 0                                    | Moderate       | 0.48 (0.36, 0.65)                   | 0.84        | Moderate             | 0                                                          | -17, -21 to -11 | -42, -53 to -28        | 0              | 0                                   | Moderate                    | Moderate                                 |                                  |
| Low fat           | Minimal       | 7               | 9514            | 0.79 (0.66, 0.95)       | 0           | 0   | -1            | 0            | Moderate         | 0.76 (0.45, 1.29)                 | Low-med; med-min                | Moderate                                  | 0                                    | Moderate       | 0.77 (0.61, 0.96)                   | 0.984       | Moderate             | 0                                                          | -7, -13 to -1   | -18, -31 to -3         | 0              | 0                                   | Moderate                    | Moderate                                 |                                  |
| Very low fat      | Minimal       | 5               | 2556            | 38.3 (1.05, 1.70)       | -1          | 0   | 0             | 0            | Moderate         | n/a                               | n/a                             | n/a                                       | n/a                                  | n/a            | 1.19 (0.86, 1.65)                   |             | Moderate             |                                                            | 0.6, -4 to 20   | 15, -11 to 48          | 0              | 0                                   | Moderate                    | Moderate                                 |                                  |
| Modified fat      | Minimal       | 3               | 885             | 0.089 (0.60, 1.31)      | -1          | 0   | 0             | 0            | Moderate         | n/a                               | n/a                             | n/a                                       | n/a                                  | n/a            | 0.89 (0.60, 1.31)                   |             | Moderate             |                                                            | -0, -13 to 11   | -9, -32 to 26          | 0              | -1                                  | Moderate                    | Low                                      |                                  |
| Low fat & sodium  | Minimal       | 1               | 2521            | 0.166 (0.97, 2.85)      | 0           | 0   | 0             | 0            | High             | 0.76 (0.10, 5.60)                 | Lowfat&Na - low; low - Min      | Moderate                                  | 0                                    | Moderate       | 1.57 (0.91, 2.71)                   | 0.459       | High                 | 0                                                          | 0.21, -2 to 59  | 42, -7 to 116          | 0              | 0                                   | High                        | High                                     |                                  |
| Low fat           | Mediterranean | 4               | 8955            | 30.3 (1.59, 1.12, 2.27) | -1          | 0   | 0             | 0            | Moderate         | 1.67 (1.00, 2.76)                 | low-min; min - med              | Moderate                                  | -1                                   | Low            | 1.59 (1.24, 2.04)                   | 0.84        | Moderate             | 0                                                          | 0.6, -0 to 16   | 16, -1 to 39           | 0              | -1                                  | Moderate                    | Low                                      |                                  |
| Very low fat      | Mediterranean |                 |                 |                         | n/a         | n/a | n/a           | n/a          | n/a              | n/a                               | very low - min; min - med       | Moderate                                  | -1                                   | Low            | 2.47 (1.64, 3.71)                   |             | Low                  |                                                            | 0.23, 10 to 41  | 57, 26 to 100          | 0              | 0                                   | Low                         | Low                                      |                                  |
| Modified fat      | Mediterranean |                 |                 |                         | n/a         | n/a | n/a           | n/a          | n/a              | n/a                               | mod -min; min - med             | Moderate                                  | -1                                   | Low            | 1.85 (1.11, 3.08)                   |             | Low                  |                                                            | 0.12, -1 to 33  | 29, -2 to 79           | -1             | -1                                  | Very low                    | Very low                                 |                                  |
| Low fat & sodium  | Mediterranean |                 |                 |                         | n/a         | n/a | n/a           | n/a          | n/a              | n/a                               | Lowfat&Na - low; low - med      | Moderate                                  | 0                                    | Moderate       | 3.25 (1.76, 6.00)                   |             | Moderate             |                                                            | 0.34, 12 to 73  | 84, 30 to 169          | 0              | 0                                   | Moderate                    | Moderate                                 |                                  |
| Very low fat      | Low fat       |                 |                 |                         | n/a         | n/a | n/a           | n/a          | n/a              | n/a                               | Very low - min; min - low       | Moderate                                  | -1                                   | Low            | 1.55 (1.08, 2.23)                   |             | Moderate             |                                                            | 0.14, 2 to 30   | 33, 5 to 71            | 0              | 0                                   | Moderate                    | Moderate                                 |                                  |
| Modified fat      | Low fat       |                 |                 |                         | n/a         | n/a | n/a           | n/a          | n/a              | n/a                               | Mod - min; min - low            | Moderate                                  | -1                                   | Low            | 1.16 (0.79, 1.86)                   |             | Low                  |                                                            | 0.4, -7 to 21   | 10, 37 to 51           | -1             | -1                                  | Very low                    | Very low                                 |                                  |
| Low fat & sodium  | Low fat       | 1               | 294             | 0.100 (0.14, 7.14)      | 0           | 0   | 0             | 0            | High             | 2.19 (1.18, 4.07)                 | Lowfat&Na - min; min - low      | Moderate                                  | 0                                    | Moderate       | 2.05 (1.15, 3.65)                   | 0.459       | Moderate             | 0                                                          | 0.26, 4 to 63   | 61, 9 to 141           | 0              | 0                                   | Moderate                    | Moderate                                 |                                  |
| Modified fat      | Very low fat  |                 |                 |                         | n/a         | n/a | n/a           | n/a          | n/a              | n/a                               | Mod - min; min - very low       | Moderate                                  | -1                                   | Low            | 0.75 (0.44, 1.27)                   |             | Low                  |                                                            | -0.9, -20 to 10 | -20, -46 to 21         | -1             | -2                                  | Very low                    | Very low                                 |                                  |
| Low fat & sodium  | Very low fat  |                 |                 |                         | n/a         | n/a | n/a           | n/a          | n/a              | n/a                               | Lowfat&Na - min; min - very low | Moderate                                  | 0                                    | Moderate       | 1.32 (0.70, 2.46)                   |             | Moderate             |                                                            | 0.10, -10 to 44 | 24, -24 to 101         | -1             | -1                                  | Low                         | Very low                                 |                                  |
| Low fat & sodium  | Modified fat  |                 |                 |                         | n/a         | n/a | n/a           | n/a          | n/a              | n/a                               | Lowfat&Na - min; min - mod      | Moderate                                  | -1                                   | Low            | 1.76 (0.89, 3.47)                   |             | Low                  |                                                            | 0.24, -4 to 73  | 56, -9 to 159          | -1             | -1                                  | Very low                    | Very low                                 |                                  |

Table S77. GRADE assessment for unplanned cardiovascular interventions (at last follow-up) in named dietary programme network.

| Comparison groups |                  | Direct evidence |                 |             |                   |     |               |              |                  | Indirect evidence                 |                   |                                                          |                                                          |                                      | Network evidence |                                     |                   |                      |                                                            |             |                        |                  |                                     |                             |                                          |                                  |
|-------------------|------------------|-----------------|-----------------|-------------|-------------------|-----|---------------|--------------|------------------|-----------------------------------|-------------------|----------------------------------------------------------|----------------------------------------------------------|--------------------------------------|------------------|-------------------------------------|-------------------|----------------------|------------------------------------------------------------|-------------|------------------------|------------------|-------------------------------------|-----------------------------|------------------------------------------|----------------------------------|
| Arm 1             | Arm 2 (Ref)      | No. of study    | No. of patients | I-square, % | OR (95%CrI)       | RoB | Inconsistency | Indirectness | Publication bias | Direct rating without imprecision | OR (95%CrI)       | First order loop of the most contribution: comparison #1 | First order loop of the most contribution: comparison #2 | Lowest certainty of evidence in loop | Intransitivity   | Indirect rating without imprecision | OR (95%CrI)       | Incoherence, P-value | Dominant rating of direct and indirect without imprecision | Incoherence | RD (intermediate risk) | RD (high risk)   | NMA Imprecision (intermediate risk) | NMA Imprecision (high risk) | Final network rating (intermediate risk) | Final network rating (high risk) |
| Mediterranean     | Minimal          | 4               | 4153            | 0           | 0.90 (0.74, 1.08) | 0   | 0             | -1           | 0                | Moderate                          | 0.38 (0.13, 1.12) | Low fat-Min                                              | Low fat-Med                                              | Low                                  | 0                | Low                                 | 0.97 (0.61, 1.54) | 0.127                | Moderate                                                   | 0           | -1, -12 to 16          | -4, -51 to 62    | 0                                   | -1                          | Moderate                                 | Low                              |
| Low fat           | Minimal          | 7               | 7535            | 65.9        | 0.51 (0.31, 0.84) | 0   | -1            | -1           | 0                | Low                               | 1.41 (0.47, 4.2)  | Med-Min                                                  | Low fat-Med                                              | Low                                  | 0                | Low                                 | 0.57 (0.35, 0.93) | 0.126                | Low                                                        | 0           | -13, -20 to -2         | -57, -89 to -9   | 0                                   | 0                           | Low                                      | Low                              |
| Very low fat      | Minimal          | 3               | 2069            | 62          | 0.96 (0.57, 1.61) | 0   | -1            | 0            | 0                | Moderate                          |                   |                                                          |                                                          |                                      |                  |                                     | 0.95 (0.54, 1.65) |                      | Moderate                                                   | 0           | -2, -14 to 19          | -6, -61 to 74    | 0                                   | -1                          | Moderate                                 | Low                              |
| Low fat & sodium  | Minimal          | 1               | 2521            | 0           | 1.35 (0.97, 1.88) | 0   | 0             | 0            | 0                | High                              |                   |                                                          |                                                          |                                      |                  |                                     | 1.35 (0.59, 3.09) |                      | High                                                       | 0           | 10, -12 to 59          | 41, -54 to 199   | 0                                   | -1                          | High                                     | Moderate                         |
| Ornish            | Minimal          | 1               | 204             | 0           | 0.92 (0.35, 2.41) | -1  | 0             | 0            | 0                | Moderate                          |                   |                                                          |                                                          |                                      |                  |                                     | 0.92 (0.27, 3.14) |                      | Moderate                                                   | 0           | -2, -22 to 60          | -10, -101 to 202 | -1                                  | -1                          | Low                                      | Low                              |
| Low fat           | Mediterranean    | 2               | 1101            | 75.1        | 1.35 (0.34, 5.26) | -1  | -1            | 0            | 0                | Low                               | 0.51 (0.21, 1.23) | Med-Min                                                  | Low fat-Min                                              | Low                                  | -1               | very low                            | 0.59 (0.31, 1.15) | 0.126                | very low                                                   | 0           | -12, -21 to 4          | -54, -95 to 18   | -1                                  | -1                          | Very low                                 | Very low                         |
| Very low fat      | Mediterranean    |                 |                 |             |                   |     |               |              |                  |                                   | 1.17 (0.57, 2.40) | Med-Min                                                  | Very low fat-Min                                         | Moderate                             | -1               | Low                                 | 0.99 (0.49, 2.00) |                      | Low                                                        | 0           | -0, -16 to 29          | -1, -68 to 108   | -1                                  | -2                          | Very low                                 | Very low                         |
| Low fat & sodium  | Mediterranean    |                 |                 |             |                   |     |               |              |                  |                                   | 1.66 (0.64, 4.29) | Med-Min                                                  | Low fat&Na-Min                                           | Moderate                             | -1               | Low                                 | 1.66 (0.64, 4.29) |                      | Low                                                        | 0           | 19, -11 to 90          | 75, -47 to 276   | -1                                  | -2                          | Very low                                 | Very low                         |
| Ornish            | Mediterranean    |                 |                 |             |                   |     |               |              |                  |                                   | 1.13 (0.30, 4.20) | Med-Min                                                  | Ornish-Min                                               | Moderate                             | -1               | Low                                 | 1.13 (0.30, 4.20) |                      | Low                                                        | 0           | 4, -21 to 87           | 16, -97 to 271   | -2                                  | -2                          | Very low                                 | Very low                         |
| Very low fat      | Low fat          |                 |                 |             |                   |     |               |              |                  |                                   | 1.50 (0.74, 3.02) | Low fat-Min                                              | Very low fat-Min                                         | Low                                  | 0                | Low                                 | 1.67 (0.85, 3.27) |                      | Low                                                        | 0           | 20, -5 to 64           | 76, -19 to 212   | -1                                  | -1                          | Very low                                 | Very low                         |
| Low fat & sodium  | Low fat          |                 |                 |             |                   |     |               |              |                  |                                   | 2.13 (0.82, 5.53) | Low fat-Min                                              | Low fat&Na-Min                                           | Low                                  | 0                | Low                                 | 2.35 (0.96, 5.78) |                      | Low                                                        | 0           | 39, -1 to 125          | 140, -5 to 350   | -1                                  | -1                          | Very low                                 | Very low                         |
| Ornish            | Low fat          |                 |                 |             |                   |     |               |              |                  |                                   | 1.45 (0.39, 5.41) | Low fat-Min                                              | Ornish-Min                                               | Low                                  | -1               | very low                            | 1.45 (0.39, 5.41) |                      | very low                                                   | 0           | 13, -19 to 117         | 52, -83 to 333   | -1                                  | -2                          | Very low                                 | Very low                         |
| Low fat & sodium  | Very low fat     |                 |                 |             |                   |     |               |              |                  |                                   | 1.42 (0.53, 3.85) | Very low fat-Min                                         | Low fat&Na-Min                                           | Moderate                             | 0                | Moderate                            | 1.42 (0.53, 3.85) |                      | Moderate                                                   | 0           | 12, -14 to 79          | 49, -63 to 250   | -1                                  | -2                          | Low                                      | Very low                         |
| Ornish            | Very low fat     |                 |                 |             |                   |     |               |              |                  |                                   | 0.97 (0.25, 3.72) | Very low fat-Min                                         | Ornish-Min                                               | Moderate                             | -1               | Low                                 | 0.97 (0.25, 3.72) |                      | Low                                                        | 0           | -1, -23 to 75          | -4, -104 to 242  | -2                                  | -2                          | Very low                                 | Very low                         |
| Ornish            | Low fat & sodium |                 |                 |             |                   |     |               |              |                  |                                   | 0.68 (0.15, 2.99) | Low fat&Na-Min                                           | Ornish-Min                                               | Moderate                             | -1               | Low                                 | 0.68 (0.15, 2.99) |                      | Low                                                        | 0           | -10, -26 to 56         | -42, -120 to 191 | -2                                  | -2                          | Very low                                 | Very low                         |

## References

- 1 Cholesterol Treatment Trialists' (CTT) Collaborators, Mihaylova B, Emberson J, *et al.* The effects of lowering LDL cholesterol with statin therapy in people at low risk of vascular disease: meta-analysis of individual data from 27 randomised trials. *Lancet* 2012;**380**:581–90. doi:10.1016/S0140-6736(12)60367-5
- 2 Arnett DK, Blumenthal RS, Albert MA, *et al.* 2019 ACC/AHA Guideline on the Primary Prevention of Cardiovascular Disease. *J Am Coll Cardiol* 2019;**74**:e177–232. doi:10.1016/j.jacc.2019.03.010
- 3 Rapsomaniki E, Shah A, Perel P, *et al.* Prognostic models for stable coronary artery disease based on electronic health record cohort of 102 023 patients. *Eur Heart J* 2014;**35**:844–52. doi:10.1093/eurheartj/ehf533
- 4 Ge L, Sadeghirad B, Ball GDC, *et al.* Comparison of dietary macronutrient patterns of 14 popular named dietary programmes for weight and cardiovascular risk factor reduction in adults: systematic review and network meta-analysis of randomised trials. *BMJ* 2020;**369**:m696. doi:10.1136/bmj.m696
- 5 Page MJ, Higgins JPT, Clayton G, *et al.* Empirical evidence of study design biases in randomized trials: systematic review of meta-epidemiological studies. *PLOS ONE* 2016;**11**:e0159267. doi:10.1371/journal.pone.0159267
- 6 Harbord RM, Egger M, Sterne JAC. A modified test for small-study effects in meta-analyses of controlled trials with binary endpoints. *Stat Med* 2006;**25**:3443–57. doi:10.1002/sim.2380
- 7 Johnston BC, Zeraatkar D, Han MA, *et al.* Unprocessed Red Meat and Processed Meat Consumption: Dietary Guideline Recommendations From the Nutritional Recommendations (NutriRECS) Consortium. *Ann Intern Med* 2019;**171**:756–64. doi:10.7326/M19-1621
- 8 Whelton PK, Appel LJ, Espeland MA, *et al.* Sodium reduction and weight loss in the treatment of hypertension in older persons: a randomized controlled trial of nonpharmacologic interventions in the elderly (TONE). TONE Collaborative Research Group. *JAMA* 1998;**279**:839–46. doi:10.1001/jama.279.11.839
- 9 Shea MK, Nicklas BJ, Houston DK, *et al.* The effect of intentional weight loss on all-cause mortality in older adults: results of a randomized controlled weight-loss trial. *Am J Clin Nutr* 2011;**94**:839–46. doi:10.3945/ajcn.110.006379
- 10 Zwisler A-DO, Schou L, Soja AMB, *et al.* A randomized clinical trial of hospital-based, comprehensive cardiac rehabilitation versus usual care for patients with congestive heart failure, ischemic heart disease, or high risk of ischemic heart disease (the DANREHAB trial)--design, intervention, and population. *Am Heart J* 2005;**150**:899. doi:10.1016/j.ahj.2005.06.010
- 11 Zwisler A-DO, Soja AMB, Rasmussen S, *et al.* Hospital-based comprehensive cardiac rehabilitation versus usual care among patients with congestive heart failure, ischemic heart disease, or high risk of ischemic heart disease: 12-month results of a randomized clinical trial. *Am Heart J* 2008;**155**:1106–13. doi:10.1016/j.ahj.2007.12.033

- 12 Look AHEAD Research Group, Wing RR, Bolin P, *et al.* Cardiovascular effects of intensive lifestyle intervention in type 2 diabetes. *N Engl J Med* 2013;**369**:145–54. doi:10.1056/NEJMoa1212914
- 13 Look AHEAD Research Group. Eight-year weight losses with an intensive lifestyle intervention: the look AHEAD study. *Obesity (Silver Spring)* 2014;**22**:5–13. doi:10.1002/oby.20662
- 14 Burr ML, Fehily AM, Gilbert JF, *et al.* Effects of changes in fat, fish, and fibre intakes on death and myocardial reinfarction: diet and reinfarction trial (DART). *Lancet* 1989;**2**:757–61. doi:10.1016/s0140-6736(89)90828-3
- 15 Burr ML, Fehily AM, Rogers S, *et al.* Diet and reinfarction trial (DART): design, recruitment, and compliance. *Eur Heart J* 1989;**10**:558–67. doi:10.1093/oxfordjournals.eurheartj.a059528
- 16 Fehily AM, Vaughan-Williams E, Shiels K, *et al.* The effect of dietary advice on nutrient intakes: evidence from the diet and reinfarction trial (DART). *J Hum Nutr Diet* 1989;**2**:225–35. doi:https://doi.org/10.1111/j.1365-277X.1989.tb00026.x
- 17 Watts GF, Lewis B, Brunt JN, *et al.* Effects on coronary artery disease of lipid-lowering diet, or diet plus cholestyramine, in the St Thomas' Atherosclerosis Regression Study (STARS). *Lancet* 1992;**339**:563–9. doi:10.1016/0140-6736(92)90863-x
- 18 Gaede P, Vedel P, Larsen N, *et al.* Multifactorial intervention and cardiovascular disease in patients with type 2 diabetes. *N Engl J Med* 2003;**348**:383–93. doi:10.1056/NEJMoa021778
- 19 Gaede P, Lund-Andersen H, Parving H-H, *et al.* Effect of a multifactorial intervention on mortality in type 2 diabetes. *N Engl J Med* 2008;**358**:580–91. doi:10.1056/NEJMoa0706245
- 20 Lisspers J, Sundin O, Hofman-Bang C, *et al.* Behavioral effects of a comprehensive, multifactorial program for lifestyle change after percutaneous transluminal coronary angioplasty: a prospective, randomized controlled study. *J Psychosom Res* 1999;**46**:143–54. doi:10.1016/s0022-3999(98)00074-9
- 21 Lisspers J, Sundin O, Ohman A, *et al.* Long-term effects of lifestyle behavior change in coronary artery disease: effects on recurrent coronary events after percutaneous coronary intervention. *Health Psychol* 2005;**24**:41–8. doi:10.1037/0278-6133.24.1.41
- 22 Hofman-Bang C, Lisspers J, Nordlander R, *et al.* Two-year results of a controlled study of residential rehabilitation for patients treated with percutaneous transluminal coronary angioplasty. A randomized study of a multifactorial programme. *Eur Heart J* 1999;**20**:1465–74. doi:10.1053/euhj.1999.1544
- 23 Vestfold Heartcare Study Group. Influence on lifestyle measures and five-year coronary risk by a comprehensive lifestyle intervention programme in patients with coronary heart disease. *Eur J Cardiovasc Prev Rehabil* 2003;**10**:429–37. doi:10.1097/01.hjr.0000107024.38316.6a
- 24 Cupples ME, McKnight A. Randomised controlled trial of health promotion in general practice for patients at high cardiovascular risk. *BMJ* 1994;**309**:993–6. doi:10.1136/bmj.309.6960.993

- 25 Cupples ME, McKnight A. Five year follow up of patients at high cardiovascular risk who took part in randomised controlled trial of health promotion. *BMJ* 1999;**319**:687–8. doi:10.1136/bmj.319.7211.687
- 26 Greaves C, Gillison F, Stathi A, *et al.* Waste the waist: a pilot randomised controlled trial of a primary care based intervention to support lifestyle change in people with high cardiovascular risk. *Int J Behav Nutr Phys Act* 2015;**12**:1. doi:10.1186/s12966-014-0159-z
- 27 Hjerermann I, Velve Byre K, Holme I, *et al.* Effect of diet and smoking intervention on the incidence of coronary heart disease. Report from the Oslo Study Group of a randomised trial in healthy men. *Lancet* 1981;**2**:1303–10. doi:10.1016/s0140-6736(81)91338-6
- 28 Hjerkin EM, Sandvik L, Hjerermann I, *et al.* Effect of diet intervention on long-term mortality in healthy middle-aged men with combined hyperlipidaemia. *J Intern Med* 2004;**255**:68–73. doi:10.1046/j.0954-6820.2003.01248.x
- 29 Murchie P, Campbell NC, Ritchie LD, *et al.* Secondary prevention clinics for coronary heart disease: four year follow up of a randomised controlled trial in primary care. *BMJ* 2003;**326**:84. doi:10.1136/bmj.326.7380.84
- 30 Delaney EK, Murchie P, Lee AJ, *et al.* Secondary prevention clinics for coronary heart disease: a 10-year follow-up of a randomised controlled trial in primary care. *Heart* 2008;**94**:1419–23. doi:10.1136/hrt.2007.126144
- 31 Campbell NC, Ritchie LD, Thain J, *et al.* Secondary prevention in coronary heart disease: a randomised trial of nurse led clinics in primary care. *Heart* 1998;**80**:447–52. doi:10.1136/hrt.80.5.447
- 32 Haskell WL, Alderman EL, Fair JM, *et al.* Effects of intensive multiple risk factor reduction on coronary atherosclerosis and clinical cardiac events in men and women with coronary artery disease. The Stanford Coronary Risk Intervention Project (SCRIP). *Circulation* 1994;**89**:975–90. doi:10.1161/01.cir.89.3.975
- 33 Howard BV, Van Horn L, Hsia J, *et al.* Low-fat dietary pattern and risk of cardiovascular disease: the Women’s Health Initiative Randomized Controlled Dietary Modification Trial. *JAMA* 2006;**295**:655–66. doi:10.1001/jama.295.6.655
- 34 Prentice RL, Aragaki AK, Van Horn L, *et al.* Low-fat dietary pattern and cardiovascular disease: results from the Women’s Health Initiative randomized controlled trial. *Am J Clin Nutr* 2017;**106**:35–43. doi:10.3945/ajcn.117.153270
- 35 Prentice RL, Aragaki AK, Howard BV, *et al.* Low-fat dietary pattern among postmenopausal women influences long-term cancer, cardiovascular disease, and diabetes outcomes. *J Nutr* 2019;**149**:1565–74. doi:10.1093/jn/nxz107
- 36 The Women’s Health Initiative Study Group. Design of the Women’s Health Initiative clinical trial and observational study. *Control Clin Trials* 1998;**19**:61–109. doi:10.1016/s0197-2456(97)00078-0

- 37 Ball K, Hanington E, McAllen P, *et al.* Low-fat diet in myocardial infarction: A controlled trial. *Lancet* 1965;**2**:501–4.
- 38 Wallner S, Watzinger N, Lindschinger M, *et al.* Effects of intensified lifestyle modification on the need for further revascularization after coronary angioplasty. *Eur J Clin Invest* 1999;**29**:372–9. doi:10.1046/j.1365-2362.1999.00456.x
- 39 Moy TF, Yanek LR, Raqueño JV, *et al.* Dietary counseling for high blood cholesterol in families at risk of coronary disease. *Prev Cardiol* 2001;**4**:158–64. doi:10.1111/j.1520-037x.2001.00543.x
- 40 Schuler G, Hambrecht R, Schlierf G, *et al.* Regular physical exercise and low-fat diet. Effects on progression of coronary artery disease. *Circulation* 1992;**86**:1–11. doi:10.1161/01.cir.86.1.1
- 41 Marburger C, Hambrecht R, Niebauer J, *et al.* Association between lipoprotein(a) and progression of coronary artery disease in middle-aged men. *Am J Cardiol* 1994;**73**:742–6. doi:10.1016/0002-9149(94)90874-5
- 42 Weber B, Bersch-Ferreira ÂC, Torreglosa CR, *et al.* The Brazilian Cardioprotective Nutritional Program to reduce events and risk factors in secondary prevention for cardiovascular disease: study protocol (The BALANCE Program Trial). *Am Heart J* 2016;**171**:73-81.e1-2. doi:10.1016/j.ahj.2015.08.010
- 43 Weber B, Bersch-Ferreira ÂC, Torreglosa CR, *et al.* Implementation of a Brazilian Cardioprotective Nutritional (BALANCE) Program for improvement on quality of diet and secondary prevention of cardiovascular events: A randomized, multicenter trial. *Am Heart J* 2019;**215**:187–97. doi:10.1016/j.ahj.2019.06.010
- 44 Ueki K, Sasako T, Okazaki Y, *et al.* Effect of an intensified multifactorial intervention on cardiovascular outcomes and mortality in type 2 diabetes (J-DOIT3): an open-label, randomised controlled trial. *Lancet Diabetes Endocrinol* 2017;**5**:951–64. doi:10.1016/S2213-8587(17)30327-3
- 45 Woodhill J, Palmer A, Leelarthapin B, *et al.* Low fat, low cholesterol diet in secondary prevention of coronary heart disease. In: *Drugs, Lipid Metabolism, and Atherosclerosis*. 1978. 317–30.
- 46 Ramsden CE, Zamora D, Leelarthapin B, *et al.* Use of dietary linoleic acid for secondary prevention of coronary heart disease and death: evaluation of recovered data from the Sydney Diet Heart Study and updated meta-analysis. *BMJ* 2013;**346**:e8707. doi:10.1136/bmj.e8707
- 47 Morris J, Ball K, Antonis A, *et al.* Controlled trial of soya-bean oil in myocardial infarction. *Lancet* 1968;**2**:693–9.
- 48 Leren P. The effect of plasma cholesterol lowering diet in male survivors of myocardial infarction. A controlled clinical trial. *Acta Med Scand Suppl* 1966;**466**:1–92.
- 49 Leren P. The Oslo diet-heart study. Eleven-year report. *Circulation* 1970;**42**:935–42. doi:10.1161/01.cir.42.5.935
- 50 Rose GA, Thomson WB, Williams RT. Corn oil in treatment of ischaemic heart disease. *BMJ* 1965;**1**:1531–3. doi:10.1136/bmj.1.5449.1531

- 51 Tuttle KR, Shuler LA, Packard DP, *et al.* Comparison of low-fat versus Mediterranean-style dietary intervention after first myocardial infarction (from The Heart Institute of Spokane Diet Intervention and Evaluation Trial). *Am J Cardiol* 2008;**101**:1523–30. doi:10.1016/j.amjcard.2008.01.038
- 52 Estruch R, Ros E, Salas-Salvadó J, *et al.* Primary prevention of cardiovascular disease with a Mediterranean diet supplemented with extra-virgin olive oil or nuts. *N Engl J Med* 2018;**378**:e34. doi:10.1056/NEJMoa1800389
- 53 Papadaki A, Martínez-González MÁ, Alonso-Gómez A, *et al.* Mediterranean diet and risk of heart failure: results from the PREDIMED randomized controlled trial. *Eur J Heart Fail* 2017;**19**:1179–85. doi:10.1002/ejhf.750
- 54 Ruiz-Canela M, Estruch R, Corella D, *et al.* Association of Mediterranean diet with peripheral artery disease: the PREDIMED randomized trial. *JAMA* 2014;**311**:415–7. doi:10.1001/jama.2013.280618
- 55 Martínez-González MÁ, Toledo E, Arós F, *et al.* Extravirgin olive oil consumption reduces risk of atrial fibrillation: the PREDIMED (Prevención con Dieta Mediterránea) trial. *Circulation* 2014;**130**:18–26. doi:10.1161/CIRCULATIONAHA.113.006921
- 56 Martínez-González MA, Salas-Salvadó J, Estruch R, *et al.* Benefits of the Mediterranean diet: insights from the PREDIMED study. *Prog Cardiovasc Dis* 2015;**58**:50–60. doi:10.1016/j.pcad.2015.04.003
- 57 Lehmann N, Paul A, Moebus S, *et al.* Effects of lifestyle modification on coronary artery calcium progression and prognostic factors in coronary patients--3-year results of the randomized SAFE-LIFE trial. *Atherosclerosis* 2011;**219**:630–6. doi:10.1016/j.atherosclerosis.2011.08.050
- 58 Michalsen A, Grossman P, Lehmann N, *et al.* Psychological and quality-of-life outcomes from a comprehensive stress reduction and lifestyle program in patients with coronary artery disease: results of a randomized trial. *Psychother Psychosom* 2005;**74**:344–52. doi:10.1159/000087781
- 59 Michalsen A, Lehmann N, Pithan C, *et al.* Mediterranean diet has no effect on markers of inflammation and metabolic risk factors in patients with coronary artery disease. *Eur J Clin Nutr* 2006;**60**:478–85. doi:10.1038/sj.ejcn.1602340
- 60 de Lorgeril M, Renaud S, Mamelle N, *et al.* Mediterranean alpha-linolenic acid-rich diet in secondary prevention of coronary heart disease. *Lancet* 1994;**343**:1454–9. doi:10.1016/s0140-6736(94)92580-1
- 61 de Lorgeril M, Salen P, Martin JL, *et al.* Effect of a mediterranean type of diet on the rate of cardiovascular complications in patients with coronary artery disease. Insights into the cardioprotective effect of certain nutriments. *J Am Coll Cardiol* 1996;**28**:1103–8. doi:10.1016/S0735-1097(96)00280-X
- 62 de Lorgeril M, Salen P, Caillat-Vallet E, *et al.* Control of bias in dietary trial to prevent coronary recurrences: The Lyon Diet Heart Study. *Eur J Clin Nutr* 1997;**51**:116–22. doi:10.1038/sj.ejcn.1600374

- 63 de Lorgeril M, Salen P. Mediterranean diet in secondary prevention of coronary heart disease. *Aust J Nutr Diet* 1998;**55**:S16–20.
- 64 de Lorgeril M, Salen P, Martin JL, *et al.* Mediterranean dietary pattern in a randomized trial: prolonged survival and possible reduced cancer rate. *Arch Intern Med* 1998;**158**:1181–7. doi:10.1001/archinte.158.11.1181
- 65 de Lorgeril M, Salen P, Martin JL, *et al.* Mediterranean diet, traditional risk factors, and the rate of cardiovascular complications after myocardial infarction: final report of the Lyon Diet Heart Study. *Circulation* 1999;**99**:779–85. doi:10.1161/01.cir.99.6.779
- 66 Renaud S, de Lorgeril M, Delaye J, *et al.* Cretan Mediterranean diet for prevention of coronary heart disease. *Am J Clin Nutr* 1995;**61**:1360S-1367S. doi:10.1093/ajcn/61.6.1360S
- 67 Giannuzzi P, Temporelli PL, Marchioli R, *et al.* Global secondary prevention strategies to limit event recurrence after myocardial infarction: results of the GOSPEL study, a multicenter, randomized controlled trial from the Italian Cardiac Rehabilitation Network. *Arch Intern Med* 2008;**168**:2194–204. doi:10.1001/archinte.168.20.2194
- 68 Lapetra J, Santos-Lozano J, De la Corte FJ, *et al.* Effect of a Mediterranean diet on the primary prevention of atrial fibrillation and major cardiovascular events in hypertensive patients with high cardiovascular risk: results of ICFAMED study. In: *Obesity and Nutrition in the 21st Century. VIII Symposium Ciber Fisiopatología de la Obesidad y Nutrición*; 2017; Madrid. Madrid: Ciber Fisiopatología de la Obesidad y Nutrición.
- 69 Marcos-Fornioli E, Meco JF, Corbella E, *et al.* Secondary prevention programme of ischaemic heart disease in the elderly: A randomised clinical trial. *Eur J Prev Cardiol* 2018;**25**:278–86. doi:10.1177/2047487317742998
- 70 Matz K, Teuschl Y, Firlinger B, *et al.* Multidomain lifestyle interventions for the prevention of cognitive decline after ischemic stroke: randomized trial. *Stroke* 2015;**46**:2874–80. doi:10.1161/STROKEAHA.115.009992
- 71 Munoz M-A, Vila J, Cabañero M, *et al.* Efficacy of an intensive prevention program in coronary patients in primary care, a randomised clinical trial. *Int J Cardiol* 2007;**118**:312–20. doi:10.1016/j.ijcard.2006.07.015
- 72 Singh RB, Rastogi SS, Verma R, *et al.* Randomised controlled trial of cardioprotective diet in patients with recent acute myocardial infarction: results of one year follow up. *BMJ* 1992;**304**:1015–9. doi:10.1136/bmj.304.6833.1015
- 73 Singh R, Saboo B, Mahashwari A, *et al.* Effects of Indo-Mediterranean style diet and low fat diet on incidence of diabetes in acute coronary syndromes. *World Heart J* 2017;**9**.
- 74 Singh RB, Dubnov G, Niaz MA, *et al.* Effect of an Indo-Mediterranean diet on progression of coronary artery disease in high risk patients (Indo-Mediterranean Diet Heart Study): a randomised single-blind trial. *Lancet* 2002;**360**:1455–61. doi:10.1016/S0140-6736(02)11472-3



- 75 Søndergaard E, Møller JE, Egstrup K. Effect of dietary intervention and lipid-lowering treatment on brachial vasoreactivity in patients with ischemic heart disease and hypercholesterolemia. *Am Heart J* 2003;**145**:903. doi:10.1016/S0002-8703(03)00078-4
- 76 Toobert DJ, Glasgow RE, Nettekoven LA, *et al.* Behavioral and psychosocial effects of intensive lifestyle management for women with coronary heart disease. *Patient Educ Couns* 1998;**35**:177–88. doi:10.1016/s0738-3991(98)00074-3
- 77 Toobert DJ, Glasgow RE, Radcliffe JL. Physiologic and related behavioral outcomes from the Women’s Lifestyle Heart Trial. *Ann Behav Med* 2000;**22**:1–9. doi:10.1007/BF02895162
- 78 Ornish D, Brown SE, Scherwitz LW, *et al.* Can lifestyle changes reverse coronary heart disease? The Lifestyle Heart Trial. *Lancet* 1990;**336**:129–33. doi:10.1016/0140-6736(90)91656-u
- 79 Ornish D, Scherwitz LW, Billings JH, *et al.* Intensive lifestyle changes for reversal of coronary heart disease. *JAMA* 1998;**280**:2001–7. doi:10.1001/jama.280.23.2001
- 80 Pischke CR, Scherwitz L, Weidner G, *et al.* Long-term effects of lifestyle changes on well-being and cardiac variables among coronary heart disease patients. *Health Psychol* 2008;**27**:584–92. doi:10.1037/0278-6133.27.5.584
- 81 Sebrechts EH, Falger PR, Bär FW, *et al.* Cholesterol changes in coronary patients after a short behavior modification program. *Int J Behav Med* 2003;**10**:315–30. doi:10.1207/s15327558ijbm1004\_3
- 82 Hutchison K, Oberle K, Crockford P, *et al.* Effects of dietary manipulation on vascular status of patients with peripheral vascular disease. *JAMA* 1983;**249**:3326–30. doi:10.1001/jama.1983.03330480032026
- 83 Unity Health Toronto. The Effect of an Enhanced Dietary Portfolio Plus Exercise on Cardiovascular Risk in High Risk Individuals. clinicaltrials.gov 2017. <https://clinicaltrials.gov/ct2/show/NCT01954472> (accessed 25 Nov 2021).
- 84 Jimenez FP. Randomized Clinical Trial on the Effects of Mediterranean Diet (Rich on Olive Oil) in the Reduction of Coronary Events of Patients With Coronary Disease. clinicaltrials.gov 2021. <https://clinicaltrials.gov/ct2/show/NCT00924937> (accessed 25 Nov 2021).
- 85 Unity Health Toronto. The First Cross-Canada Trial of the Nutrition Trialists’ Network--Enhanced Dietary Portfolio and Exercise on Arterial Damage (MRI-Enhanced Dietary Portfolio Plus Exercise on Cardiovascular Risk). clinicaltrials.gov 2019. <https://clinicaltrials.gov/ct2/show/NCT02481466> (accessed 25 Nov 2021).
- 86 Fondazione IRCCS Istituto Nazionale dei Tumori, Milano. Randomized Controlled Trial of Metformin and Dietary Restriction to Prevent Age-related Morbid Events in People With Metabolic Syndrome. clinicaltrials.gov 2021. <https://clinicaltrials.gov/ct2/show/NCT02960711> (accessed 25 Nov 2021).
- 87 Barrio T. Randomized Trial of Mediterranean Diet Plus Extravirgin Olive Oil in the Prevention of Recurrent Arrhythmias. The PREDIMAR (PREvención Con Dieta Mediterránea de Arritmias

- Recurrentes) Trial. [clinicaltrials.gov](https://clinicaltrials.gov/ct2/show/NCT03053843) 2020. <https://clinicaltrials.gov/ct2/show/NCT03053843> (accessed 25 Nov 2021).
- 88 Osmercik P. Catheter Ablation vs. Antiarrhythmic Drugs and Risk Factor Modification. PRAGUE-25 Randomized Study. [clinicaltrials.gov](https://clinicaltrials.gov/ct2/show/NCT04011800) 2021. <https://clinicaltrials.gov/ct2/show/NCT04011800> (accessed 25 Nov 2021).
- 89 Tuttolomondo A. Effects of Adherence to a Mediterranean Diet Style on Cardiovascular Risk by Means Its Influence on Serum Levels of Ceramides and on Some Atherothrombotic Candidate Gene Expression. [clinicaltrials.gov](https://clinicaltrials.gov/ct2/show/NCT04873167) 2021. <https://clinicaltrials.gov/ct2/show/NCT04873167> (accessed 25 Nov 2021).
- 90 Estruch R, Ros E, Salas-Salvadó J, *et al.* Primary prevention of cardiovascular disease with a Mediterranean diet. *New Engl J Med* 2013;**368**:1279–90. doi:10.1056/NEJMoa1200303
- 91 Wood DA, Kotseva K, Connolly S, *et al.* Nurse-coordinated multidisciplinary, family-based cardiovascular disease prevention programme (EUROACTION) for patients with coronary heart disease and asymptomatic individuals at high risk of cardiovascular disease: a paired, cluster-randomised controlled trial. *Lancet* 2008;**371**:1999–2012. doi:10.1016/S0140-6736(08)60868-5
- 92 Abshire M, Xu J, Baptiste D, *et al.* Nutritional interventions in heart failure: a systematic review of the literature. *J Card Fail* 2015;**21**:989–99. doi:10.1016/j.cardfail.2015.10.004
- 93 Aldana SG, Whitmer WR, Greenlaw R, *et al.* Cardiovascular risk reductions associated with aggressive lifestyle modification and cardiac rehabilitation. *Heart Lung* 2003;**32**:374–82. doi:10.1016/s0147-9563(03)00106-7
- 94 Al-Ghamdi S. The association between olive oil consumption and primary prevention of cardiovascular diseases. *J Family Med Prim Care* 2018;**7**:859–64. doi:10.4103/jfmpc.jfmpc\_191\_18
- 95 Alpert JS. Nutritional advice for the patient with heart disease. *Circulation* 2011;**124**:e258–60. doi:10.1161/CIRCULATIONAHA.111.019828
- 96 Is carb-cutting a safe way to diet? New research suggests that a high-protein, low-carbohydrate diet is less risky than many experts had thought. Does that mean it's a healthy way to eat? *Harv Womens Health Watch* 2003;**11**:1–2.
- 97 Mediterranean diet could cut cardiovascular disease risk. *Nursing Standard* 2016;**31**:17. doi:<http://dx.doi.org/10.7748/ns.31.6.17.s21>
- 98 Protocol deviations and reanalyses in a derivative study of the PREDIMED trial. *JAMA* 2018;**320**:2272–2272. doi:10.1001/jama.2018.17893
- 99 Combination low-salt and heart-healthy “DASH” diet as effective as drugs for some adults with high blood pressure. *Nutrition Today* 2018;**53**:25.
- 100 Antony R, Torabi A, Weston J, *et al.* Effects of timing of drug therapy, salt intake and exercise on non-invasive haemodynamics - HeartCycle (FP7-216695) European Union 7th Framework Programme. *Eur J Heart Fail Supplements* 2011;**10**:S55.

- 101 Baker S, Ramani GV. Heart failure in the elderly. *Clinical Geriatrics* 2011.
- 102 Battino M, Forbes-Hernández TY, Gasparrini M, *et al.* Relevance of functional foods in the Mediterranean diet: the role of olive oil, berries and honey in the prevention of cancer and cardiovascular diseases. *Crit Rev Food Sci Nutr* 2019;**59**:893–920. doi:10.1080/10408398.2018.1526165
- 103 Becerra-Tomás N, Blanco Mejía S, Vigiouliouk E, *et al.* Mediterranean diet, cardiovascular disease and mortality in diabetes: A systematic review and meta-analysis of prospective cohort studies and randomized clinical trials. *Crit Rev Food Sci Nutr* 2020;**60**:1207–27. doi:10.1080/10408398.2019.1565281
- 104 Bemelmans WJE, Broer J, Feskens EJM, *et al.* Effect of an increased intake of alpha-linolenic acid and group nutritional education on cardiovascular risk factors: the Mediterranean Alpha-linolenic Enriched Groningen Dietary Intervention (MARGARIN) study. *Am J Clin Nutr* 2002;**75**:221–7. doi:10.1093/ajcn/75.2.221
- 105 Bloomfield HE, Kane R, Koeller E, *et al.* *Benefits and harms of the Mediterranean diet compared to other diets*. Washington (DC): Department of Veterans Affairs (US) 2015. <http://www.ncbi.nlm.nih.gov/books/NBK379574/> (accessed 13 Aug 2021).
- 106 Bulpitt CJ. Secondary prevention of coronary heart disease in the elderly. *Heart* 2005;**91**:396–400. doi:10.1136/hrt.2004.045054
- 107 Chair SY. An Indo Mediterranean diet was more effective than a conventional prudent diet in reducing coronary artery disease risk factors and events. *Evid Based Nurs* 2003;**6**:79. doi:10.1136/ebn.6.3.79
- 108 Chiavaroli L, Vigiouliouk E, Nishi SK, *et al.* DASH dietary pattern and cardiometabolic outcomes: an umbrella review of systematic reviews and meta-analyses. *Nutrients* 2019;**11**:E338. doi:10.3390/nu11020338
- 109 Chlebowski RT, Aiello E, McTiernan A. Weight loss in breast cancer patient management. *J Clin Oncol* 2002;**20**:1128–43. doi:10.1200/JCO.2002.20.4.1128
- 110 Corella D, Carrasco P, Sorlí JV, *et al.* Mediterranean diet reduces the adverse effect of the TCF7L2-rs7903146 polymorphism on cardiovascular risk factors and stroke incidence: a randomized controlled trial in a high-cardiovascular-risk population. *Diabetes Care* 2013;**36**:3803–11. doi:10.2337/dc13-0955
- 111 Sanches Machado d’Almeida K, Ronchi Spillere S, Zuchinali P, *et al.* Mediterranean diet and other dietary patterns in primary prevention of heart failure and changes in cardiac function markers: a systematic review. *Nutrients* 2018;**10**:E58. doi:10.3390/nu10010058
- 112 Dattilo AM. Reinforcing the Step II diet in patients with coronary heart disease. *J Cardiopulm Rehabil Prev* 1994;**14**:97–101.
- 113 de Lorgeril M, Salen P. Mediterranean diet in secondary prevention of CHD. *Public Health Nutr* 2011;**14**:2333–7. doi:10.1017/S136898001100259X

- 114 Dinu M, Pagliai G, Casini A, *et al.* Mediterranean diet and multiple health outcomes: An umbrella review of meta-analyses of observational studies and randomized trials. *Nutrition, Metabolism and Cardiovascular Diseases* 2017;**27**:e21. doi:10.1016/j.numecd.2016.11.055
- 115 Domenech M, Estruch R, Ros E, *et al.* Effect of the Mediterranean diet on blood pressure: the ambulatory blood pressure substudy (PREDIMED-ABPM): PP.23.423. *J Hypertens* 2010;**28**:e373. doi:10.1097/01.hjh.0000379349.42484.74
- 116 Douglas M. Mediterranean diet for heart disease. *The Journal of Family Practice* 1999;**48**:333–4.
- 117 Drouin-Chartier J-P, Côté JA, Labonté M-È, *et al.* Comprehensive review of the impact of dairy foods and dairy fat on cardiometabolic risk. *Adv Nutr* 2016;**7**:1041–51. doi:10.3945/an.115.011619
- 118 Fontecha J, Calvo MV, Juarez M, *et al.* Milk and dairy product consumption and cardiovascular diseases: an overview of systematic reviews and meta-analyses. *Adv Nutr* 2019;**10**:S164–89. doi:10.1093/advances/nmy099
- 119 Georgousopoulou EN, Mellor DD, Naumovski N, *et al.* Mediterranean lifestyle and cardiovascular disease prevention. *Cardiovasc Diagn Ther* 2017;**7**:S39-S3S47.
- 120 Goetz-Perry C. A low fat dietary pattern intervention did not reduce breast cancer, colorectal cancer, or CVD in postmenopausal women. *Evidence-Based Nursing* 2006;**9**:112–3. doi:10.1136/ebn.9.4.112
- 121 Grosso G, Marventano S, Yang J, *et al.* A comprehensive meta-analysis on evidence of Mediterranean diet and cardiovascular disease: Are individual components equal? *Crit Rev Food Sci Nutr* 2017;**57**:3218–32. doi:10.1080/10408398.2015.1107021
- 122 Guasch-Ferré M, Bulló M, Martínez-González MÁ, *et al.* Frequency of nut consumption and mortality risk in the PREDIMED nutrition intervention trial. *BMC Med* 2013;**11**:164. doi:10.1186/1741-7015-11-164
- 123 Guasch-Ferré M, Hu FB, Martínez-González MA, *et al.* Olive oil intake and risk of cardiovascular disease and mortality in the PREDIMED Study. *BMC Medicine* 2014;**12**:78. doi:10.1186/1741-7015-12-78
- 124 Henríquez-Sánchez P, Sánchez-Villegas A, Ruano-Rodríguez C, *et al.* Dietary total antioxidant capacity and mortality in the PREDIMED study. *Eur J Nutr* 2016;**55**:227–36. doi:10.1007/s00394-015-0840-2
- 125 Hiser E. The Mediterranean Diet and Cardiovascular Disease. *J Cardiopulmonary Rehabil* 1995;**15**:179–82.
- 126 Holme I, Retterstøl K, Norum KR, *et al.* Lifelong benefits on myocardial infarction mortality: 40-year follow-up of the randomized Oslo diet and antismoking study. *J Intern Med* 2016;**280**:221–7. doi:10.1111/joim.12485

- 127 Howard BV, Van Horn L, Hsia J, *et al.* Low-fat dietary pattern and risk of cardiovascular disease: the Women's Health Initiative randomized controlled dietary modification trial. *Obstet Gynecol Surv* 2006;**61**:451–3. doi:10.1097/01.ogx.0000224659.41638.7d
- 128 Kerley CP. Dietary patterns and components to prevent and treat heart failure: a comprehensive review of human studies. *Nutr Res Rev* 2019;**32**:1–27. doi:10.1017/S0954422418000148
- 129 Khan SU, Khan MU, Riaz H, *et al.* Effects of nutritional supplements and dietary interventions on cardiovascular outcomes. *Ann Intern Med* 2019;**171**:190–8. doi:10.7326/M19-0341
- 130 Kontogianni MD, Panagiotakos DB. Dietary patterns and stroke: A systematic review and re-meta-analysis. *Maturitas* 2014;**79**:41–7. doi:10.1016/j.maturitas.2014.06.014
- 131 Lagiou P, Trichopoulos D, Sandin S, *et al.* Mediterranean dietary pattern and mortality among young women: a cohort study in Sweden. *Br J Nutr* 2006;**96**:384–92. doi:10.1079/bjn20061824
- 132 Liyanage T, Ninomiya T, Wang A, *et al.* Effects of the Mediterranean diet on cardiovascular outcomes—a systematic review and meta-analysis. *PLoS One* 2016;**11**:e0159252. doi:10.1371/journal.pone.0159252
- 133 Lopaschuk G. Low-fat dietary pattern and risk of cardiovascular disease: the Women's Health Initiative Randomized Controlled Dietary Modification Trial. *Heart and Metabolism* 2006;**31**:34–6.
- 134 Ma C, Avenell A, Bolland M, *et al.* Effects of weight loss interventions for adults who are obese on mortality, cardiovascular disease, and cancer: systematic review and meta-analysis. *BMJ* 2017;**359**:j4849. doi:10.1136/bmj.j4849
- 135 Martínez-González MA, Salas-Salvadó J, Estruch R, *et al.* Benefits of the Mediterranean diet: insights from the PREDIMED study. *Prog Cardiovasc Dis* 2015;**58**:50–60. doi:10.1016/j.pcad.2015.04.003
- 136 Martínez-González MA, Zazpe I, Razquin C, *et al.* Empirically-derived food patterns and the risk of total mortality and cardiovascular events in the PREDIMED study. *Clin Nutr* 2015;**34**:859–67. doi:10.1016/j.clnu.2014.09.006
- 137 Martínez-González MA. Protocol deviations, reanalyses, and corrections to derivative studies of the PREDIMED trial. *JAMA Intern Med* 2018;**178**:1730–1. doi:10.1001/jamainternmed.2018.6456
- 138 Martínez-González MA, Gea A, Ruiz-Canela M. The Mediterranean Diet and Cardiovascular Health. *Circulation Research* 2019;**124**:779–98. doi:10.1161/CIRCRESAHA.118.313348
- 139 Mirzaee S, Kostner K. A Review of the evidence in recommended dietary fat intake and further cardiovascular events. *Heart Lung Circ* 2017;**26**:S112–3. doi:10.1016/j.hlc.2017.06.160
- 140 Mirzaee S, Nasis A, Doery J, *et al.* The impact of dietary fat on myocardial contractility and further prognosis in heart failure; friend or foe? *Heart Lung Circ* 2017;**26**:S150. doi:10.1016/j.hlc.2017.06.242

- 141 Mokhtari Z, Hosseini S, Miri R, *et al.* Relationship between Dietary Approaches to Stop Hypertension score and Alternative Healthy Eating Index score with plasma asymmetrical dimethylarginine levels in patients referring for coronary angiography. *J Hum Nutr Diet* 2015;**28**:350–6. doi:10.1111/jhn.12311
- 142 Morgan T, Adam W, Carney S, *et al.* Treatment of mild hypertension in elderly males. *Clin Sci (Lond)* 1979;**57 Suppl 5**:355s–7s. doi:10.1042/cs057355s
- 143 Nakamura Y, Okuda N, Okamura T, *et al.* Low-carbohydrate diets and cardiovascular and total mortality in Japanese: a 29-year follow-up of NIPPON DATA80. *Br J Nutr* 2014;**112**:916–24. doi:10.1017/S0007114514001627
- 144 Newberry SJ, Chung M, Anderson CAM, *et al.* *Sodium and potassium intake: effects on chronic disease outcomes and risks*. Rockville (MD): Agency for Healthcare Research and Quality (US) 2018. <http://www.ncbi.nlm.nih.gov/books/NBK519328/> (accessed 17 Aug 2021).
- 145 Niebauer J, Hambrecht R, Schlierf G, *et al.* Five years of physical exercise and low fat diet: effects on progression of coronary artery disease. *J Cardiopulm Rehabil Prev* 1995;**15**:47–64.
- 146 Paisley RB, Harvey P, Rice S, *et al.* Short-term results of an open trial of very low calorie diet or intensive conventional diet in Type 2 diabetes. *Practical Diabetes International* 1995;**12**:263–7. doi:10.1002/pdi.1960120611
- 147 Panagiotakos DB, Pitsavos C, Arvaniti F, *et al.* Adherence to the Mediterranean food pattern predicts the prevalence of hypertension, hypercholesterolemia, diabetes and obesity, among healthy adults; the accuracy of the MedDietScore. *Prev Med* 2007;**44**:335–40. doi:10.1016/j.ypmed.2006.12.009
- 148 Panagiotakos DB, Pitsavos C, Chrysohoou C, *et al.* Five-year incidence of cardiovascular disease and its predictors in Greece: the ATTICA study. *Vasc Med* 2008;**13**:113–21. doi:10.1177/1358863x07087731
- 149 Panagiotakos D. A Mediterranean diet supplemented with olive oil or nuts reduces the incidence of major cardiovascular events in high-risk patients. *Evid Based Med* 2014;**19**:10. doi:10.1136/eb-2013-101391
- 150 Paradis G, Fodor JG. Diet and the prevention of cardiovascular diseases. *Can J Cardiol* 1999;**15 Suppl G**:81G–8G.
- 151 Parrinello G, Torres D, Paterna S, *et al.* Long period effects of high diuretic doses plus normal-sodium diet and fluid restriction on cytokines levels, body hydration and outcome in recently compensated heart failure patients. *Eur J Heart Fail Supplements* 2009;**8**:ii7.
- 152 Rees K, Dyakova M, Ward K, *et al.* Dietary advice for reducing cardiovascular risk. *Cochrane Database of Systematic Reviews* 2013;**3**. doi:10.1002/14651858.CD002128.pub4
- 153 Ross SM. Effects of extra virgin olive oil phenolic compounds and the Mediterranean diet on cardiovascular health. *Holist Nurs Pract* 2013;**27**:303–7. doi:10.1097/HNP.0b013e3182a0c668

- 154 Sánchez-Sánchez ML, García-Vigara A, Hidalgo-Mora JJ, *et al.* Mediterranean diet and health: A systematic review of epidemiological studies and intervention trials. *Maturitas* 2020;**136**:25–37. doi:10.1016/j.maturitas.2020.03.008
- 155 Schröder H, Salas-Salvadó J, Martínez-González MA, *et al.* Baseline adherence to the Mediterranean diet and major cardiovascular events: Prevención con Dieta Mediterránea trial. *JAMA Intern Med* 2014;**174**:1690–2. doi:10.1001/jamainternmed.2014.3463
- 156 Shvetsov YB, Harmon BE, Ettienné R, *et al.* The influence of energy standardisation on the alternate Mediterranean diet score and its association with mortality in the Multiethnic Cohort. *Br J Nutr* 2016;**116**:1592–601. doi:10.1017/S0007114516003482
- 157 Soman CR. Indo-Mediterranean diet and progression of coronary artery disease. *Lancet* 2005;**366**:365–6. doi:10.1016/S0140-6736(05)67014-6
- 158 Stranges S, Takeda A, Martin N, *et al.* Mediterranean-style diet for the primary and secondary prevention of cardiovascular disease: Cochrane systematic review and meta-analysis of randomised clinical trials. *Eur Heart J* 2019;**40**. doi:10.1093/eurheartj/ehz746.0279
- 159 Tops LF. Diet and lifestyle approaches in the prevention of cardiovascular disease. *Neth Heart J* 2006;**14**:22–3.
- 160 Torres D, Parrnello G, Paterna S, *et al.* High oral diuretic doses plus normal-sodium diet and fluid restriction in recently compensated heart failure: long-term effects on cytokines, congestion and outcome. *Eur Heart J* 2010;**31**:848–9.
- 161 Trichopoulos D, Lagiou P. Mediterranean diet and overall mortality differences in the European Union. *Public Health Nutr* 2004;**7**:949–51. doi:10.1079/PHN2004559
- 162 Turgeon R, Janke F, Kolber MR. Omega-3 for patients with cardiovascular disease. *Can Fam Physician* 2012;**58**:1225.
- 163 Vrentzos GE, Papadakis JA, Malliaraki N, *et al.* Diet, serum homocysteine levels and ischaemic heart disease in a Mediterranean population. *Br J Nutr* 2004;**91**:1013–9. doi:10.1079/BJN20041145
- 164 Wright N, Wilson L, Smith M, *et al.* The BROAD study: A randomised controlled trial using a whole food plant-based diet in the community for obesity, ischaemic heart disease or diabetes. *Nutr Diabetes* 2017;**7**:e256–e256. doi:10.1038/nutd.2017.3
- 165 Yancy WS, Westman EC, French PA, *et al.* Diets and clinical coronary events: the truth is out there. *Circulation* 2003;**107**:10–6. doi:10.1161/01.cir.0000049205.35749.00
- 166 Barzi F, Hughes JT, Singh G, *et al.* An omega 3 fatty acid supplemented diet was not associated with enhanced survival in maintenance haemodialysis: the Fish and Fruit Study. *Renal Society of Australasia Journal* 2020;**16**:69–82. doi:10.33235/rsaj.16.2.69-82
- 167 Burr ML, Ashfield-Watt P a. L, Dunstan FDJ, *et al.* Lack of benefit of dietary advice to men with angina: results of a controlled trial. *Eur J Clin Nutr* 2003;**57**:193–200. doi:10.1038/sj.ejcn.1601539

- 168 Chang H-Y, Hu Y-W, Yue C-SJ, *et al.* Effect of potassium-enriched salt on cardiovascular mortality and medical expenses of elderly men. *Am J Clin Nutr* 2006;**83**:1289–96. doi:10.1093/ajcn/83.6.1289
- 169 China Salt Substitute Study Collaborative Group. Salt substitution: a low-cost strategy for blood pressure control among rural Chinese. A randomized, controlled trial. *J Hypertens* 2007;**25**:2011–8. doi:10.1097/HJH.0b013e3282b9714b
- 170 Edelman D, Oddone EZ, Liebowitz RS, *et al.* A multidimensional integrative medicine intervention to improve cardiovascular risk. *J Gen Intern Med* 2006;**21**:728–34. doi:10.1111/j.1525-1497.2006.00495.x
- 171 Giallauria F, Lucci R, D’Agostino M, *et al.* Two-year multicomprehensive secondary prevention program: favorable effects on cardiovascular functional capacity and coronary risk profile after acute myocardial infarction. *J Cardiovasc Med (Hagerstown)* 2009;**10**:772–80. doi:10.2459/JCM.0b013e32832d55fe
- 172 Hämäläinen H, Luurila OJ, Kallio V, *et al.* Reduction in sudden deaths and coronary mortality in myocardial infarction patients after rehabilitation. 15 year follow-up study. *Eur Heart J* 1995;**16**:1839–44. doi:10.1093/oxfordjournals.eurheartj.a060837
- 173 Heller SR, Clarke P, Daly H, *et al.* Group education for obese patients with type 2 diabetes: greater success at less cost. *Diabet Med* 1988;**5**:552–6. doi:10.1111/j.1464-5491.1988.tb01050.x
- 174 Horie NC, Serrao VT, Simon SS, *et al.* Cognitive effects of intentional weight loss in elderly obese individuals with mild cognitive impairment. *J Clin Endocrinol Metab* 2016;**101**:1104–12. doi:10.1210/jc.2015-2315
- 175 Lear SA, Spinelli JJ, Linden W, *et al.* The Extensive Lifestyle Management Intervention (ELMI) after cardiac rehabilitation: a 4-year randomized controlled trial. *Am Heart J* 2006;**152**:333–9. doi:10.1016/j.ahj.2005.12.023
- 176 Licata G, Di Pasquale P, Parrinello G, *et al.* Effects of high-dose furosemide and small-volume hypertonic saline solution infusion in comparison with a high dose of furosemide as bolus in refractory congestive heart failure: long-term effects. *Am Heart J* 2003;**145**:459–66. doi:10.1067/mhj.2003.166
- 177 Manchanda SC, Narang R, Reddy KS, *et al.* Retardation of coronary atherosclerosis with yoga lifestyle intervention. *J Assoc Physicians India* 2000;**48**:687–94.
- 178 Morgan T, Adam W, Gillies A, *et al.* Hypertension treated by salt restriction. *Lancet* 1978;**1**:227–30. doi:10.1016/s0140-6736(78)90479-8
- 179 Oldenburg B, Martin A, Greenwood J, *et al.* A controlled trial of a behavioral and educational intervention following coronary artery bypass surgery. *J Cardiopulm Rehabil* 1995;**15**:39–46. doi:10.1097/00008483-199501000-00006
- 180 Paterna S, Fasullo S, Parrinello G, *et al.* Short-term effects of hypertonic saline solution in acute heart failure and long-term effects of a moderate sodium restriction in patients with compensated



- heart failure with New York Heart Association class III (Class C) (SMAC-HF Study). *Am J Med Sci* 2011;**342**:27–37. doi:10.1097/MAJ.0b013e31820f10ad
- 181 Philipson H, Ekman I, Swedberg K, *et al.* A pilot study of salt and water restriction in patients with chronic heart failure. *Scand Cardiovasc J* 2010;**44**:209–14. doi:10.3109/14017431003698523
- 182 Philipson H, Ekman I, Forslund HB, *et al.* Salt and fluid restriction is effective in patients with chronic heart failure. *Eur J Heart Fail* 2013;**15**:1304–10. doi:10.1093/eurjhf/hft097
- 183 P.RE.COR. Group. Comparison of a rehabilitation programme, a counselling programme and usual care after an acute myocardial infarction: results of a long-term randomized trial. P.RE.COR. Group. *Eur Heart J* 1991;**12**:612–6. doi:10.1093/oxfordjournals.eurheartj.a059948
- 184 Redfern J, Briffa T, Ellis E, *et al.* Choice of secondary prevention improves risk factors after acute coronary syndrome: 1-year follow-up of the CHOICE (Choice of Health Options In prevention of Cardiovascular Events) randomised controlled trial. *Heart* 2009;**95**:468–75. doi:10.1136/hrt.2008.150870
- 185 Fagerberg B, Wikstrand J, Berglund G, *et al.* Mortality rates in treated hypertensive men with additional risk factors are high but can be reduced: a randomized intervention study. *Am J Hypertens* 1998;**11**:14–22. doi:10.1016/s0895-7061(97)00363-4
- 186 Salminen M, Isoaho R, Vahlberg T, *et al.* Effects of health advocacy, counseling, and activation among older coronary heart disease (CHD) patients. *Aging Clin Exp Res* 2005;**17**:472–8. doi:10.1007/BF03327414
- 187 Smeulders ESTF, van Haastregt JCM, Ambergen T, *et al.* The impact of a self-management group programme on health behaviour and healthcare utilization among congestive heart failure patients. *Eur J Heart Fail* 2009;**11**:609–16. doi:10.1093/eurjhf/hfp047
- 188 Sundin O, Lisspers J, Hofman-Bang C, *et al.* Comparing multifactorial lifestyle interventions and stress management in coronary risk reduction. *Int J Behav Med* 2003;**10**:191–204. doi:10.1207/s15327558ijbm1003\_01
- 189 Effects of weight loss and sodium reduction intervention on blood pressure and hypertension incidence in overweight people with high-normal blood pressure. The Trials of Hypertension Prevention, phase II. The Trials of Hypertension Prevention Collaborative Research Group. *Arch Intern Med* 1997;**157**:657–67.
- 190 Wister A, Loewen N, Kennedy-Symonds H, *et al.* One-year follow-up of a therapeutic lifestyle intervention targeting cardiovascular disease risk. *CMAJ* 2007;**177**:859–65. doi:10.1503/cmaj.061059
- 191 Bennett GG, Warner ET, Glasgow RE, *et al.* Obesity treatment for socioeconomically disadvantaged patients in primary care practice. *Arch Intern Med* 2012;**172**:565–74. doi:10.1001/archinternmed.2012.1

- 192 Boesch C, Myers J, Habersaat A, *et al.* Maintenance of exercise capacity and physical activity patterns 2 years after cardiac rehabilitation. *J Cardiopulm Rehabil* 2005;**25**:14–21; quiz 22–3. doi:10.1097/00008483-200501000-00004
- 193 Brensike JF, Levy RI, Kelsey SF, *et al.* Effects of therapy with cholestyramine on progression of coronary arteriosclerosis: results of the NHLBI Type II Coronary Intervention Study. *Circulation* 1984;**69**:313–24. doi:10.1161/01.cir.69.2.313
- 194 Cook NR, Appel LJ, Whelton PK. Sodium intake and all-cause mortality over 20 years in the Trials of Hypertension Prevention. *J Am Coll Cardiol* 2016;**68**:1609–17. doi:10.1016/j.jacc.2016.07.745
- 195 Ericsson CG, Nilsson J, Grip L, *et al.* Effect of bezafibrate treatment over five years on coronary plaques causing 20% to 50% diameter narrowing (The Bezafibrate Coronary Atherosclerosis Intervention Trial [BECAIT]). *Am J Cardiol* 1997;**80**:1125–9. doi:10.1016/s0002-9149(97)00626-7
- 196 GISSI Prevenzione Investigators. Results of the low-dose (20 mg) pravastatin GISSI Prevenzione trial in 4271 patients with recent myocardial infarction: do stopped trials contribute to overall knowledge? GISSI Prevenzione Investigators (Gruppo Italiano per lo Studio della Sopravvivenza nell'Infarto Miocardico). *Ital Heart J* 2000;**1**:810–20.
- 197 Kato NP, Kinugawa K, Sano M, *et al.* How effective is an in-hospital heart failure self-care program in a Japanese setting? Lessons from a randomized controlled pilot study. *Patient Prefer Adherence* 2016;**10**:171–81. doi:10.2147/PPA.S100203
- 198 Levy RI. Report on the Lipid Research Clinic trials. *Eur Heart J* 1987;**8 Suppl E**:45–53. doi:10.1093/eurheartj/8.suppl\_e.45
- 199 Mueller L, Myers J, Kottman W, *et al.* Exercise capacity, physical activity patterns and outcomes six years after cardiac rehabilitation in patients with heart failure. *Clin Rehabil* 2007;**21**:923–31. doi:10.1177/0269215507079097
- 200 Müller L, Myers J, Kottman W, *et al.* Long-term myocardial adaptations after cardiac rehabilitation in heart failure: a randomized six-year evaluation using magnetic resonance imaging. *Clin Rehabil* 2009;**23**:986–94. doi:10.1177/0269215509339003
- 201 Wageningen University. Alpha Omega Trial: A Randomised, Placebo Controlled, Double Blind Intervention Study of the Effect of Low Doses of Omega-3 Fatty Acids on Cardiovascular Diseases in Patients With a History of Myocardial Infarction. clinicaltrials.gov 2010. <https://clinicaltrials.gov/ct2/show/NCT00127452> (accessed 17 Aug 2021).
- 202 Kitakaze M. The Japan Working Group for the Assessment That the Alpha-glucosidase Inhibitor Blocks Cardiac Events in Patients With Myocardial Infarction and IGT. clinicaltrials.gov 2018. <https://clinicaltrials.gov/ct2/show/NCT00212017> (accessed 17 Aug 2021).
- 203 Assistance Publique - Hôpitaux de Paris. Secondary Prevention of Atrial Fibrillation With an Alpha-Linolenic Enriched Diet : a Randomized Study. clinicaltrials.gov 2006. <https://clinicaltrials.gov/ct2/show/NCT00410020> (accessed 18 Aug 2021).

- 204 Pierce DG. A Double Blind, Randomized, Placebo Controlled, Study for Assessment of Dietary Flaxseed on Improving Symptoms of Cardiovascular Disease in Patients With Peripheral Arterial Disease. *clinicaltrials.gov* 2016. <https://clinicaltrials.gov/ct2/show/NCT00781950> (accessed 18 Aug 2021).
- 205 Pin NT. Randomized Controlled Trial of Community-based Nutritional, Physical and Cognitive Training Intervention Programmes for At Risk Frail Elderly. *clinicaltrials.gov* 2014. <https://clinicaltrials.gov/ct2/show/NCT00973258> (accessed 18 Aug 2021).
- 206 MPH TK MD. A Combined Lifestyle and Medication Intervention to Reduce CVD Risk. *clinicaltrials.gov* 2013. <https://clinicaltrials.gov/ct2/show/NCT01245686> (accessed 18 Aug 2021).
- 207 Carrasquillo O. Hispanic Secondary Stroke Prevention Initiative. *clinicaltrials.gov* 2019. <https://clinicaltrials.gov/ct2/show/NCT02251834> (accessed 18 Aug 2021).
- 208 Muggia C. Diet Therapy Versus Prescriptive Educational Group Intervention in Overweight / Obese Patients at First Episode of AMI: a Randomized Controlled Trial. *clinicaltrials.gov* 2014. <https://clinicaltrials.gov/ct2/show/NCT02323802> (accessed 18 Aug 2021).
- 209 Sharrief AZ. STEPs to Blood Pressure Reduction. A Randomized Clinical Trial of the Stroke Transitions, Education, and Prevention Clinic Versus Usual Care for Post-Stroke Blood Pressure Reduction. *clinicaltrials.gov* 2020. <https://clinicaltrials.gov/ct2/show/NCT02591394> (accessed 18 Aug 2021).
- 210 Hwang CH. Intermittent Fasting Following Acute Ischemic Stroke: Prospective, Randomized, Parallel Group, Controlled Trial. *clinicaltrials.gov* 2019. <https://clinicaltrials.gov/ct2/show/NCT03789409> (accessed 18 Aug 2021).
- 211 Halle M. Lifestyle Intervention in Chronic Ischemic Heart Disease and Diabetes. *clinicaltrials.gov* 2020. <https://clinicaltrials.gov/ct2/show/NCT03835923> (accessed 18 Aug 2021).
- 212 Population Health Research Institute. Diet and Exercise Frailty Intervention in Cardiac Device Patients Trial Pilot. *clinicaltrials.gov* 2019. <https://clinicaltrials.gov/ct2/show/NCT04052672> (accessed 18 Aug 2021).
- 213 Afilalo J. The TARGET-EFT Trial (Multicomponent Acute Intervention in Frail Geriatric Patients With Cardiovascular Disease Using the Essential Frailty Toolset). *clinicaltrials.gov* 2020. <https://clinicaltrials.gov/ct2/show/NCT04291690> (accessed 18 Aug 2021).
- 214 Nanfang Hospital of Southern Medical University. Development, Demonstration and Evaluation of Model of Cardiovascular and Cerebrovascular 'Co-Prevention and Co-Management' Based on Internet+. *clinicaltrials.gov* 2020. <https://clinicaltrials.gov/ct2/show/NCT04409210> (accessed 18 Aug 2021).
- 215 Swinburn BA, Carey D, Hills AP, *et al*. Effect of orlistat on cardiovascular disease risk in obese adults. *Diabetes Obes Metab* 2005;**7**:254–62. doi:10.1111/j.1463-1326.2004.00467.x

- 216 Whitney EJ, Krasuski RA, Personius BE, *et al.* A randomized trial of a strategy for increasing high-density lipoprotein cholesterol levels: effects on progression of coronary heart disease and clinical events. *Ann Intern Med* 2005;**142**:95–104. doi:10.7326/0003-4819-142-2-200501180-00008
- 217 Abed HS, Wittert GA, Leong DP, *et al.* Effect of weight reduction and cardiometabolic risk factor management on symptom burden and severity in patients with atrial fibrillation: a randomized clinical trial. *JAMA* 2013;**310**:2050–60. doi:10.1001/jama.2013.280521
- 218 Zahedi M, Akhlagh SA, Aboomardani M, *et al.* Efficacy of Mediterranean diet on blood biochemical factors in type II diabetic patients: a randomized controlled trial. *Gazi Medical Journal*; **31**:714–8.
- 219 Wycherley TP, Thompson CH, Buckley JD, *et al.* Long-term effects of weight loss with a very-low carbohydrate, low saturated fat diet on flow mediated dilatation in patients with type 2 diabetes: A randomised controlled trial. *Atherosclerosis* 2016;**252**:28–31. doi:10.1016/j.atherosclerosis.2016.07.908
- 220 Kwok TCY, Lam LCW, Sea MMM, *et al.* A randomized controlled trial of dietetic interventions to prevent cognitive decline in old age hostel residents. *Eur J Clin Nutr* 2012;**66**:1135–40. doi:10.1038/ejcn.2012.117
- 221 Anderson J, Garrity T, Smith B, *et al.* Follow-up on a clinical trial comparing the effects of two lipid lowering diets. *Arteriosclerosis* 1990;**10**:882a.
- 222 Azadbakht L, Mirmiran P, Esmailzadeh A, *et al.* Better dietary adherence and weight maintenance achieved by a long-term moderate-fat diet. *Br J Nutr* 2007;**97**:399–404. doi:10.1017/S0007114507328602
- 223 Brügemann J, Poels BJJ, Oosterwijk MH, *et al.* A randomised controlled trial of cardiac rehabilitation after revascularisation. *Int J Cardiol* 2007;**119**:59–64. doi:10.1016/j.ijcard.2006.07.047
- 224 Cooper H, Booth K, Gill G. Using combined research methods for exploring diabetes patient education. *Patient Educ Couns* 2003;**51**:45–52. doi:10.1016/s0738-3991(02)00265-3
- 225 Elhayany A, Lustman A, Abel R, *et al.* A low carbohydrate Mediterranean diet improves cardiovascular risk factors and diabetes control among overweight patients with type 2 diabetes mellitus: a 1-year prospective randomized intervention study. *Diabetes Obes Metab* 2010;**12**:204–9. doi:10.1111/j.1463-1326.2009.01151.x
- 226 Esposito K, Maiorino MI, Di Palo C, *et al.* Adherence to a Mediterranean diet and glycaemic control in Type 2 diabetes mellitus. *Diabet Med* 2009;**26**:900–7. doi:10.1111/j.1464-5491.2009.02798.x
- 227 Fitó M, Estruch R, Salas-Salvadó J, *et al.* Effect of the Mediterranean diet on heart failure biomarkers: a randomized sample from the PREDIMED trial. *Eur J Heart Fail* 2014;**16**:543–50. doi:10.1002/ejhf.61
- 228 Higgins HC, Hayes RL, McKenna KT. Rehabilitation outcomes following percutaneous coronary interventions (PCI). *Patient Educ Couns* 2001;**43**:219–30. doi:10.1016/s0738-3991(00)00164-6

- 229 Ko S-H, Song K-H, Kim S-R, *et al.* Long-term effects of a structured intensive diabetes education programme (SIDEPE) in patients with Type 2 diabetes mellitus--a 4-year follow-up study. *Diabet Med* 2007;**24**:55–62. doi:10.1111/j.1464-5491.2007.02013.x
- 230 Lasa A, Miranda J, Bulló M, *et al.* Comparative effect of two Mediterranean diets versus a low-fat diet on glycaemic control in individuals with type 2 diabetes. *Eur J Clin Nutr* 2014;**68**:767–72. doi:10.1038/ejcn.2014.1
- 231 Lear SA, Ignaszewski A, Laquer EA, *et al.* Extensive lifestyle management intervention following cardiac rehabilitation: pilot study. *Rehabil Nurs* 2001;**26**:227–32. doi:10.1002/j.2048-7940.2001.tb01960.x
- 232 McHugh F, Lindsay GM, Hanlon P, *et al.* Nurse led shared care for patients on the waiting list for coronary artery bypass surgery: a randomised controlled trial. *Heart* 2001;**86**:317–23. doi:10.1136/heart.86.3.317
- 233 Mildestvedt T, Meland E, Eide GE. No difference in lifestyle changes by adding individual counselling to group-based rehabilitation RCT among coronary heart disease patients. *Scand J Public Health* 2007;**35**:591–8. doi:10.1080/14034940701349241
- 234 Murphy AW, Cupples ME, Smith SM, *et al.* Effect of tailored practice and patient care plans on secondary prevention of heart disease in general practice: cluster randomised controlled trial. *BMJ* 2009;**339**:b4220. doi:10.1136/bmj.b4220
- 235 Nilsson PM, Klasson EB, Nyberg P. Life-style intervention at the worksite--reduction of cardiovascular risk factors in a randomized study. *Scand J Work Environ Health* 2001;**27**:57–62. doi:10.5271/sjweh.587
- 236 Nordmann A, Heilmbauer I, Walker T, *et al.* A case-management program of medium intensity does not improve cardiovascular risk factor control in coronary artery disease patients: the Heartcare I trial. *Am J Med* 2001;**110**:543–50. doi:10.1016/s0002-9343(01)00682-9
- 237 O'Neil PM, Miller-Kovach K, Tuerk PW, *et al.* Randomized controlled trial of a nationally available weight control program tailored for adults with type 2 diabetes. *Obesity (Silver Spring)* 2016;**24**:2269–77. doi:10.1002/oby.21616
- 238 Appel LJ, Champagne CM, Harsha DW, *et al.* Effects of comprehensive lifestyle modification on blood pressure control: main results of the PREMIER clinical trial. *JAMA* 2003;**289**:2083–93. doi:10.1001/jama.289.16.2083
- 239 Redfern J, Briffa T, Ellis E, *et al.* Patient-centered modular secondary prevention following acute coronary syndrome: a randomized controlled trial. *J Cardiopulm Rehabil Prev* 2008;**28**:107–15; quiz 116–7. doi:10.1097/01.HCR.0000314204.86805.13
- 240 Rivellese AA, Auletta P, Marotta G, *et al.* Long term metabolic effects of two dietary methods of treating hyperlipidaemia. *BMJ* 1994;**308**:227–31. doi:10.1136/bmj.308.6923.227

- 241 Sarkkinen ES, Uusitupa MI, Pietinen P, *et al.* Long-term effects of three fat-modified diets in hypercholesterolemic subjects. *Atherosclerosis* 1994;**105**:9–23. doi:10.1016/0021-9150(94)90003-5
- 242 Seppelt B, Weststrate JA, Reinert A, *et al.* [Long-term effects of nutrition with fat-reduced foods on energy consumption and body weight]. *Z Ernahrungswiss* 1996;**35**:369–77. doi:10.1007/BF01610555
- 243 Shibayama T, Kobayashi K, Takano A, *et al.* Effectiveness of lifestyle counseling by certified expert nurse of Japan for non-insulin-treated diabetic outpatients: A 1-year randomized controlled trial. *Diabetes Res Clin Pract* 2007;**76**:265–8. doi:10.1016/j.diabres.2006.09.017
- 244 Strychar I, Cohn JS, Renier G, *et al.* Effects of a diet higher in carbohydrate/lower in fat versus lower in carbohydrate/higher in monounsaturated fat on postmeal triglyceride concentrations and other cardiovascular risk factors in type 1 diabetes. *Diabetes Care* 2009;**32**:1597–9. doi:10.2337/dc08-2322
- 245 Young RJ, Taylor J, Friede T, *et al.* Pro-active call center treatment support (PACCTS) to improve glucose control in type 2 diabetes: a randomized controlled trial. *Diabetes Care* 2005;**28**:278–82. doi:10.2337/diacare.28.2.278
- 246 Yu C-M, Lau C-P, Chau J, *et al.* A short course of cardiac rehabilitation program is highly cost effective in improving long-term quality of life in patients with recent myocardial infarction or percutaneous coronary intervention. *Arch Phys Med Rehabil* 2004;**85**:1915–22. doi:10.1016/j.apmr.2004.05.010
- 247 Mildestvedt T, Meland E, Eide GE. How important are individual counselling, expectancy beliefs and autonomy for the maintenance of exercise after cardiac rehabilitation? *Scand J Public Health* 2008;**36**:832–40. doi:10.1177/1403494808090633
- 248 Niebauer J, Hambrecht R, Velich T, *et al.* Predictive value of lipid profile for salutary coronary angiographic changes in patients on a low-fat diet and physical exercise program. *Am J Cardiol* 1996;**78**:163–7. doi:10.1016/s0002-9149(96)90390-2
- 249 Nikolaus T, Schlierf G, Vogel G, *et al.* Treatment of coronary heart disease with diet and exercise--problems of compliance. *Ann Nutr Metab* 1991;**35**:1–7. doi:10.1159/000177615
- 250 Appel LJ, Espeland MA, Easter L, *et al.* Effects of reduced sodium intake on hypertension control in older individuals: results from the Trial of Nonpharmacologic Interventions in the Elderly (TONE). *Arch Intern Med* 2001;**161**:685–93. doi:10.1001/archinte.161.5.685
- 251 Bemelmans WJ, Broer J, de Vries JH, *et al.* Impact of Mediterranean diet education versus posted leaflet on dietary habits and serum cholesterol in a high risk population for cardiovascular disease. *Public Health Nutr* 2000;**3**:273–83. doi:10.1017/s1368980000000318
- 252 Brehm BJ, Lattin BL, Summer SS, *et al.* One-year comparison of a high-monounsaturated fat diet with a high-carbohydrate diet in type 2 diabetes. *Diabetes Care* 2009;**32**:215–20. doi:10.2337/dc08-0687

- 253 Brinkworth GD, Noakes M, Parker B, *et al.* Long-term effects of advice to consume a high-protein, low-fat diet, rather than a conventional weight-loss diet, in obese adults with type 2 diabetes: one-year follow-up of a randomised trial. *Diabetologia* 2004;**47**:1677–86. doi:10.1007/s00125-004-1511-7
- 254 Brinkworth GD, Noakes M, Keogh JB, *et al.* Long-term effects of a high-protein, low-carbohydrate diet on weight control and cardiovascular risk markers in obese hyperinsulinemic subjects. *Int J Obes Relat Metab Disord* 2004;**28**:661–70. doi:10.1038/sj.ijo.0802617
- 255 Carey VJ, Bishop L, Charleston J, *et al.* Rationale and design of the Optimal Macro-Nutrient Intake Heart Trial to Prevent Heart Disease (OMNI-Heart). *Clin Trials* 2005;**2**:529–37. doi:10.1191/1740774505cn123oa
- 256 Ebbeling CB, Leidig MM, Sinclair KB, *et al.* Effects of an ad libitum low-glycemic load diet on cardiovascular disease risk factors in obese young adults. *Am J Clin Nutr* 2005;**81**:976–82. doi:10.1093/ajcn/81.5.976
- 257 Eguaras S, Toledo E, Buil-Cosiales P, *et al.* Does the Mediterranean diet counteract the adverse effects of abdominal adiposity? *Nutr Metab Cardiovasc Dis* 2015;**25**:569–74. doi:10.1016/j.numecd.2015.03.001
- 258 Elkoustaf RA, Ismail M, Batiste C, *et al.* Diet and ischemic burden: a comparative analysis of a plant based regimen versus a mediterranean regimen in patients with coronary artery disease. *J Am Coll Cardiol* 2017;**69**:48–48. doi:10.1016/S0735-1097(17)33437-X
- 259 Entwistle T, Miura K, Keevil BG, *et al.* Mediterranean and low-fat diets reduce cardiovascular disease after both heart and lung transplantation: results from a randomised trial with 12 month follow up. *Transplantation* 2018;**102**:S65. doi:10.1097/01.tp.0000542640.80629.c3
- 260 Esposito K, Di Palo C, Maiorino MI, *et al.* Long-term effect of Mediterranean-style diet and calorie restriction on biomarkers of longevity and oxidative stress in overweight men. *Cardiol Res Pract* 2010;**2011**:293916. doi:10.4061/2011/293916
- 261 Esposito K, Maiorino MI, Petrizzo M, *et al.* The effects of a Mediterranean diet on the need for diabetes drugs and remission of newly diagnosed type 2 diabetes: follow-up of a randomized trial. *Diabetes Care* 2014;**37**:1824–30. doi:10.2337/dc13-2899
- 262 Gepner Y, Shelef I, Komy O, *et al.* The beneficial effects of Mediterranean diet over low-fat diet may be mediated by decreasing hepatic fat content. *J Hepatol* 2019;**71**:379–88. doi:10.1016/j.jhep.2019.04.013
- 263 Gould KL, Ornish D, Scherwitz L, *et al.* Changes in myocardial perfusion abnormalities by positron emission tomography after long-term, intense risk factor modification. *JAMA* 1995;**274**:894–901. doi:10.1001/jama.1995.03530110056036
- 264 Dalle Grave R, Calugi S, Gavasso I, *et al.* A randomized trial of energy-restricted high-protein versus high-carbohydrate, low-fat diet in morbid obesity. *Obesity (Silver Spring)* 2013;**21**:1774–81. doi:10.1002/oby.20320

- 265 Guldbrand H, Dizdar B, Bunjaku B, *et al.* In type 2 diabetes, randomisation to advice to follow a low-carbohydrate diet transiently improves glycaemic control compared with advice to follow a low-fat diet producing a similar weight loss. *Diabetologia* 2012;**55**:2118–27. doi:10.1007/s00125-012-2567-4
- 266 Heyden S, Tyroler HA, Hames CG, *et al.* Diet treatment of obese hypertensives. *Clin Sci Mol Med Suppl* 1973;**45 Suppl 1**:209s–12. doi:10.1042/cs045209s
- 267 Jennings A, Berendsen AM, de Groot LCPGM, *et al.* Mediterranean-style diet improves systolic blood pressure and arterial stiffness in older adults. *Hypertension* 2019;**73**:578–86. doi:10.1161/HYPERTENSIONAHA.118.12259
- 268 Harsha DW, Lin PH, Obarzanek E, *et al.* Dietary Approaches to Stop Hypertension: a summary of study results. DASH Collaborative Research Group. *J Am Diet Assoc* 1999;**99**:S35–39. doi:10.1016/s0002-8223(99)00414-9
- 269 Langford HG, Blaufox MD, Oberman A, *et al.* Dietary therapy slows the return of hypertension after stopping prolonged medication. *JAMA* 1985;**253**:657–64.
- 270 Lim SS, Noakes M, Keogh JB, *et al.* Long-term effects of a low carbohydrate, low fat or high unsaturated fat diet compared to a no-intervention control. *Nutr Metab Cardiovasc Dis* 2010;**20**:599–607. doi:10.1016/j.numecd.2009.05.003
- 271 Maiorino MI, Bellastella G, Petrizzo M, *et al.* Mediterranean diet cools down the inflammatory milieu in type 2 diabetes: the MÉDITA randomized controlled trial. *Endocrine* 2016;**54**:634–41. doi:10.1007/s12020-016-0881-1
- 272 Maiorino MI, Bellastella G, Petrizzo M, *et al.* Effect of a Mediterranean diet on endothelial progenitor cells and carotid intima-media thickness in type 2 diabetes: Follow-up of a randomized trial. *Eur J Prev Cardiol* 2017;**24**:399–408. doi:10.1177/2047487316676133
- 273 Murie-Fernandez M, Irimia P, Toledo E, *et al.* Carotid intima-media thickness changes with Mediterranean diet: a randomized trial (PREDIMED-Navarra). *Atherosclerosis* 2011;**219**:158–62. doi:10.1016/j.atherosclerosis.2011.06.050
- 274 Oshakbayev K, Dukenbayeva B, Otarbayev N, *et al.* Weight loss therapy for clinical management of patients with some atherosclerotic diseases: a randomized clinical trial. *Nutr J* 2015;**14**:120. doi:10.1186/s12937-015-0108-y
- 275 Steinberg D, Kay M, Burroughs J, *et al.* The effect of a digital behavioral weight loss intervention on adherence to the Dietary Approaches to Stop Hypertension (DASH) dietary pattern in medically vulnerable primary care patients: results from a randomized controlled trial. *J Acad Nutr Diet* 2019;**19**:574–84. doi:10.1016/j.jand.2018.12.011
- 276 Tay J, Luscombe-Marsh ND, Thompson CH, *et al.* Comparison of low- and high-carbohydrate diets for type 2 diabetes management: a randomized trial. *Am J Clin Nutr* 2015;**102**:780–90. doi:10.3945/ajcn.115.112581



- 277 Hu T, Yao L, Reynolds K, *et al.* The effects of a low-carbohydrate diet vs. a low-fat diet on novel cardiovascular risk factors: a randomized controlled trial. *Nutrients* 2015;**7**:7978–94. doi:10.3390/nu7095377
- 278 Toobert DJ, Strycker LA, Barrera M, *et al.* Seven-year follow-up of a multiple-health-behavior diabetes intervention. *Am J Health Behav* 2010;**34**:680–94. doi:10.5993/ajhb.34.6.5
- 279 Wong MCS, Wang HHX, Kwan MWM, *et al.* The effectiveness of Dietary Approaches to Stop Hypertension (DASH) counselling on estimated 10-year cardiovascular risk among patients with newly diagnosed grade 1 hypertension: A randomised clinical trial. *Int J Cardiol* 2016;**224**:79–87. doi:10.1016/j.ijcard.2016.08.334
- 280 Yancy WS Jr, Crowley MJ, Dar MS, *et al.* Comparison of group medical visits combined with intensive weight management vs group medical visits alone for glycemia in patients with type 2 diabetes: a noninferiority randomized clinical trial. *JAMA Intern Med* 2020;**180**:70–9. doi:10.1001/jamainternmed.2019.4802
- 281 Chen C-Y, Huang W-S, Chen H-C, *et al.* Effect of a 90 g/day low-carbohydrate diet on glycaemic control, small, dense low-density lipoprotein and carotid intima-media thickness in type 2 diabetic patients: An 18-month randomised controlled trial. *PLOS ONE* 2020;**15**:e0240158. doi:10.1371/journal.pone.0240158
- 282 Unda Villafuerte F, Llobera Cànaves J, Lorente Montalvo P, *et al.* Effectiveness of a multifactorial intervention, consisting of self-management of antihypertensive medication, self-measurement of blood pressure, hypocaloric and low sodium diet, and physical exercise, in patients with uncontrolled hypertension taking 2 or more antihypertensive drugs: The MEDICHY study. *Medicine* 2020;**99**:e19769. doi:10.1097/MD.00000000000019769
- 283 Henzel J, Makarewicz-Wujec M, Wardziak L, *et al.* High-risk plaque regression after intensive dietary intervention in patients with non-obstructive coronary artery disease: a randomised computed tomography angiography study (DISCO-CT). *Eur Heart J* 2020;**41**. doi:10.1093/ehjci/ehaa946.0185
- 284 Aldana SG, Greenlaw R, Salberg A, *et al.* The effects of an intensive lifestyle modification program on carotid artery intima-media thickness: a randomized trial. *Am J Health Promot* 2007;**21**:510–6. doi:10.4278/0890-1171-21.6.510
- 285 Ard JD, Gower B, Hunter G, *et al.* Effects of calorie restriction in obese older adults: the CROSSROADS randomized controlled trial. *J Gerontol A Biol Sci Med Sci* 2017;**73**:73–80. doi:10.1093/gerona/glw237
- 286 Dayton S, Pearce ML, Hashimoto S, *et al.* A controlled clinical trial of a diet high in unsaturated fat in preventing complications of atherosclerosis. *Circulation* 1969;**40**:II–1. doi:10.1161/01.CIR.40.1S2.II-1
- 287 Abbenhardt C, McTiernan A, Alfano CM, *et al.* Effects of individual and combined dietary weight loss and exercise interventions in postmenopausal women on adiponectin and leptin levels. *J Intern Med* 2013;**274**:163–75. doi:10.1111/joim.12062

- 288 Ackermann RT, Liss DT, Finch EA, *et al.* A randomized comparative effectiveness trial for preventing type 2 diabetes. *Am J Public Health* 2015;**105**:2328–34. doi:10.2105/AJPH.2015.302641
- 289 Andrews RC, Cooper AR, Montgomery AA, *et al.* Diet or diet plus physical activity versus usual care in patients with newly diagnosed type 2 diabetes: the Early ACTID randomised controlled trial. *Lancet* 2011;**378**:129–39. doi:10.1016/S0140-6736(11)60442-X
- 290 Aveyard P, Lewis A, Tearne S, *et al.* Screening and brief intervention for obesity in primary care: a parallel, two-arm, randomised trial. *Lancet* 2016;**388**:2492–500. doi:10.1016/S0140-6736(16)31893-1
- 291 Retzlaff BM, Walden CE, McNeney WB, *et al.* Nutritional intake of women and men on the NCEP Step I and Step II diets. *J Am Coll Nutr* 1997;**16**:52–61. doi:10.1080/07315724.1997.10718649
- 292 Anderson AS, Craigie AM, Caswell S, *et al.* The impact of a bodyweight and physical activity intervention (BeWEL) initiated through a national colorectal cancer screening programme: randomised controlled trial. *BMJ* 2014;**348**:g1823. doi:10.1136/bmj.g1823
- 293 Bhopal RS, Douglas A, Wallia S, *et al.* Effect of a lifestyle intervention on weight change in south Asian individuals in the UK at high risk of type 2 diabetes: a family-cluster randomised controlled trial. *Lancet Diabetes Endocrinol* 2014;**2**:218–27. doi:10.1016/S2213-8587(13)70204-3
- 294 Burke V, Mansour J, Beilin LJ, *et al.* Long-term follow-up of participants in a health promotion program for treated hypertensives (ADAPT). *Nutr Metab Cardiovasc Dis* 2008;**18**:198–206. doi:10.1016/j.numecd.2006.10.004
- 295 Daumit GL, Dickerson FB, Wang N-Y, *et al.* A behavioral weight-loss intervention in persons with serious mental illness. *N Engl J Med* 2013;**368**:1594–602. doi:10.1056/NEJMoa1214530
- 296 Davis BR, Blaufox MD, Oberman A, *et al.* Reduction in long-term antihypertensive medication requirements. Effects of weight reduction by dietary intervention in overweight persons with mild hypertension. *Arch Intern Med* 1993;**153**:1773–82. doi:10.1001/archinte.153.15.1773
- 297 de Vos BC, Runhaar J, Bierma-Zeinstra SMA. Effectiveness of a tailor-made weight loss intervention in primary care. *Eur J Nutr* 2014;**53**:95–104. doi:10.1007/s00394-013-0505-y
- 298 de Waard F, Ramlau R, Mulders Y, *et al.* A feasibility study on weight reduction in obese postmenopausal breast cancer patients. *Eur J Cancer Prev* 1993;**2**:233–8. doi:10.1097/00008469-199305000-00007
- 299 Hjerkin EM, Abdelnoor M, Breivik L, *et al.* Effect of diet or very long chain omega-3 fatty acids on progression of atherosclerosis, evaluated by carotid plaques, intima-media thickness and by pulse wave propagation in elderly men with hypercholesterolaemia. *Eur J Cardiovasc Prev Rehabil* 2006;**13**:325–33. doi:10.1097/01.hjr.0000209817.28444.fb
- 300 Knowler WC, Barrett-Connor E, Fowler SE, *et al.* Reduction in the incidence of type 2 diabetes with lifestyle intervention or metformin. *N Engl J Med* 2002;**346**:393–403. doi:10.1056/NEJMoa012512

- 301 Dullaart RP, Beusekamp BJ, Meijer S, *et al.* Long-term effects of linoleic-acid-enriched diet on albuminuria and lipid levels in type 1 (insulin-dependent) diabetic patients with elevated urinary albumin excretion. *Diabetologia* 1992;**35**:165–72. doi:10.1007/BF00402550
- 302 Tuomilehto J, Lindström J, Eriksson JG, *et al.* Prevention of type 2 diabetes mellitus by changes in lifestyle among subjects with impaired glucose tolerance. *N Engl J Med* 2001;**344**:1343–50. doi:10.1056/NEJM200105033441801
- 303 Uusitupa M, Peltonen M, Lindström J, *et al.* Ten-year mortality and cardiovascular morbidity in the Finnish Diabetes Prevention Study--secondary analysis of the randomized trial. *PLoS One* 2009;**4**:e5656. doi:10.1371/journal.pone.0005656
- 304 Fitzgibbon ML, Stolley MR, Schiffer L, *et al.* Obesity reduction black intervention trial (ORBIT): 18-month results. *Obesity (Silver Spring)* 2010;**18**:2317–25. doi:10.1038/oby.2010.47
- 305 Gabriel KKP, Conroy MB, Schmid KK, *et al.* The impact of weight and fat mass loss and increased physical activity on physical function in overweight, postmenopausal women: results from the Women on the Move Through Activity and Nutrition study. *Menopause* 2011;**18**:759–65. doi:10.1097/gme.0b013e31820acdcc
- 306 Goodwin PJ, Segal RJ, Vallis M, *et al.* Randomized trial of a telephone-based weight loss intervention in postmenopausal women with breast cancer receiving letrozole: the LISA trial. *J Clin Oncol* 2014;**32**:2231–9. doi:10.1200/JCO.2013.53.1517
- 307 Green CA, Yarborough BJH, Leo MC, *et al.* Weight maintenance following the STRIDE lifestyle intervention for individuals taking antipsychotic medications. *Obesity (Silver Spring)* 2015;**23**:1995–2001. doi:10.1002/oby.21205
- 308 Houtsmuller AJ, Zahn KJ, Henkes HE. Unsaturated fats and progression of diabetic retinopathy. *Doc Ophthalmol* 1980;**48**:363–71. doi:10.1007/BF00141465
- 309 Hypertension Prevention Trial Research Group. The Hypertension Prevention Trial: three-year effects of dietary changes on blood pressure. *Arch Intern Med* 1990;**150**:153–62.
- 310 Hunt K, Wyke S, Gray CM, *et al.* A gender-sensitised weight loss and healthy living programme for overweight and obese men delivered by Scottish Premier League football clubs (FFIT): a pragmatic randomised controlled trial. *Lancet* 2014;**383**:1211–21. doi:10.1016/S0140-6736(13)62420-4
- 311 Katula JA, Vitolins MZ, Morgan TM, *et al.* The Healthy Living Partnerships to Prevent Diabetes study: 2-year outcomes of a randomized controlled trial. *Am J Prev Med* 2013;**44**:S324-332. doi:10.1016/j.amepre.2012.12.015
- 312 Laake K, Seljeflot I, Fagerland MW, *et al.* Effects on serum fractalkine by diet and omega-3 fatty acid intervention: relation to clinical outcome. *Mediators Inflamm* 2015;**2015**:373070. doi:10.1155/2015/373070
- 313 Lear SA, Ignaszewski A, Linden W, *et al.* The Extensive Lifestyle Management Intervention (ELMI) following cardiac rehabilitation trial. *Eur Heart J* 2003;**24**:1920–7. doi:10.1016/j.ehj.2003.08.015

- 314 Lear SA, Ignaszewski A, Linden W, *et al.* A randomized controlled trial of an extensive lifestyle management intervention (ELMI) following cardiac rehabilitation: study design and baseline data. *Curr Control Trials Cardiovasc Med* 2002;**3**:9. doi:10.1186/1468-6708-3-9
- 315 Ley SJ, Metcalf PA, Scragg RKR, *et al.* Long-term effects of a reduced fat diet intervention on cardiovascular disease risk factors in individuals with glucose intolerance. *Diabetes Res Clin Pract* 2004;**63**:103–12. doi:10.1016/j.diabres.2003.09.001
- 316 Logue E, Sutton K, Jarjoura D, *et al.* Transtheoretical model-chronic disease care for obesity in primary care: a randomized trial. *Obes Res* 2005;**13**:917–27. doi:10.1038/oby.2005.106
- 317 Ma J, Yank V, Xiao L, *et al.* Translating the Diabetes Prevention Program lifestyle intervention for weight loss into primary care: a randomized trial. *JAMA Intern Med* 2013;**173**:113–21. doi:10.1001/2013.jamainternmed.987
- 318 McAuley KA, Hopkins CM, Smith KJ, *et al.* Comparison of high-fat and high-protein diets with a high-carbohydrate diet in insulin-resistant obese women. *Diabetologia* 2005;**48**:8–16. doi:10.1007/s00125-004-1603-4
- 319 Mengham LH, Morris BF, Palmer CR, *et al.* Is intensive dietetic intervention effective for overweight patients with diabetes mellitus? A randomized controlled study in a general practice. *Practical Diabetes International* 1999;**16**:5–8. doi:10.1002/pdi.1960160107
- 320 Messier SP, Mihalko SL, Legault C, *et al.* Effects of intensive diet and exercise on knee joint loads, inflammation, and clinical outcomes among overweight and obese adults with knee osteoarthritis: the IDEA randomized clinical trial. *JAMA* 2013;**310**:1263–73. doi:10.1001/jama.2013.277669
- 321 Frantz ID, Dawson EA, Ashman PL, *et al.* Test of effect of lipid lowering by diet on cardiovascular risk. The Minnesota Coronary Survey. *Arteriosclerosis* 1989;**9**:129–35. doi:10.1161/01.atv.9.1.129
- 322 Oldroyd JC, Unwin NC, White M, *et al.* Randomised controlled trial evaluating lifestyle interventions in people with impaired glucose tolerance. *Diabetes Res Clin Pract* 2006;**72**:117–27. doi:10.1016/j.diabres.2005.09.018
- 323 Patrick K, Calfas KJ, Norman GJ, *et al.* Outcomes of a 12-month web-based intervention for overweight and obese men. *Ann Behav Med* 2011;**42**:391–401. doi:10.1007/s12160-011-9296-7
- 324 Penn L, White M, Oldroyd J, *et al.* Prevention of type 2 diabetes in adults with impaired glucose tolerance: the European Diabetes Prevention RCT in Newcastle upon Tyne, UK. *BMC Public Health* 2009;**9**:342. doi:10.1186/1471-2458-9-342
- 325 Perri MG, Limacher MC, von Castel-Roberts K, *et al.* Comparative effectiveness of three doses of weight-loss counseling: two-year findings from the rural LITE trial. *Obesity (Silver Spring)* 2014;**22**:2293–300. doi:10.1002/oby.20832
- 326 Rejeski WJ, Brubaker PH, Goff DC, *et al.* Translating weight loss and physical activity programmes into the community to preserve mobility in older, obese adults in poor cardiovascular health. *Arch Intern Med* 2011;**171**:880–6. doi:10.1001/archinternmed.2010.522

- 327 Rock CL, Flatt SW, Byers TE, *et al.* Results of the Exercise and Nutrition to Enhance Recovery and Good Health for You (ENERGY) trial: a behavioral weight loss intervention in overweight or obese breast cancer survivors. *J Clin Oncol* 2015;**33**:3169–76. doi:10.1200/JCO.2015.61.1095
- 328 Ross R, Lam M, Blair SN, *et al.* Trial of prevention and reduction of obesity through active living in clinical settings: a randomized controlled trial. *Arch Intern Med* 2012;**172**:414–24. doi:10.1001/archinternmed.2011.1972
- 329 Sacks FM, Bray GA, Carey VJ, *et al.* Comparison of weight-loss diets with different compositions of fat, protein, and carbohydrates. *N Engl J Med* 2009;**360**:859–73. doi:10.1056/NEJMoa0804748
- 330 Shai I, Schwarzfuchs D, Henkin Y, *et al.* Weight loss with a low-carbohydrate, Mediterranean, or low-fat diet. *New Engl J Med* 2008;**359**:229–41. doi:10.1056/NEJMoa0708681
- 331 Smith-Warner SA, Elmer PJ, Tharp TM, *et al.* Increasing vegetable and fruit intake: randomized intervention and monitoring in an at-risk population. *Cancer Epidemiol Biomarkers Prev* 2000;**9**:307–17.
- 332 The effects of nonpharmacologic interventions on blood pressure of persons with high normal levels. Results of the Trials of Hypertension Prevention, Phase I. *JAMA* 1992;**267**:1213–20. doi:10.1001/jama.1992.03480090061028
- 333 Uusitupa M, Laitinen J, Siitonen O, *et al.* The maintenance of improved metabolic control after intensified diet therapy in recent type 2 diabetes. *Diabetes Res Clin Pract* 1993;**19**:227–38. doi:10.1016/0168-8227(93)90118-o
- 334 Villareal DT, Chode S, Parimi N, *et al.* Weight loss, exercise, or both and physical function in obese older adults. *New Engl J Med* 2011;**364**:1218–29. doi:10.1056/NEJMoa1008234
- 335 Wadden TA, Volger S, Sarwer DB, *et al.* A two-year randomized trial of obesity treatment in primary care practice. *New Engl J Med* 2011;**365**:1969–79. doi:10.1056/NEJMoa1109220
- 336 Wing RR, West DS, Grady D, *et al.* Effect of weight loss on urinary incontinence in overweight and obese women: results at 12 and 18 months. *J Urol* 2010;**184**:1005–10. doi:10.1016/j.juro.2010.05.031
- 337 Yardley L, Ware LJ, Smith ER, *et al.* Randomised controlled feasibility trial of a web-based weight management intervention with nurse support for obese patients in primary care. *Int J Behav Nutr Phys Act* 2014;**11**:67. doi:10.1186/1479-5868-11-67
- 338 Allison MA, Aragaki A, Eaton C, *et al.* Effect of dietary modification on incident carotid artery disease in postmenopausal women: results from the women’s health initiative dietary modification trial. *Stroke* 2014;**45**:1748–56. doi:10.1161/STROKEAHA.114.005096
- 339 Al Wattar BH. Mediterranean-style diet in pregnant women with metabolic risk factors (ESTEEM): A pragmatic multicentre randomised trial. *Int J Gynecol Obstet* 2018;**143**:192. doi:10.1002/ijgo.12582

- 340 Chisholm A, Mann J, Sutherland W, *et al.* Dietary management of patients with familial hypercholesterolaemia treated with simvastatin. *Q J Med* 1992;**85**:825–31.
- 341 de Luis DA, Aller R, Izaola O, *et al.* Effects of a high-protein/low-carbohydrate versus a standard hypocaloric diet on adipocytokine levels and cardiovascular risk factors during 9 months, role of rs6923761 gene variant of glucagon-like peptide 1 receptor. *J Endocrinol Invest* 2015;**38**:1183–9. doi:10.1007/s40618-015-0304-9
- 342 de Luis DA, Aller R, Izaola O, *et al.* Effects of a high-protein/low-carbohydrate diet versus a standard hypocaloric diet on weight and cardiovascular risk factors: role of a genetic variation in the rs9939609 FTO gene variant. *LFG* 2015;**8**:128–36. doi:10.1159/000441142
- 343 Geleijnse JM, Witteman JC, Bak AA, *et al.* Reduction in blood pressure with a low sodium, high potassium, high magnesium salt in older subjects with mild to moderate hypertension. *BMJ* 1994;**309**:436–40. doi:10.1136/bmj.309.6952.436
- 344 Hebert PR, Bolt RJ, Borhani NO, *et al.* Design of a multicenter trial to evaluate long-term life-style intervention in adults with high-normal blood pressure levels. Trials of Hypertension Prevention (phase II). Trials of Hypertension Prevention (TOHP) Collaborative Research Group. *Ann Epidemiol* 1995;**5**:130–9. doi:10.1016/1047-2797(94)00057-z
- 345 Hollis JF, Satterfield S, Smith F, *et al.* Recruitment for phase II of the trials of hypertension prevention: Effective strategies and predictors of randomization. *Ann Epidemiol* 1995;**5**:140–8. doi:10.1016/1047-2797(94)00058-2
- 346 Jenkins DJA, Boucher BA, Ashbury FD, *et al.* Effect of Current Dietary Recommendations on Weight Loss and Cardiovascular Risk Factors. *J Am Coll Cardiol* 2017;**69**:1103–12. doi:10.1016/j.jacc.2016.10.089
- 347 Mascioli SR, Grimm RH, Neaton JD, *et al.* Characteristics of participants at baseline in the Treatment of Mild Hypertension Study (TOMHS). *Am J Cardiol* 1990;**66**:32C-35C. doi:10.1016/0002-9149(90)90760-x
- 348 Ortner Hadžiabdić M, Vitali Čepo D, Rahelić D, *et al.* The effect of the Mediterranean diet on serum total antioxidant capacity in obese patients: a randomized controlled trial. *J Am Coll Nutr* 2016;**35**:224–35. doi:10.1080/07315724.2014.982770
- 349 Primo D, Izaola O, de Luis D. Efectos de una dieta hipocalórica rica en proteína/baja de hidratos de carbono vs. una estándar sobre los parámetros antropométricos y factores de riesgo cardiovascular, papel del polimorfismo rs3123554 del gen del receptor canabinoide tipo 2 (CB2R). *Endocrinología, Diabetes y Nutrición* 2020;**67**:446–53. doi:10.1016/j.endinu.2019.09.010
- 350 Stradling C, Taylor S, Thomas G, *et al.* Mediterranean diet can improve cardiovascular risk in HIV dyslipidaemia: A randomised controlled dietary intervention trial. *HIV Medicine* 2017;**18**:41.
- 351 Stradling C, Thomas G, Hemming K, *et al.* The mediterranean portfolio diet in HIV dyslipidaemia: a randomized controlled trial. *Topics in antiviral medicine* 2018;**26**:306s.

- 352 Thomson CA, Van Horn L, Caan BJ, *et al.* Cancer incidence and mortality during the intervention and postintervention periods of the Women’s Health Initiative dietary modification trial. *Cancer Epidemiol Biomarkers Prev* 2014;**23**:2924–35. doi:10.1158/1055-9965.EPI-14-0922
- 353 Whelton PK, Kumanyika SK, Cook NR, *et al.* Efficacy of nonpharmacologic interventions in adults with high-normal blood pressure: results from phase 1 of the Trials of Hypertension Prevention. Trials of Hypertension Prevention Collaborative Research Group. *Am J Clin Nutr* 1997;**65**:652S-660S. doi:10.1093/ajcn/65.2.652S
- 354 Calvo-Malvar M, Benítez-Estévez AJ, Sánchez-Castro J, *et al.* Effects of a community-based behavioral intervention with a traditional atlantic diet on cardiometabolic risk markers: a cluster randomized controlled trial (“The GALIAT Study”). *Nutrients* 2021;**13**:1211. doi:10.3390/nu13041211
- 355 Chen C-G, Wang P, Zhang Z-Q, *et al.* Effects of plant oils with different fatty acid composition on cardiovascular risk factors in moderately hypercholesteremic Chinese adults: a randomized, double-blinded, parallel-designed trial. *Food Funct* 2020;**11**:7164–74. doi:10.1039/D0FO00875C
